# Supplementary material for: The unusual cell wall of the Lyme disease spirochaete Borrelia burgdorferi is shaped by a tick sugar
Source: PubMed Central journal article supplement (PMC8612929; doi:10.1038/s41564-021-01003-w), 2021-11-24
Supplement: 41564_2021_1003_MOESM1_ESM.pdf [file 41564_2021_1003_MOESM1_ESM.pdf]

---

**Supplementary information**

---

**The unusual cell wall of the Lyme disease spirochaete *Borrelia burgdorferi* is shaped by a tick sugar**

---

In the format provided by the authors and unedited

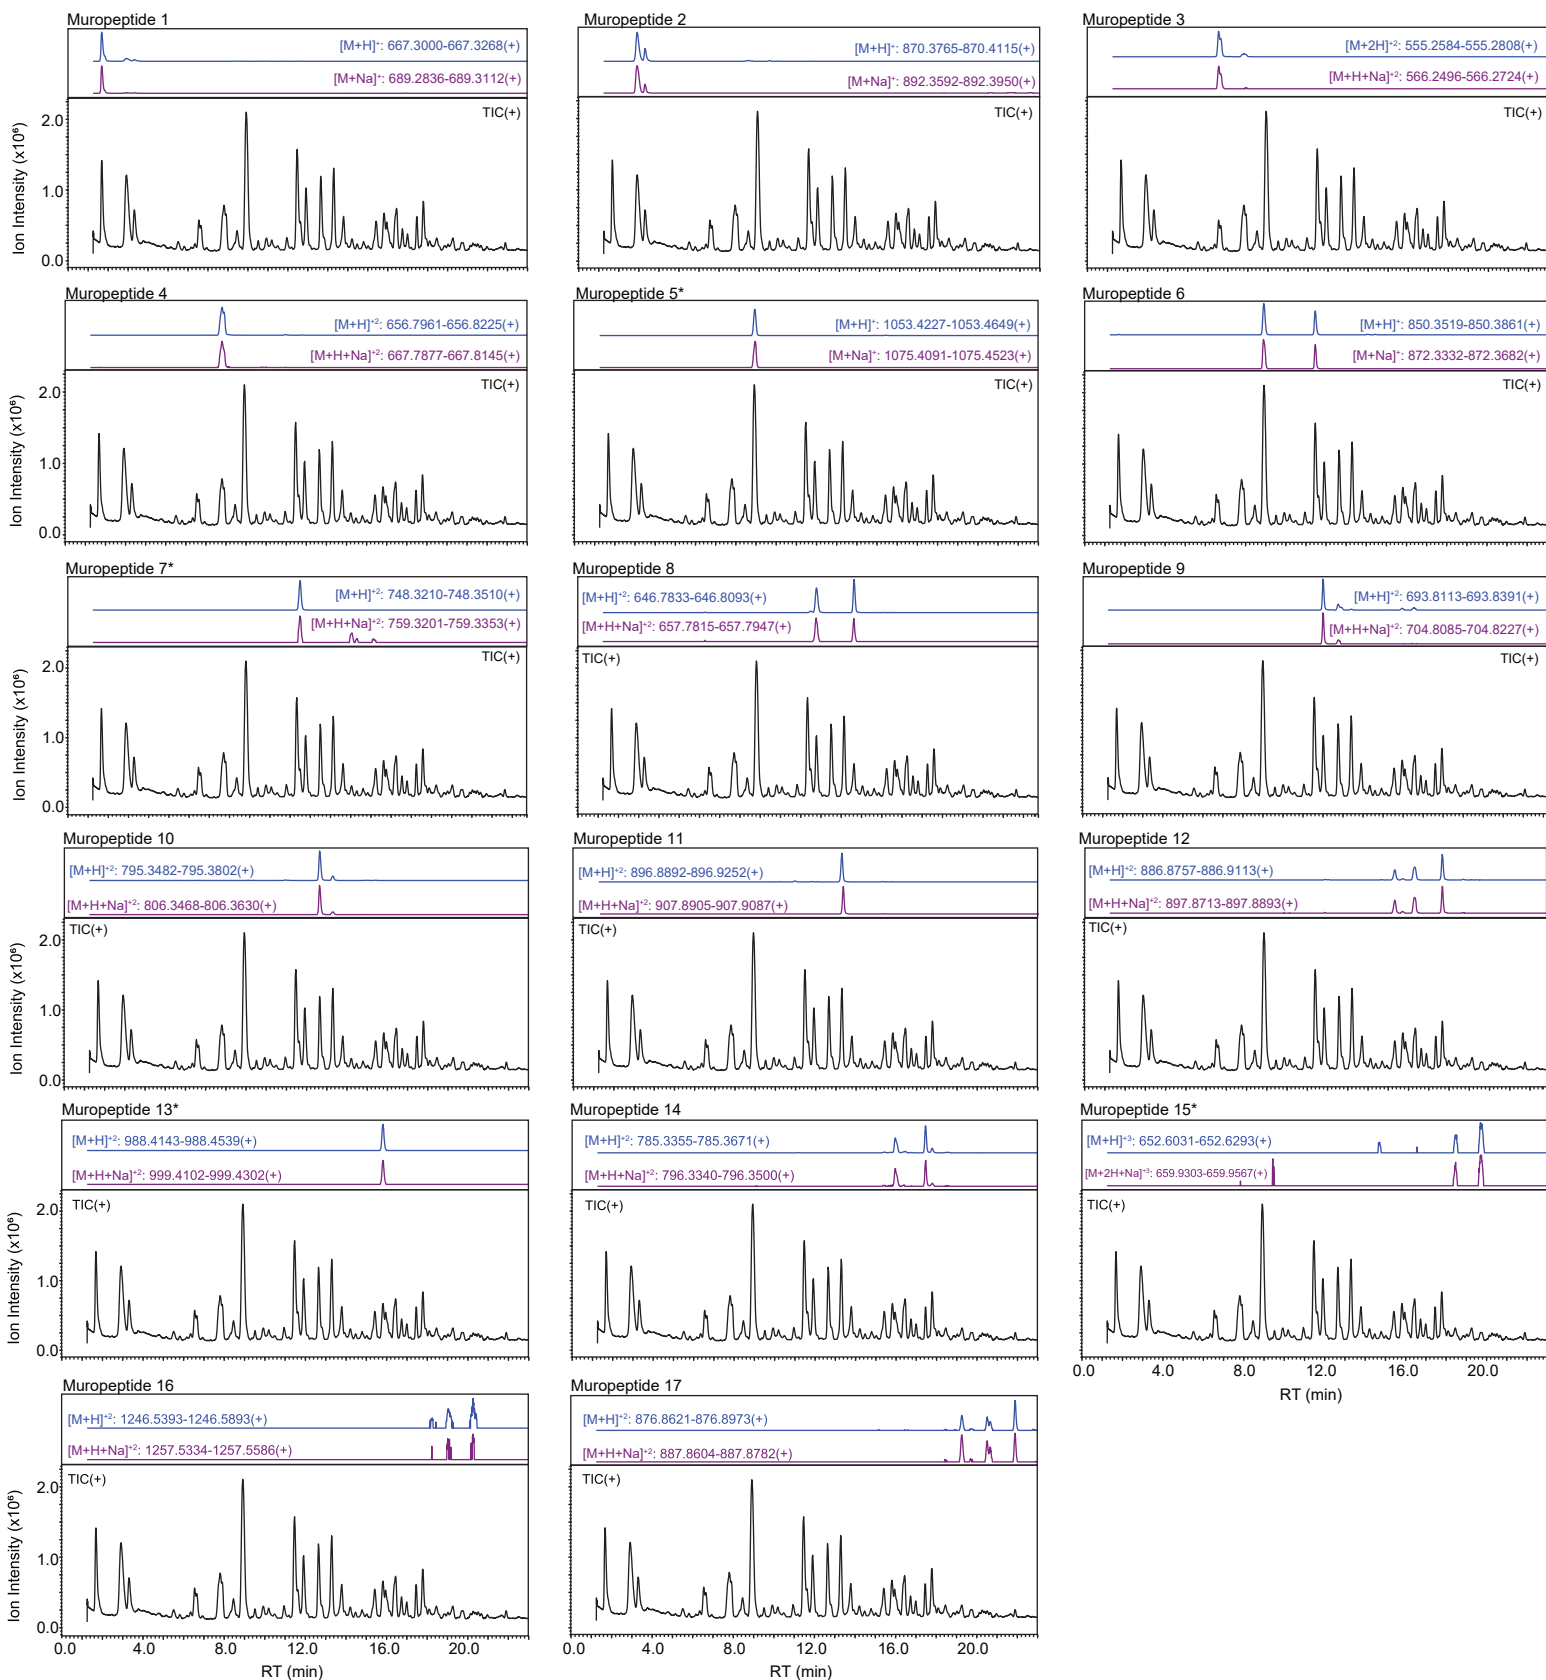

Supplemental Figure 1: LCMS chromatograms by muropptide – Total ion counts (TICs) are shown in black with the  $[M+H]^+$  and  $[M+Na]^+$  for each muropptide shown in blue and purple, respectively. \*Muropptides containing G-G-anhM are denoted by an asterisk.

Supplemental Table 1: Analysis of muropeptides present in 5A11 *B. burgdorferi* peptidoglycan.

| Muropeptide ID | Structure                                                                                           | Relative % of PG | Theoretical [M+H] <sup>+</sup> | Previously Identified as <sup>γ</sup> |
|----------------|-----------------------------------------------------------------------------------------------------|------------------|--------------------------------|---------------------------------------|
| 1              | MurNAc-Ala-Glu-Orn-Gly                                                                              | 16.9             | 667.3145                       | Peak 1                                |
| 2              | GlcNAc-MurNAc-Ala-Glu-Orn-Gly                                                                       | 27.4             | 870.3938                       | Peak 2                                |
| 3              | MurNAc-Ala-Glu-Orn-[Gly]-Ala-Gly-Orn-Glu-Ala                                                        | 1.7              | 1109.5321                      | NM                                    |
| 4              | GlcNAc-MurNAc-Ala-Glu-Orn-[Gly]-Ala-Gly-Orn-Glu-Ala                                                 | <0.5             | 1312.6114                      | NM                                    |
| 5*             | GlcNAc-GlcNAc-MurNAcAnh-Ala-Glu-Orn-Gly                                                             | 0.6              | 1053.4470                      | Peak 3                                |
| 6              | GlcNAc-MurNAcAnh-Ala-Glu-Orn-Gly                                                                    | 5.4              | 850.3676                       | Peak 4 & 7                            |
| 7*             | GlcNAc-GlcNAc-MurNAcAnh-Ala-Glu-Orn-[Gly]-Ala-Gly-Orn-Glu-Ala                                       | <0.5             | 1495.6646                      | NM                                    |
| 8              | GlcNAc-MurNAcAnh-Ala-Glu-Orn-[Gly]-Ala-Gly-Orn-Glu-Ala                                              | <0.5             | 1292.5852                      | NM                                    |
| 9              | MurNAc-Ala-Glu-Orn-[Gly]-Ala-Gly-Orn-Glu-Ala-MurNAc                                                 | 4.7              | 1386.6482                      | Peak 6                                |
| 10             | GlcNAc-MurNAc-Ala-Glu-Orn-[Gly]-Ala-Gly-Orn-Glu-Ala-MurNAc                                          | 3.0              | 1589.7276                      | Peak 8                                |
| 11             | GlcNAc-MurNAc-Ala-Glu-Orn-[Gly]-Ala-Gly-Orn-Glu-Ala-MurNAc-GlcNAc                                   | 11.7             | 1792.8070                      | Peak 9                                |
| 12             | GlcNAc-MurNAc-Ala-Glu-Orn-[Gly]-Ala-Gly-Orn-Glu-Ala-MurNAcAnh-GlcNAc                                | 6.0              | 1772.7808                      | Peak 10 & 11                          |
| 13*            | GlcNAc-GlcNAc-MurNAcAnh-Ala-Glu-Orn-[Gly]-Ala-Gly-Orn-Glu-Ala-MurNAc-GlcNAc                         | 0.8              | 1975.8601                      | NM                                    |
| 14             | GlcNAc-MurNAcAnh-Ala-Glu-Orn-[Gly]-Ala-Gly-Orn-Glu-Ala-MurNAc                                       | 1.0              | 1569.7014                      | NM                                    |
| 15*            | GlcNAc-GlcNAc-MurNAcAnh-Ala-Glu-Orn-Gly-Ala-Orn-[Gly]-Glu-Ala-MurNAcAnh-GlcNAc                      | <0.5             | 1955.8339                      | NM                                    |
| 16             | MurNAc-(Ala-Glu-Orn-Gly-Ala)-GlcNAc-MurNAc-(Ala-Glu-Orn-Gly-Ala)-GlcNAc-MurNAcAnh-(Ala-Glu-Orn-Gly) | <0.5             | 2492.1145                      | NM                                    |
| 17             | GlcNAc-MurNAcAnh-Ala-Glu-Orn-[Gly]-Ala-Gly-Orn-Glu-Ala-MurNAcAnh-GlcNAc                             | <0.5             | 1752.7545                      | NM                                    |

γ – As previously identified in Jutras et. al., 2019, PNAS. NM denotes newly identified muropeptides.

\* Muropeptide contains G-G-anhM.

Supplemental Table 2: Muropeptide-containing peaks from 5A11 *B. burgdorferi* peptidoglycan analyzed via LCMS.

| Peak # | Muropeptide ID | [M+H] <sup>+</sup> | Structure                                                                                           | RT (mins) |
|--------|----------------|--------------------|-----------------------------------------------------------------------------------------------------|-----------|
| 1      | 1              | 667.3145           | MurNAc-Ala-Glu-Orn-Gly                                                                              | 1.688     |
| 2      | 2a             | 870.3939           | GlcNAc-MurNAc-Ala-Glu-Orn-Gly                                                                       | 2.935     |
| 3      | 2b             | 870.3939           | GlcNAc-MurNAc-Ala-Glu-Orn-Gly                                                                       | 3.342     |
| 4      | 3              | 1109.5321          | MurNAc-Ala-Glu-Orn-[Gly]-Ala-Gly-Orn-Glu-Ala                                                        | 6.548     |
| 5      | 4              | 1312.6115          | GlcNAc-MurNAc-Ala-Glu-Orn-[Gly]-Ala-Gly-Orn-Glu-Ala                                                 | 7.842     |
| 6      | 5*             | 1053.4470          | GlcNAc-GlcNAc-MurNAcAnh-Ala-Glu-Orn-Gly                                                             | 8.935     |
|        | 6a             | 850.3676           | GlcNAc-MurNAcAnh-Ala-Glu-Orn-Gly                                                                    |           |
| 7      | 6b             | 850.3676           | GlcNAc-MurNAcAnh-Ala-Glu-Orn-Gly                                                                    | 11.477    |
| 8      | 7*             | 1495.6646          | GlcNAc-GlcNAc-MurNAcAnh-Ala-Glu-Orn-[Gly]-Ala-Gly-Orn-Glu-Ala                                       | 11.627    |
| 9      | 8a             | 1292.5853          | GlcNAc-MurNAcAnh-Ala-Glu-Orn-[Gly]-Ala-Gly-Orn-Glu-Ala                                              | 11.918    |
|        | 9a             | 1386.6482          | MurNAc-Ala-Glu-Orn-[Gly]-Ala-Gly-Orn-Glu-Ala-MurNAc                                                 |           |
| 10     | 9b             | 1386.6482          | MurNAc-Ala-Glu-Orn-[Gly]-Ala-Gly-Orn-Glu-Ala-MurNAc                                                 | 12.652    |
|        | 10a            | 1589.7276          | GlcNAc-MurNAc-Ala-Glu-Orn-[Gly]-Ala-Gly-Orn-Glu-Ala-MurNAc                                          |           |
| 11     | 10b            | 1589.7276          | GlcNAc-MurNAc-Ala-Glu-Orn-[Gly]-Ala-Gly-Orn-Glu-Ala-MurNAc                                          | 13.302    |
|        | 11             | 1792.8070          | GlcNAc-MurNAc-Ala-Glu-Orn-[Gly]-Ala-Gly-Orn-Glu-Ala-MurNAc-GlcNAc                                   |           |
| 12     | 8b             | 1292.5853          | GlcNAc-MurNAcAnh-Ala-Glu-Orn-[Gly]-Ala-Gly-Orn-Glu-Ala                                              | 13.802    |
| 13     | 12a            | 1772.7808          | GlcNAc-MurNAc-Ala-Glu-Orn-[Gly]-Ala-Gly-Orn-Glu-Ala-MurNAcAnh-GlcNAc                                | 15.428    |
| 14     | 13*            | 1975.8601          | GlcNAc-GlcNAc-MurNAcAnh-Ala-Glu-Orn-[Gly]-Ala-Gly-Orn-Glu-Ala-MurNAc-GlcNAc                         | 15.828    |
| 15     | 14a            | 1569.7014          | GlcNAc-MurNAcAnh-Ala-Glu-Orn-[Gly]-Ala-Gly-Orn-Glu-Ala-MurNAc                                       | 15.962    |
| 16     | 12b            | 1772.7808          | GlcNAc-MurNAc-Ala-Glu-Orn-[Gly]-Ala-Gly-Orn-Glu-Ala-MurNAcAnh-GlcNAc                                | 16.433    |
| 17     | 14b            | 1569.7014          | GlcNAc-MurNAcAnh-Ala-Glu-Orn-[Gly]-Ala-Gly-Orn-Glu-Ala-MurNAc                                       | 17.478    |
| 18     | 14c            | 1569.7014          | GlcNAc-MurNAcAnh-Ala-Glu-Orn-[Gly]-Ala-Gly-Orn-Glu-Ala-MurNAc                                       | 17.803    |
|        | 12c            | 1772.7808          | GlcNAc-MurNAc-Ala-Glu-Orn-[Gly]-Ala-Gly-Orn-Glu-Ala-MurNAcAnh-GlcNAc                                |           |
| 19     | 15a*           | 1955.8339          | GlcNAc-GlcNAc-MurNAcAnh-Ala-Glu-Orn-Gly-Ala-Orn-[Gly]-Glu-Ala-MurNAcAnh-GlcNAc                      | 18.490    |
| 20     | 16a            | 2492.1145          | MurNAc-(Ala-Glu-Orn-Gly-Ala)-GlcNAc-MurNAc-(Ala-Glu-Orn-Gly-Ala)-GlcNAc-MurNAcAnh-(Ala-Glu-Orn-Gly) | 19.043    |
| 21     | 17a            | 1752.7546          | GlcNAc-MurNAcAnh-Ala-Glu-Orn-[Gly]-Ala-Gly-Orn-Glu-Ala-MurNAcAnh-GlcNAc                             | 19.277    |
| 22     | 15b*           | 1955.8339          | GlcNAc-GlcNAc-MurNAcAnh-Ala-Glu-Orn-Gly-Ala-Orn-[Gly]-Glu-Ala-MurNAcAnh-GlcNAc                      | 19.717    |
| 23     | 16b            | 2492.1145          | MurNAc-(Ala-Glu-Orn-Gly-Ala)-GlcNAc-MurNAc-(Ala-Glu-Orn-Gly-Ala)-GlcNAc-MurNAcAnh-(Ala-Glu-Orn-Gly) | 20.265    |
| 24     | 17b            | 1752.7546          | GlcNAc-MurNAcAnh-Ala-Glu-Orn-[Gly]-Ala-Gly-Orn-Glu-Ala-MurNAcAnh-GlcNAc                             | 20.523    |
| 25     | 17c            | 1752.7546          | GlcNAc-MurNAcAnh-Ala-Glu-Orn-[Gly]-Ala-Gly-Orn-Glu-Ala-MurNAcAnh-GlcNAc                             | 21.905    |

\* Muropeptide contains G-G-anhM

Supplemental Table 3: Theoretical vs. observed  $m/z$  for each muuropeptide after mass correction using an internal standard.

| Muropeptide | Molecular formula                                                 | Observed ion         | Theoretical $m/z$ | Observed $m/z$ | Difference (Da) |
|-------------|-------------------------------------------------------------------|----------------------|-------------------|----------------|-----------------|
| 1           | C <sub>26</sub> H <sub>46</sub> N <sub>6</sub> O <sub>14</sub>    | [M+H] <sup>+</sup>   | 667.3145          | 667.3115       | 0.0030          |
| 2           | C <sub>34</sub> H <sub>59</sub> N <sub>7</sub> O <sub>19</sub>    | [M+H] <sup>+</sup>   | 870.3938          | 870.3939       | -0.0001         |
| 3           | C <sub>44</sub> H <sub>76</sub> N <sub>12</sub> O <sub>21</sub>   | [M+2H] <sup>+2</sup> | 555.2697          | 555.2676       | 0.0021          |
| 4           | C <sub>52</sub> H <sub>89</sub> N <sub>13</sub> O <sub>26</sub>   | [M+2H] <sup>+2</sup> | 656.8094          | 656.8069       | 0.0025          |
| 5*          | C <sub>42</sub> H <sub>68</sub> N <sub>8</sub> O <sub>23</sub>    | [M+H] <sup>+</sup>   | 1053.4470         | 1053.4425      | 0.0045          |
| 6           | C <sub>34</sub> H <sub>55</sub> N <sub>7</sub> O <sub>18</sub>    | [M+H] <sup>+</sup>   | 850.3676          | 850.3639       | 0.0037          |
| 7*          | C <sub>60</sub> H <sub>98</sub> N <sub>14</sub> O <sub>30</sub>   | [M+2H] <sup>+2</sup> | 748.3359          | 748.3331       | 0.0028          |
| 8           | C <sub>52</sub> H <sub>85</sub> N <sub>13</sub> O <sub>25</sub>   | [M+2H] <sup>+2</sup> | 646.7963          | 646.7936       | 0.0027          |
| 9           | C <sub>55</sub> H <sub>95</sub> N <sub>13</sub> O <sub>28</sub>   | [M+2H] <sup>+2</sup> | 693.8278          | 693.8250       | 0.0028          |
| 10          | C <sub>63</sub> H <sub>108</sub> N <sub>14</sub> O <sub>33</sub>  | [M+2H] <sup>+2</sup> | 795.3674          | 795.3644       | 0.0030          |
| 11          | C <sub>71</sub> H <sub>121</sub> N <sub>15</sub> O <sub>38</sub>  | [M+2H] <sup>+2</sup> | 896.9071          | 896.9034       | 0.0037          |
| 12          | C <sub>71</sub> H <sub>117</sub> N <sub>15</sub> O <sub>37</sub>  | [M+2H] <sup>+2</sup> | 886.8940          | 886.8902       | 0.0038          |
| 13*         | C <sub>79</sub> H <sub>130</sub> N <sub>16</sub> O <sub>42</sub>  | [M+2H] <sup>+2</sup> | 988.4337          | 988.4299       | 0.0038          |
| 14          | C <sub>63</sub> H <sub>104</sub> N <sub>14</sub> O <sub>32</sub>  | [M+2H] <sup>+2</sup> | 785.3543          | 785.3512       | 0.0031          |
| 15*         | C <sub>79</sub> H <sub>126</sub> N <sub>16</sub> O <sub>41</sub>  | [M+2H] <sup>+2</sup> | 978.4206          | 978.4168       | 0.0038          |
| 16          | C <sub>100</sub> H <sub>166</sub> N <sub>22</sub> O <sub>51</sub> | [M+2H] <sup>+2</sup> | 1246.5609         | 1246.5564      | 0.0045          |
| 17          | C <sub>71</sub> H <sub>113</sub> N <sub>15</sub> O <sub>36</sub>  | [M+2H] <sup>+2</sup> | 876.8809          | 876.8779       | 0.0030          |

\* Muropeptide contains G-G-anhM.

**A Muropeptide 1**

RT:[1.542-1.908]

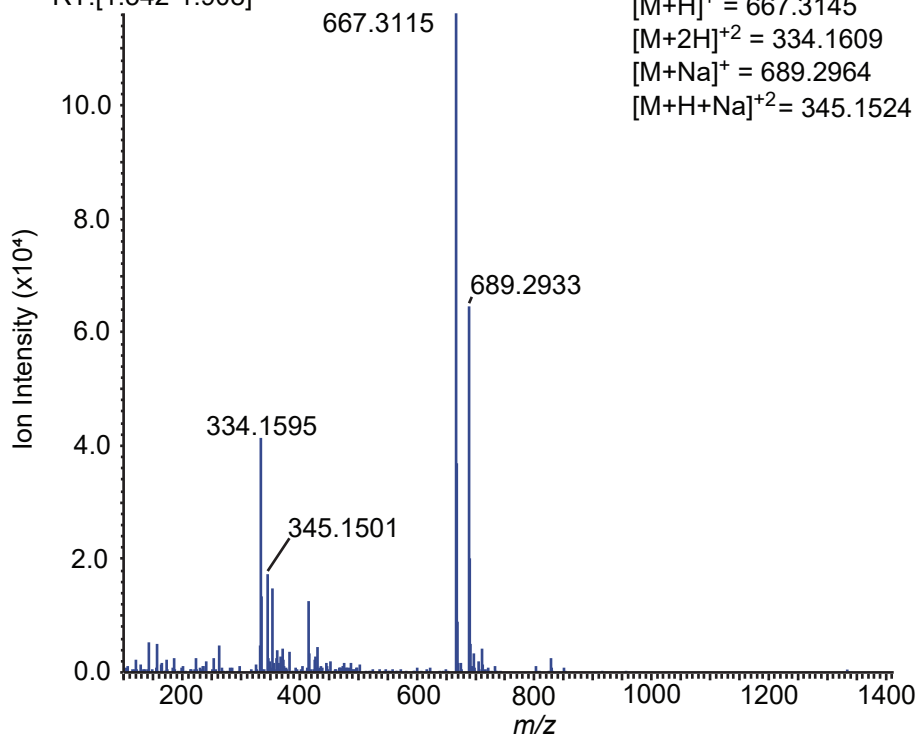**B**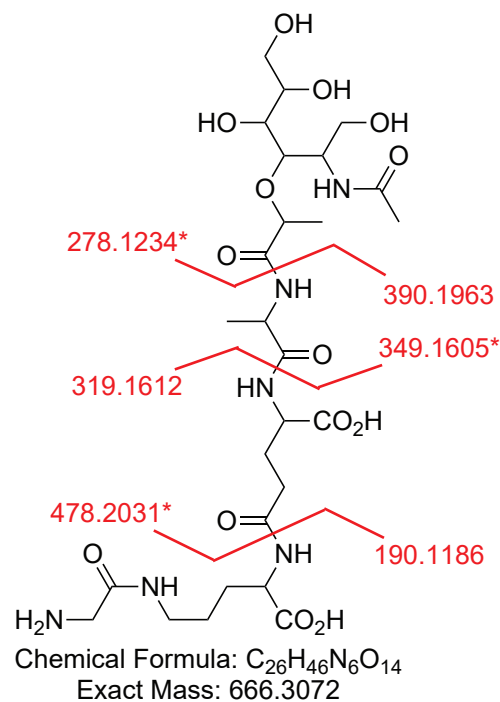\*NaBD<sub>4</sub> reduction increases m/z by 1.006**C**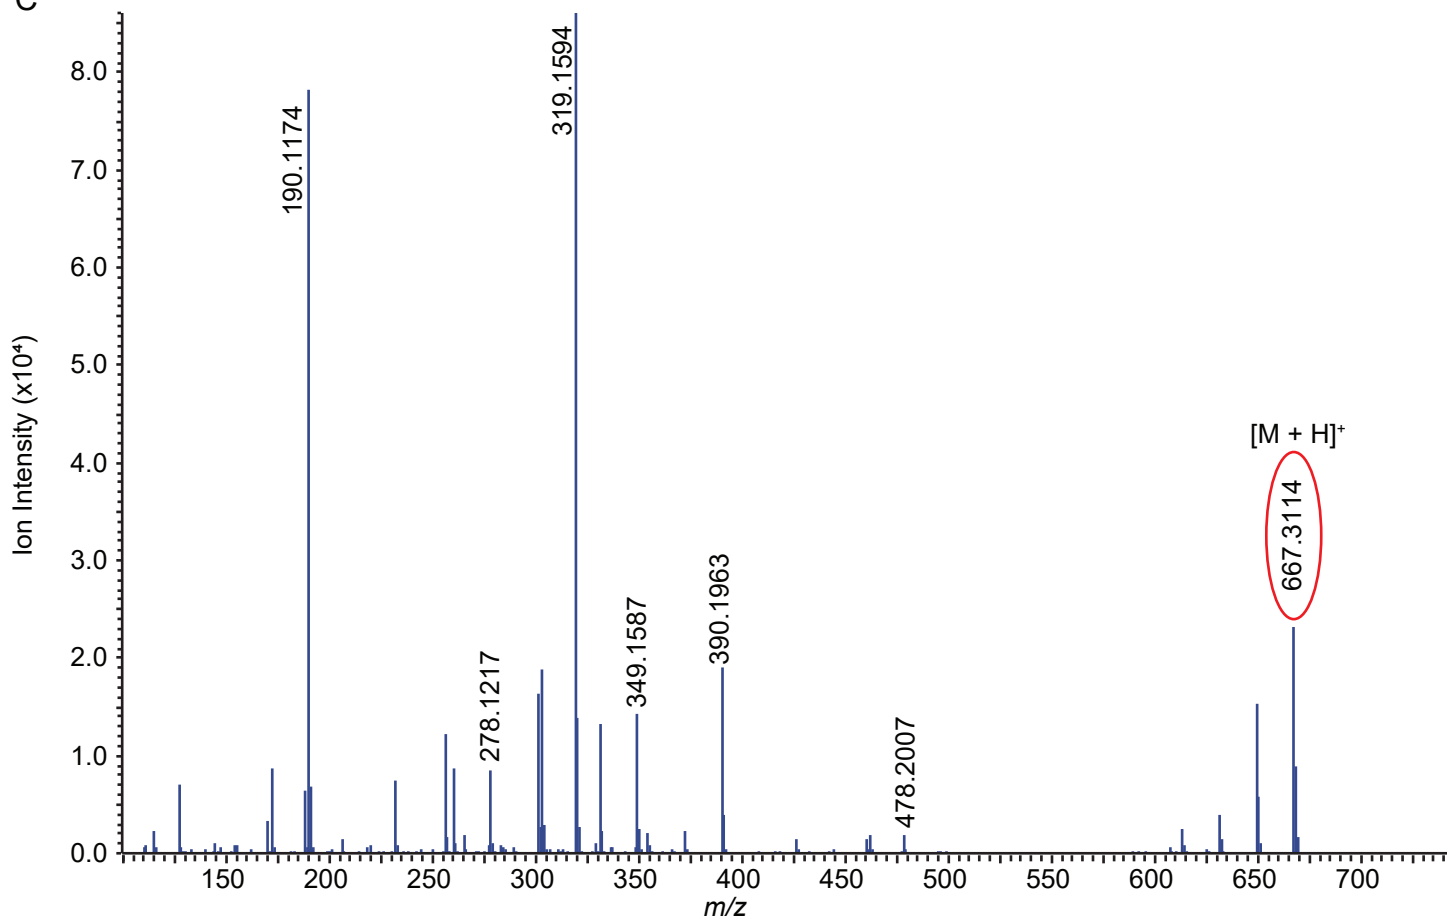

Supplemental Figure 2: (A) MS1 spectra generated from scanning retention times of 1.542-1.908 minutes. (B) The structure of muropeptide 1. Cleavages with resulting  $m/z$  fragments are shown in red. (C) MS2 obtained from targeting precursor ion 667.3145  $[M+H]^+$ . Red fragments generated in B correspond to observed MS2 fragments in C.

### A Muropeptide 2a

RT:[2.788-3.162]

$[M+H]^+ = 870.3939$   
 $[M+2H]^{+2} = 435.7006$   
 $[M+Na]^+ = 892.3758$   
 $[M+H+Na]^{+2} = 446.6915$

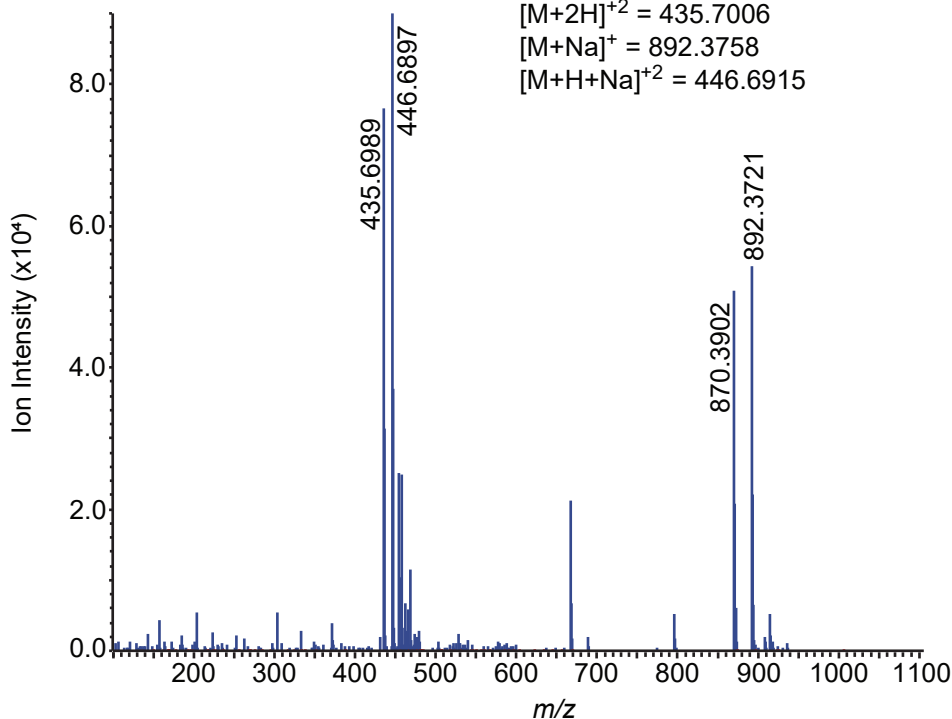

### B

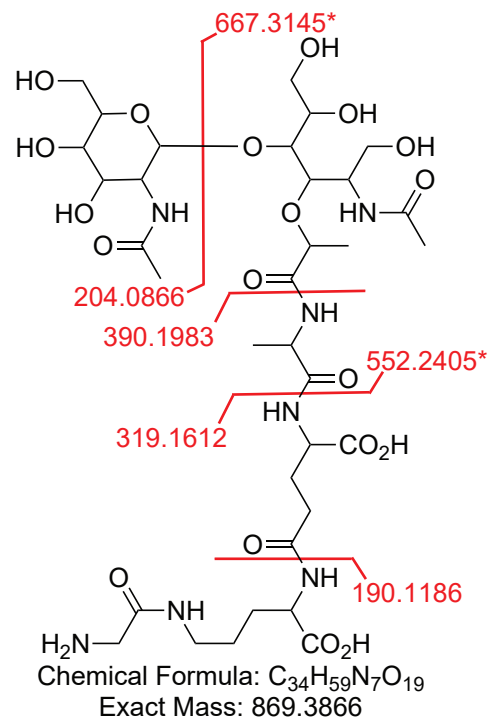

\*NaBD<sub>4</sub> reduction increases  $m/z$  by 1.006

### C

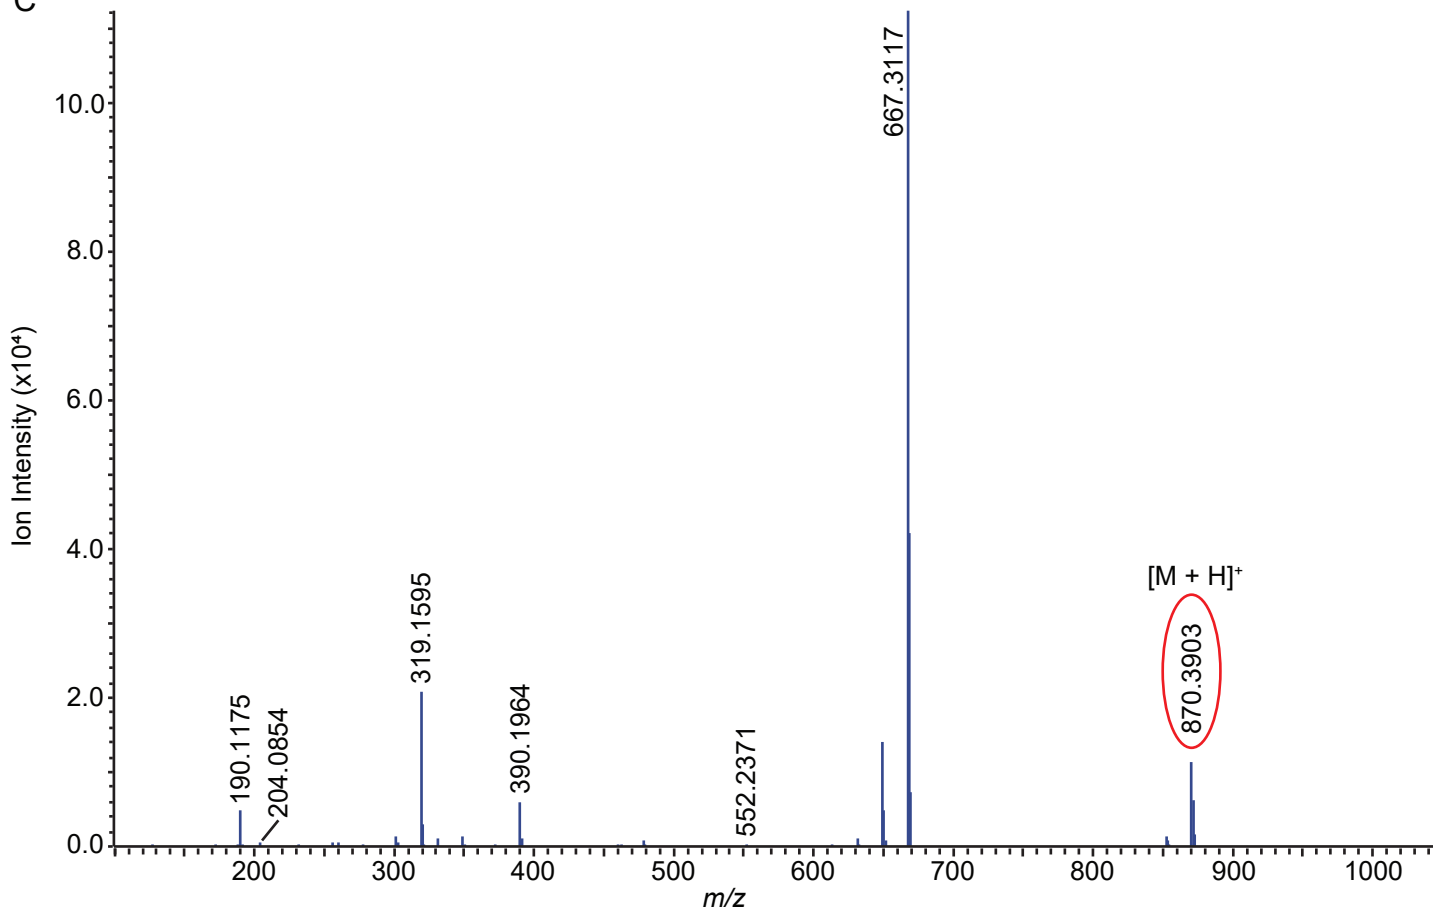

Supplemental Figure 3: (A) MS1 spectra generated from scanning retention times of 2.788-3.162 minutes. (B) The structure of muropeptide 2a. Cleavages with resulting  $m/z$  fragments are shown in red. (C) MS2 obtained from targeting precursor ion 870.3902  $[M+H]^+$ . Red fragments generated in B correspond to observed MS2 fragments in C.

### A Muropeptide 2b

RT:[3.235-3.488]

$[M+H]^+ = 870.3939$   
 $[M+2H]^{+2} = 435.7006$   
 $[M+Na]^+ = 892.3758$   
 $[M+H+Na]^{+2} = 446.6915$

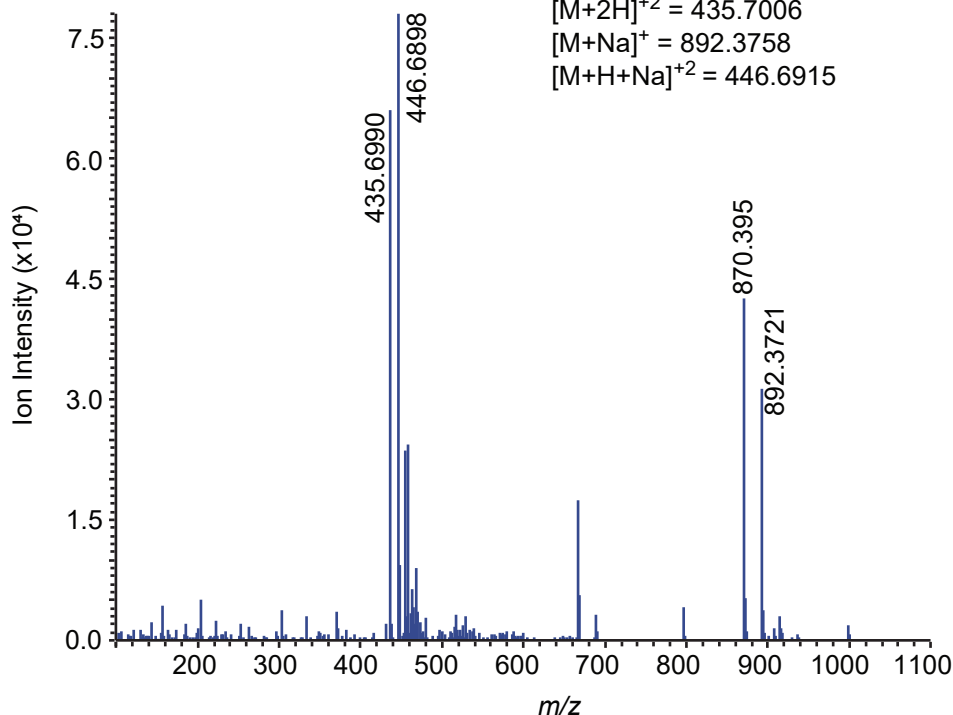

### B

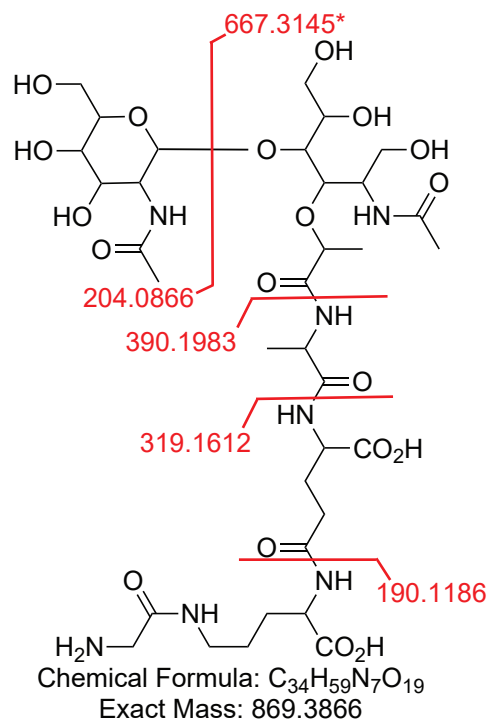

\*NaBD<sub>4</sub> reduction increases  $m/z$  by 1.006

### C

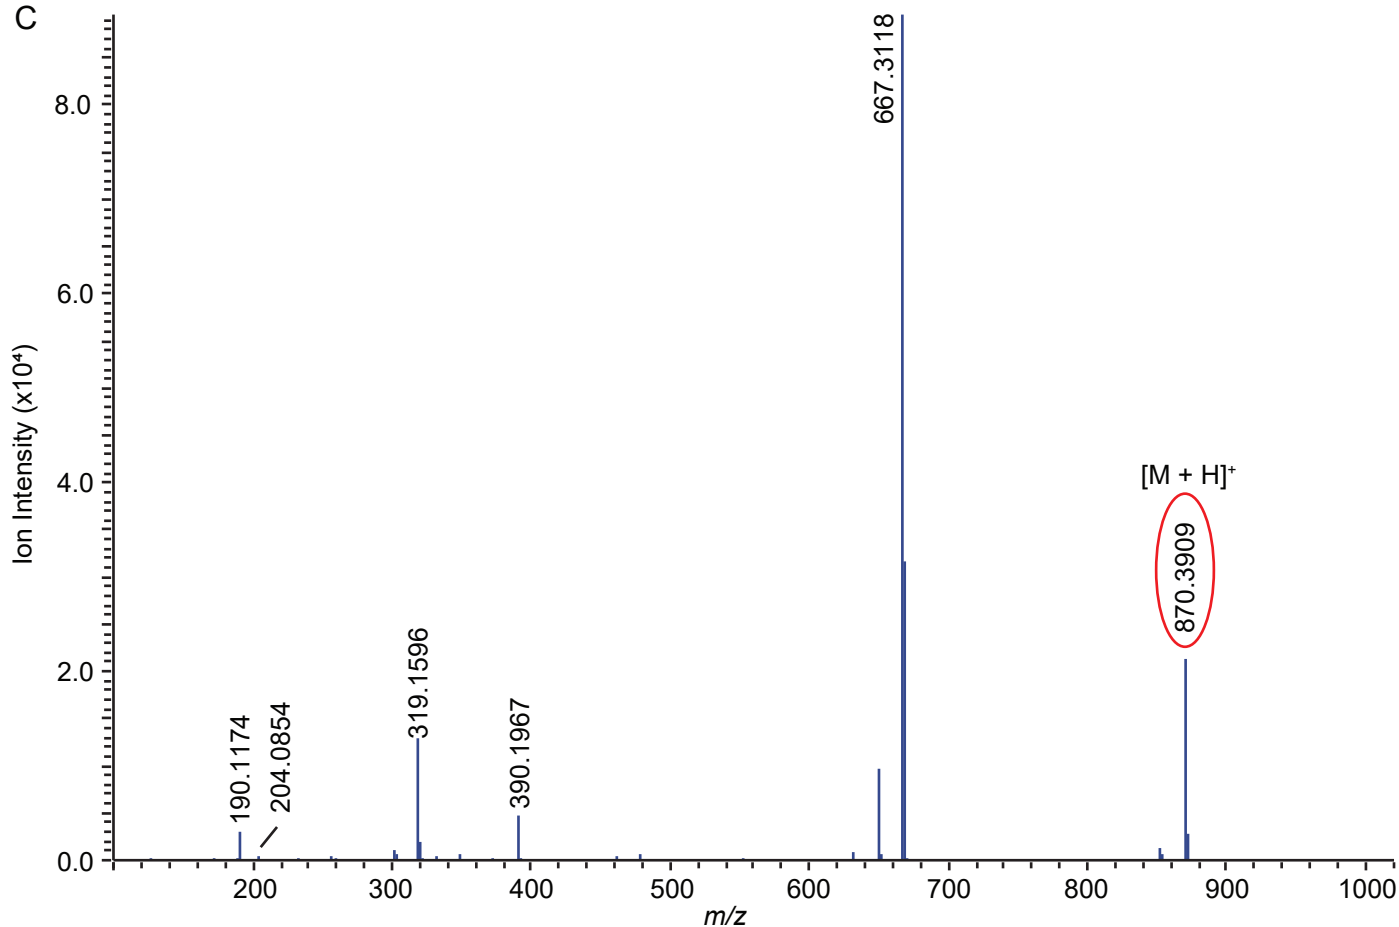

Supplemental Figure 4: (A) MS1 spectra generated from scanning retention times of 3.235-3.488 minutes. (B) The structure of muropeptide 2b. Cleavages with resulting  $m/z$  fragments are shown in red. (C) MS2 obtained from targeting precursor ion 870.3902  $[M+H]^+$ . Red fragments generated in B correspond to observed MS2 fragments in C.



### A Muropeptide 3

RT:[6.495-6.735]

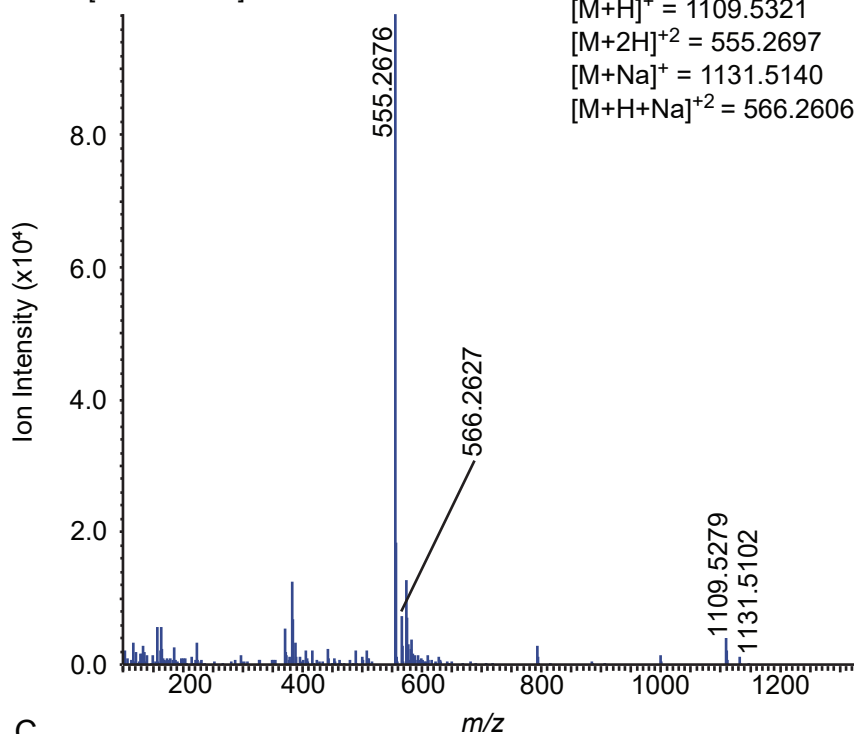

### B

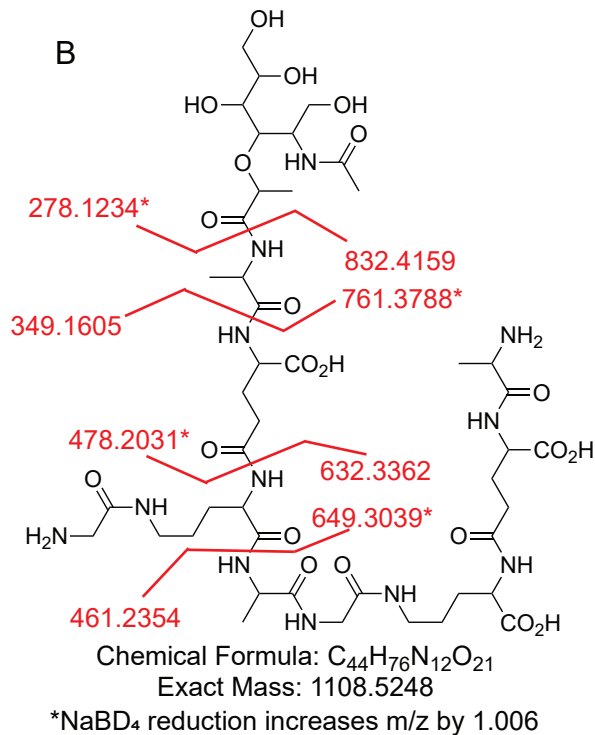

### C

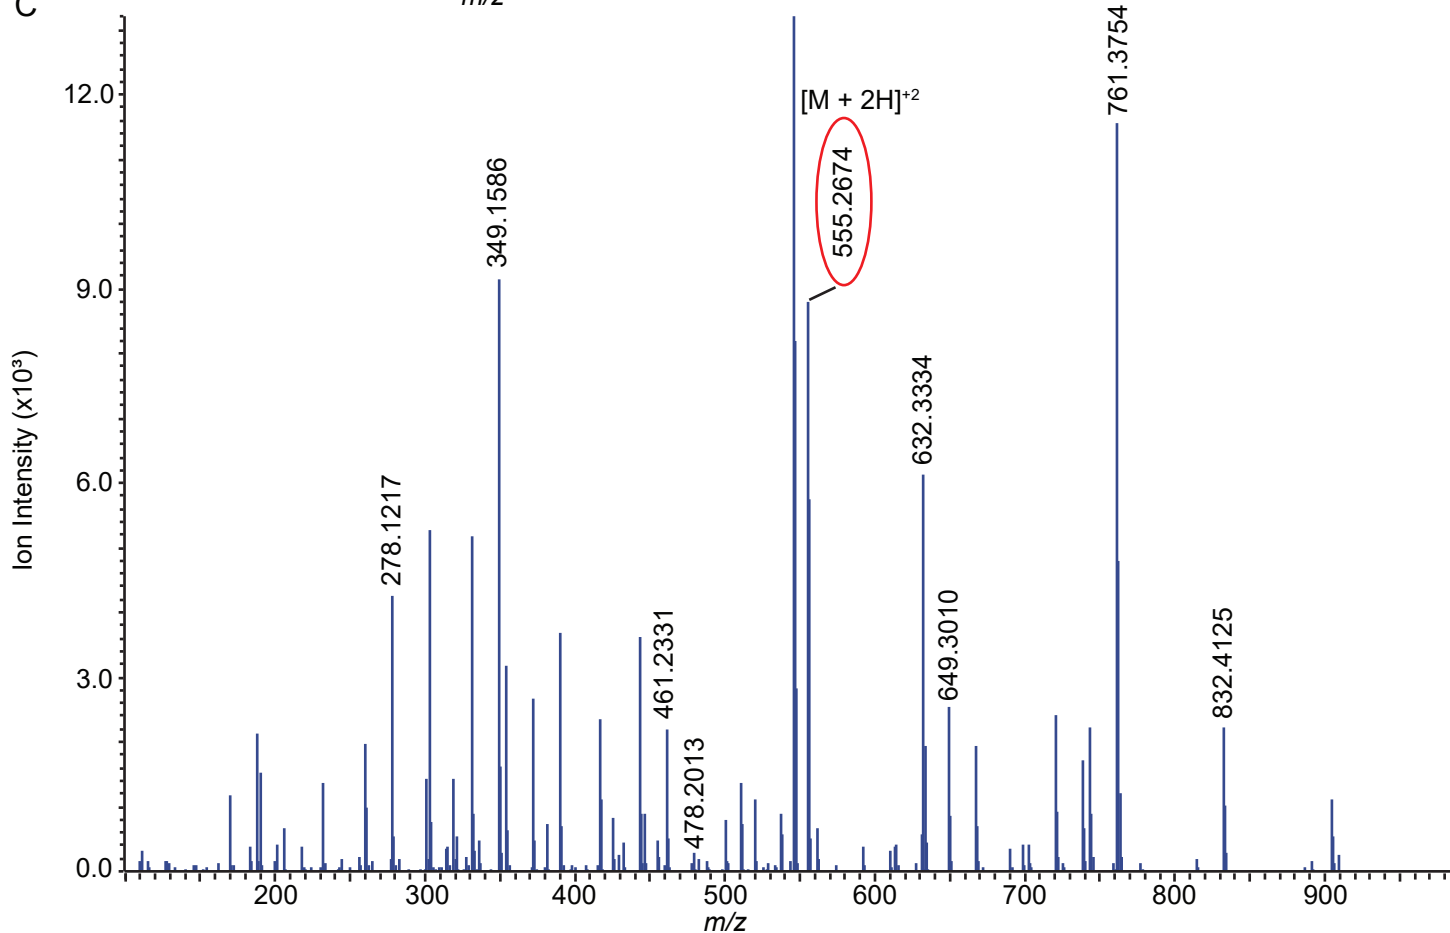

Supplemental Figure 5: (A) MS1 spectra generated from scanning retention times of 6.495-6.735 minutes. (B) The structure of muropeptide 3. Cleavages with resulting  $m/z$  fragments are shown in red. (C) MS2 obtained from targeting precursor ion 555.2676  $[M+2H]^{+2}$ . Red fragments generated in B correspond to observed MS2 fragments in C.

### A Muropeptide 4

RT:[7.575-8.042]

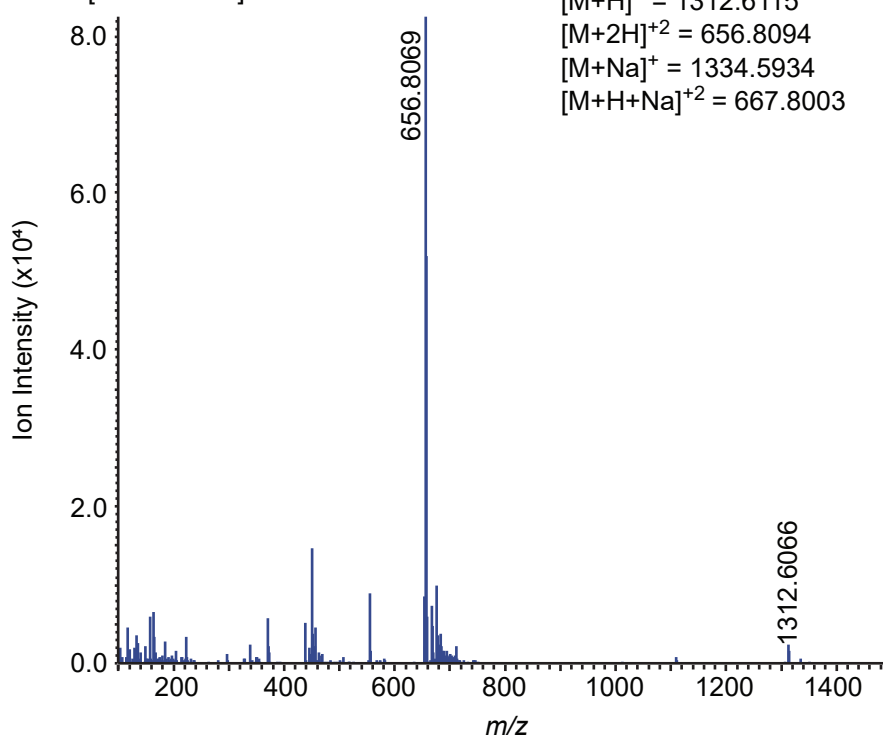

### B

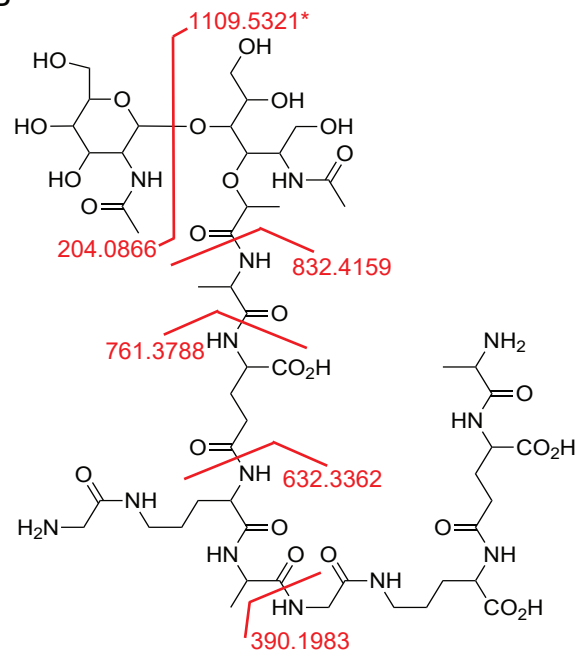

### C

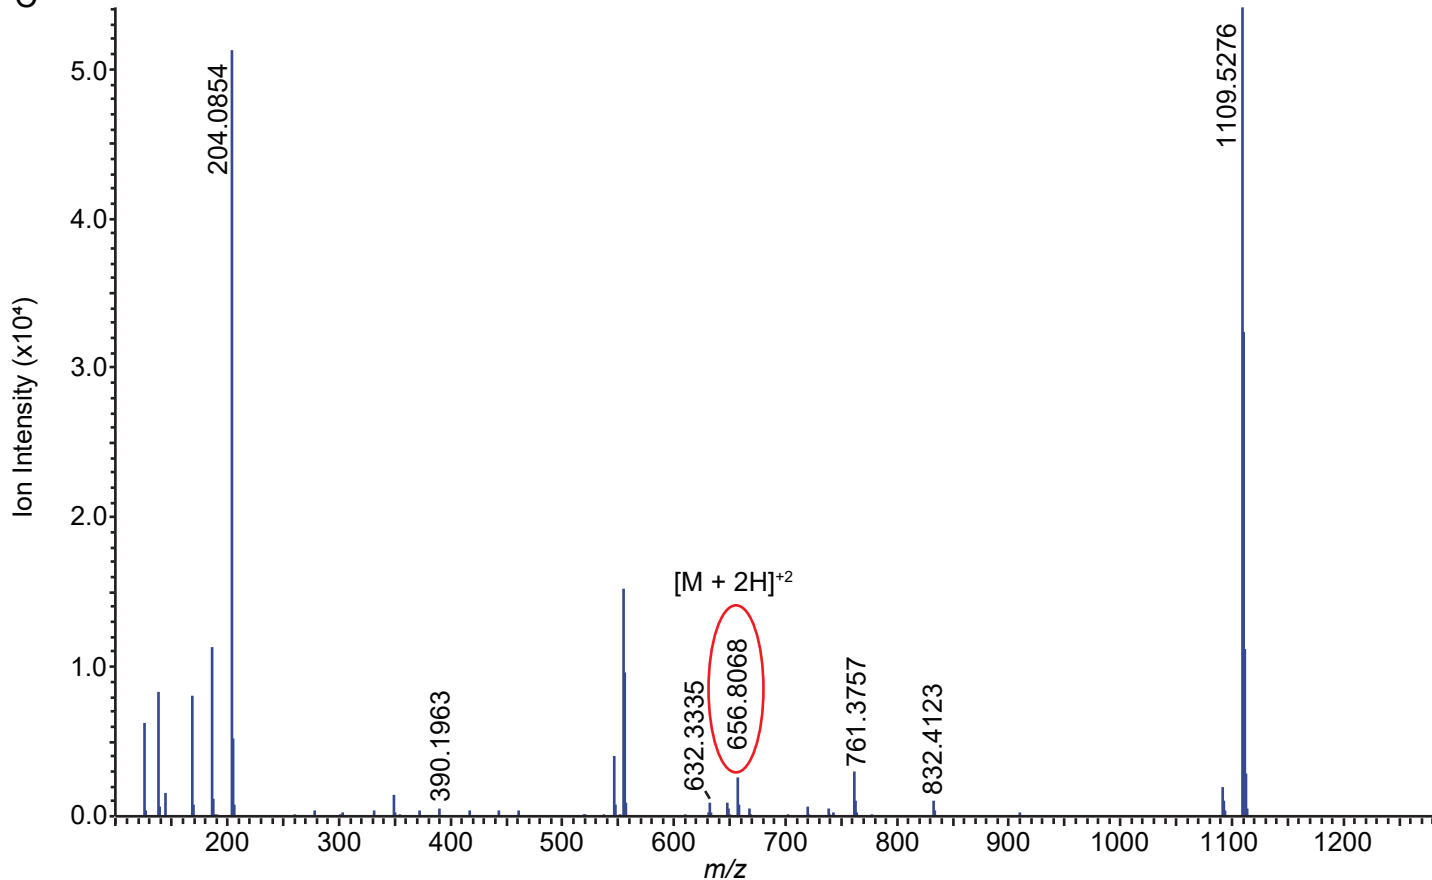

Supplemental Figure 6: (A) MS1 spectra generated from scanning retention times of 7.575-8.042 minutes. (B) The structure of muropeptide 4. Cleavages with resulting *m/z* fragments are shown in red. (C) MS2 obtained from targeting precursor ion 656.8094  $[M + 2H]^{+2}$ . Red fragments generated in B correspond to observed MS2 fragments in C.

### A Muropptide 5

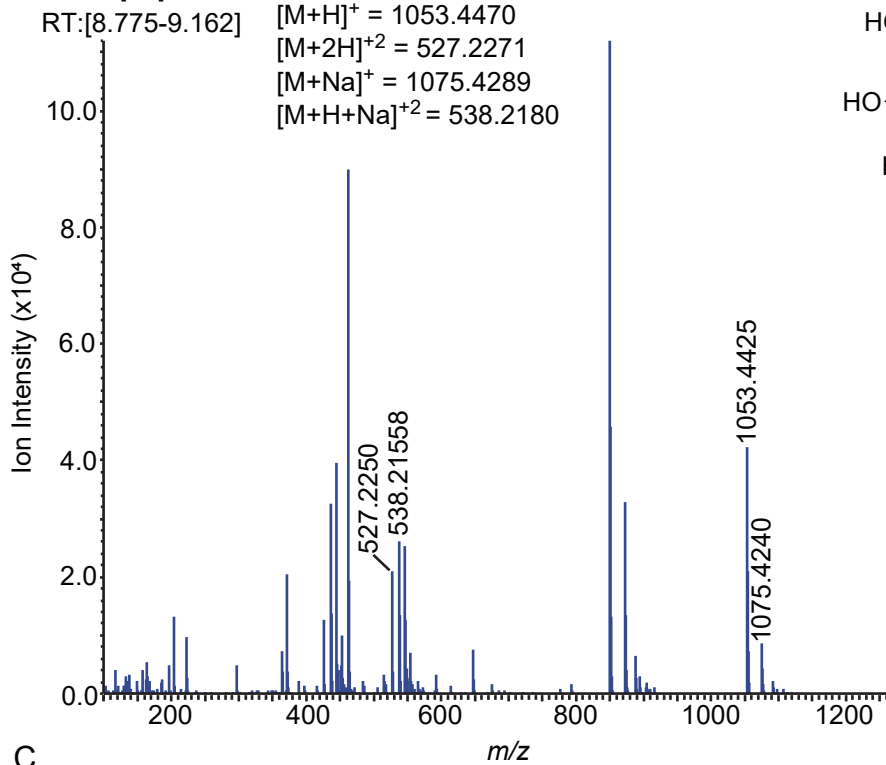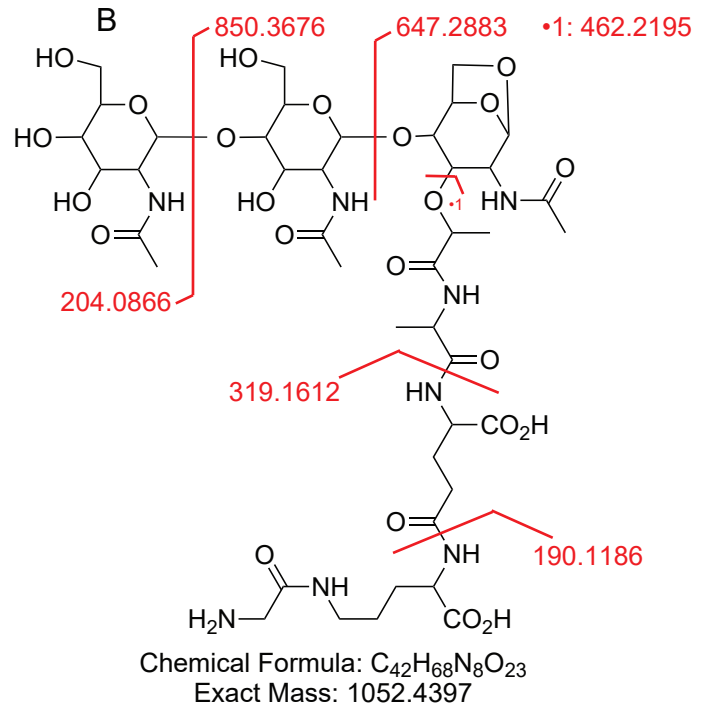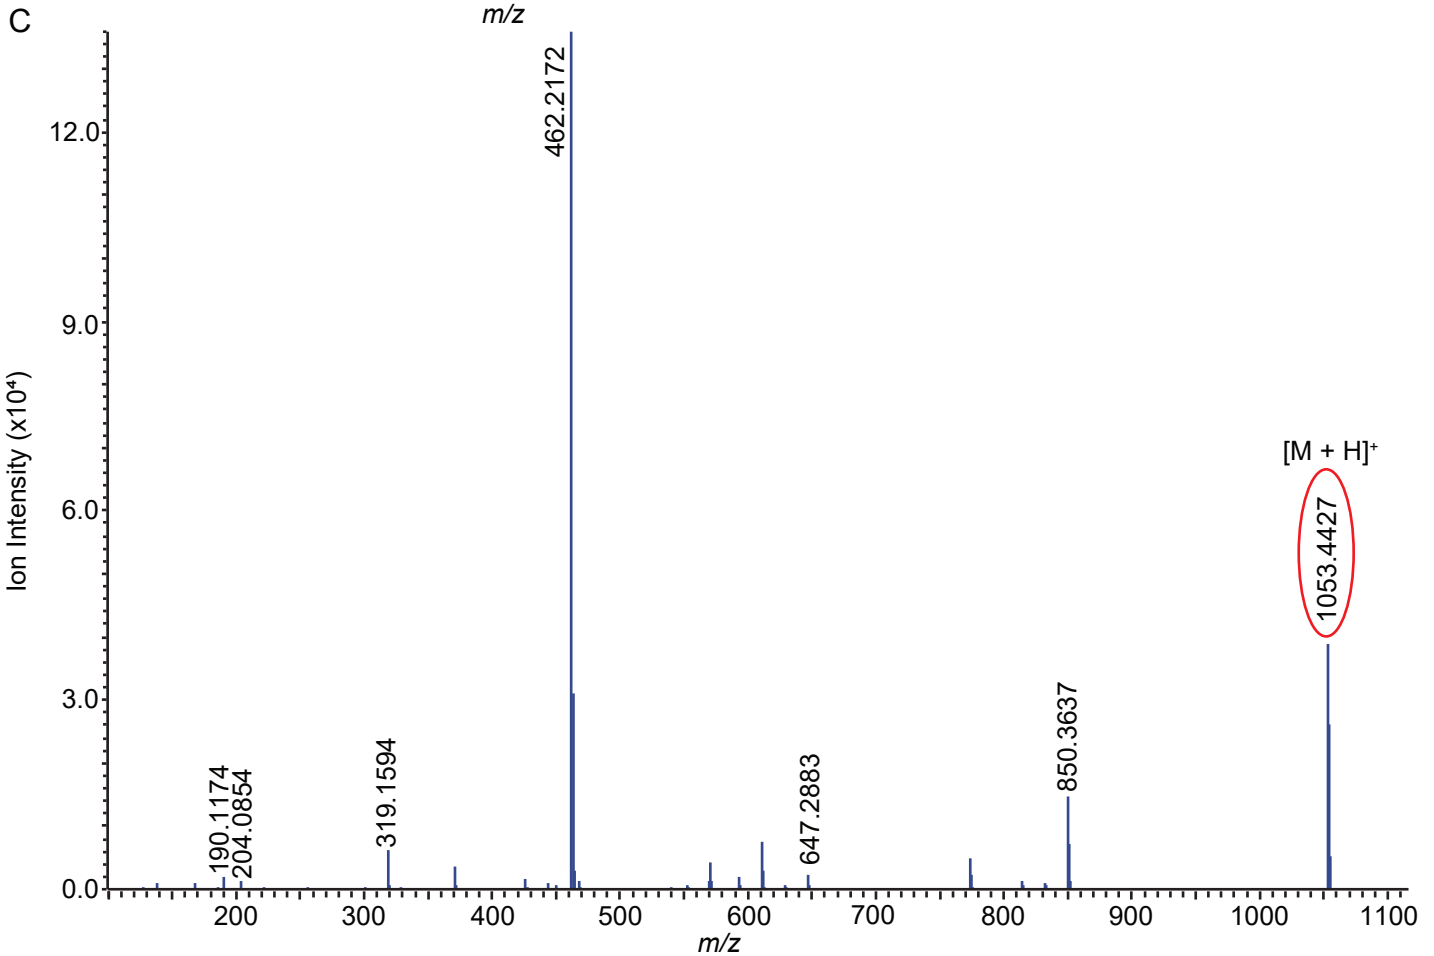

Supplemental Figure 7: (A) MS1 spectra generated from scanning retention times of 8.775-9.162 minutes. (B) The structure of muropptide 5. Cleavages with resulting  $m/z$  fragments are shown in red. (C) MS2 obtained from targeting precursor ion 1053.4426 [M+H]<sup>+</sup>. Red fragments generated in B correspond to observed MS2 fragments in C.

### A Muropeptide 6a

RT:[8.775-9.162]

$[M+H]^+ = 850.3676$   
 $[M+2H]^{+2} = 425.6875$   
 $[M+Na]^+ = 872.3496$   
 $[M+H+Na]^{+2} = 436.6790$

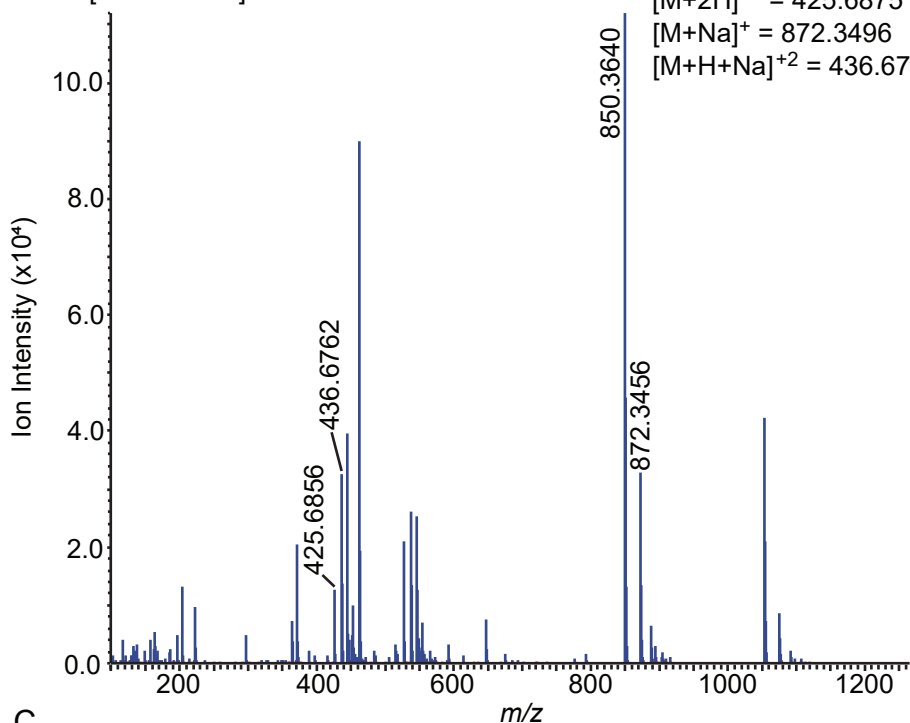

### B

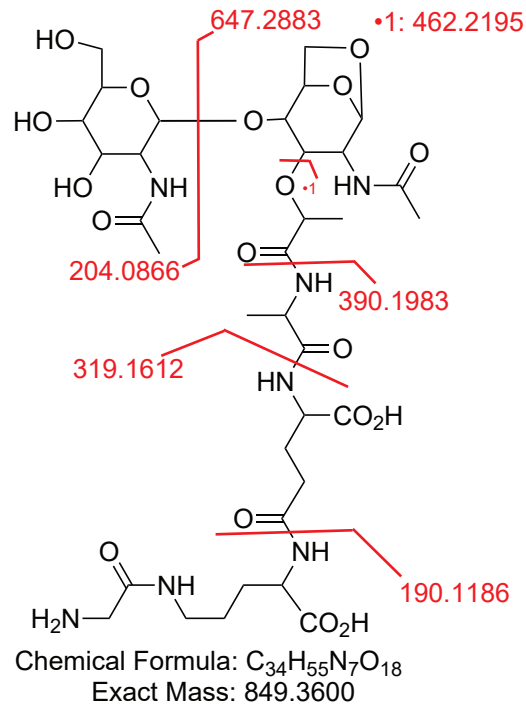

### C

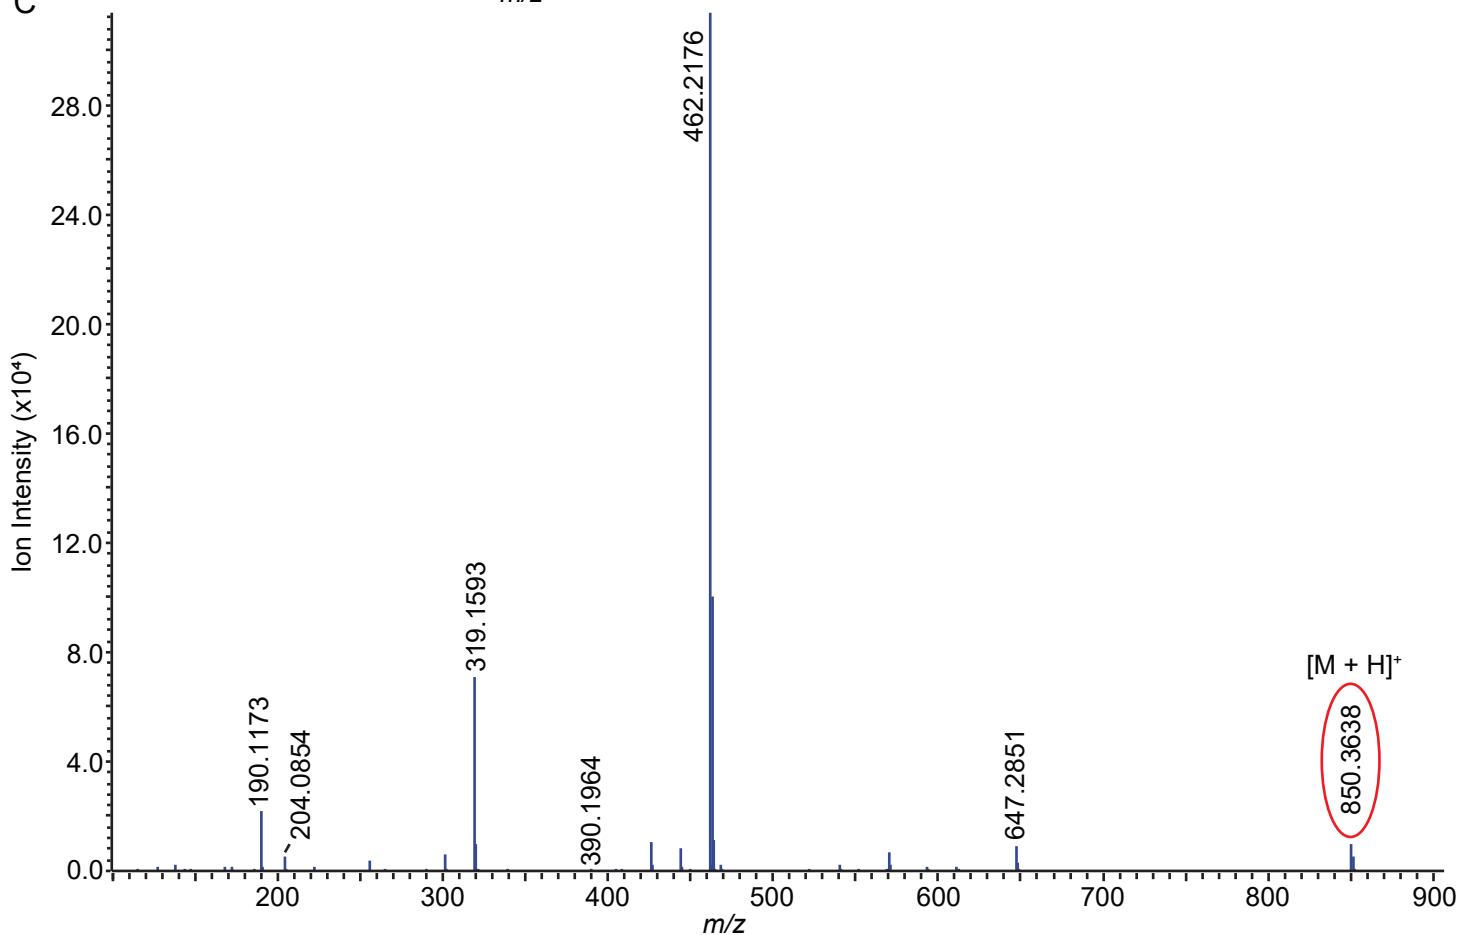

Supplemental Figure 8: (A) MS1 spectra generated from scanning retention times of 8.775-9.162 minutes. (B) The structure of muropeptide 6a. Cleavages with resulting  $m/z$  fragments are shown in red. (C) MS2 obtained from targeting precursor ion 850.3676  $[M+H]^+$ . Red fragments generated in B correspond to observed MS2 fragments in C.

### A Muropeptide 6b

RT:[11.352-11.577]

$[M+H]^+ = 850.3676$   
 $[M+2H]^{+2} = 425.6875$   
 $[M+Na]^+ = 872.3496$   
 $[M+H+Na]^{+2} = 436.6790$

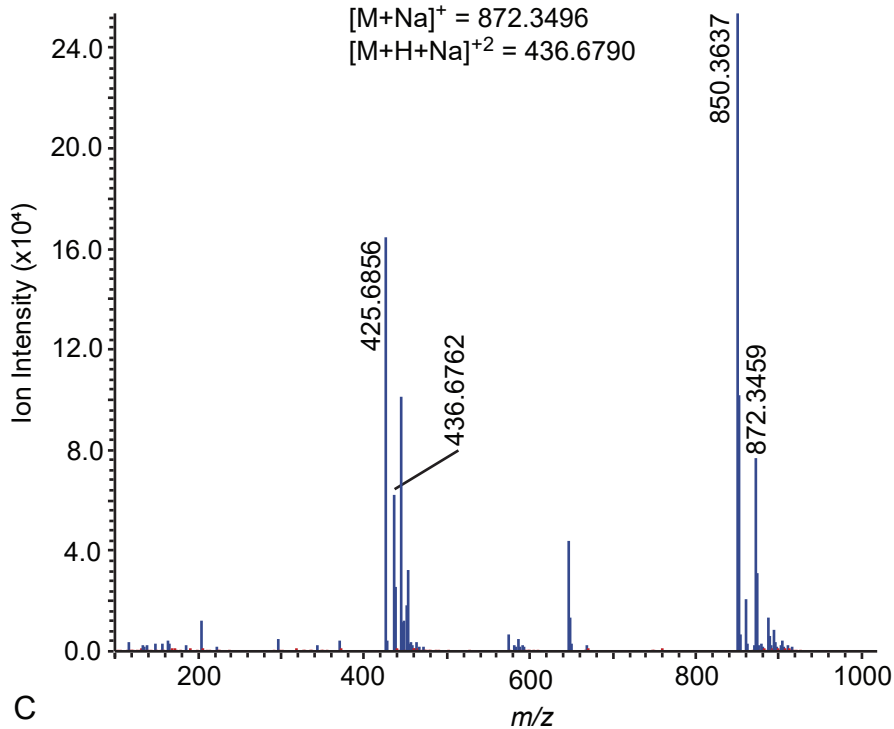

### B

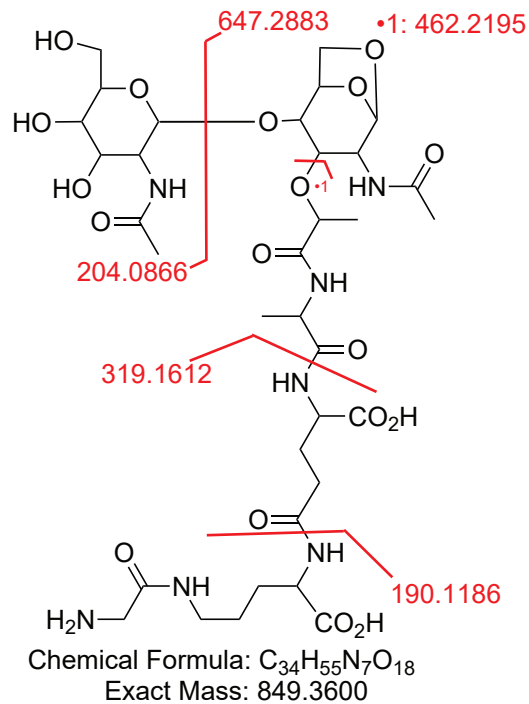

### C

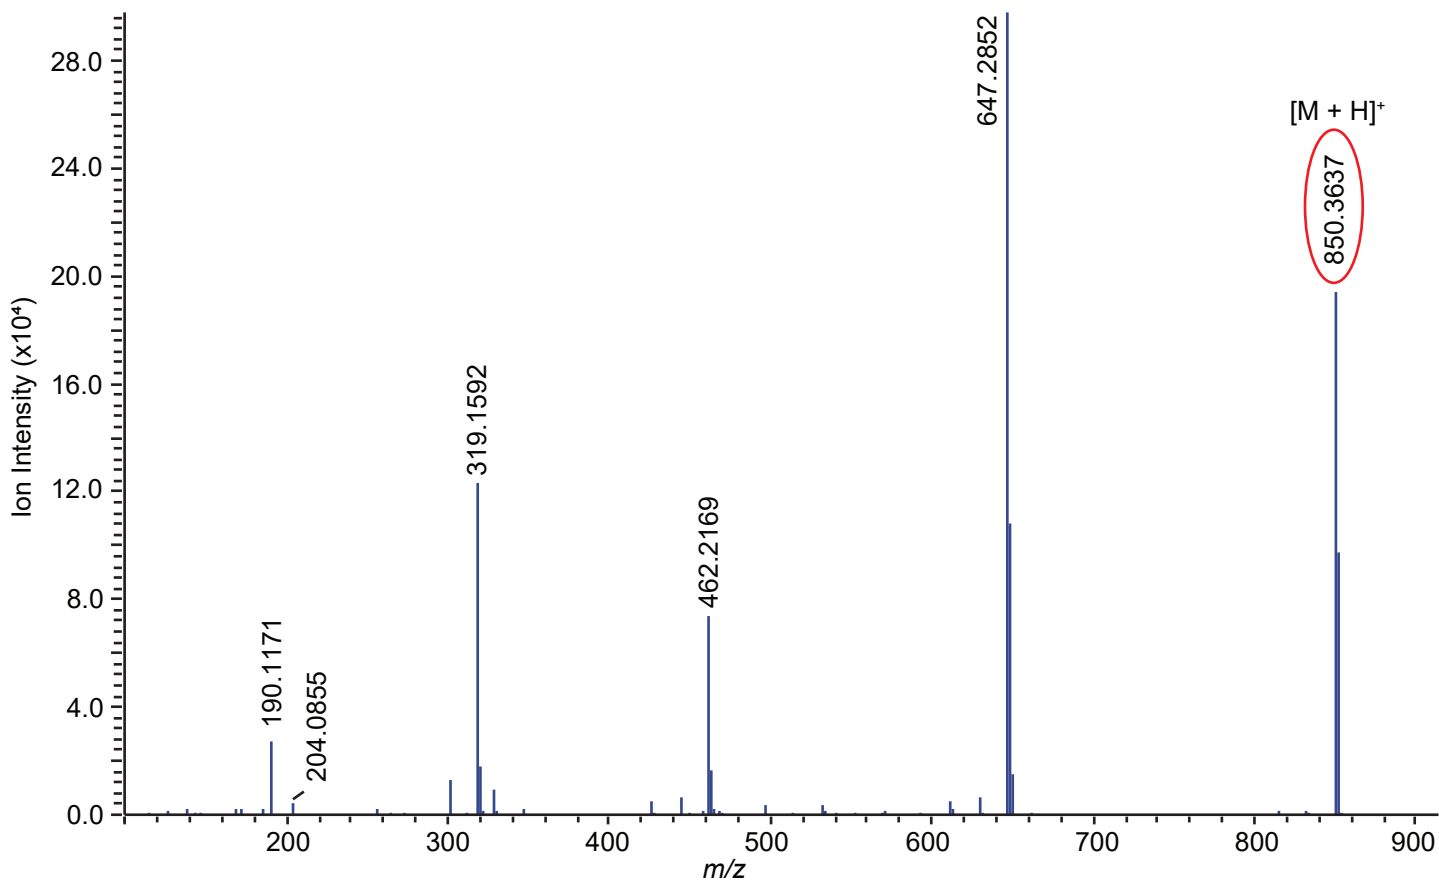

Supplemental Figure 9: (A) MS1 spectra generated from scanning retention times of 11.352-11.577 minutes. (B) The structure of muropeptide 6b. Cleavages with resulting m/z fragments are shown in red. (C) MS2 obtained from targeting precursor ion 850.3676 [M+H]<sup>+</sup>. Red fragments generated in B correspond to observed MS2 fragments in C.

### A Muropeptide 7

RT:[11.527-11.727]

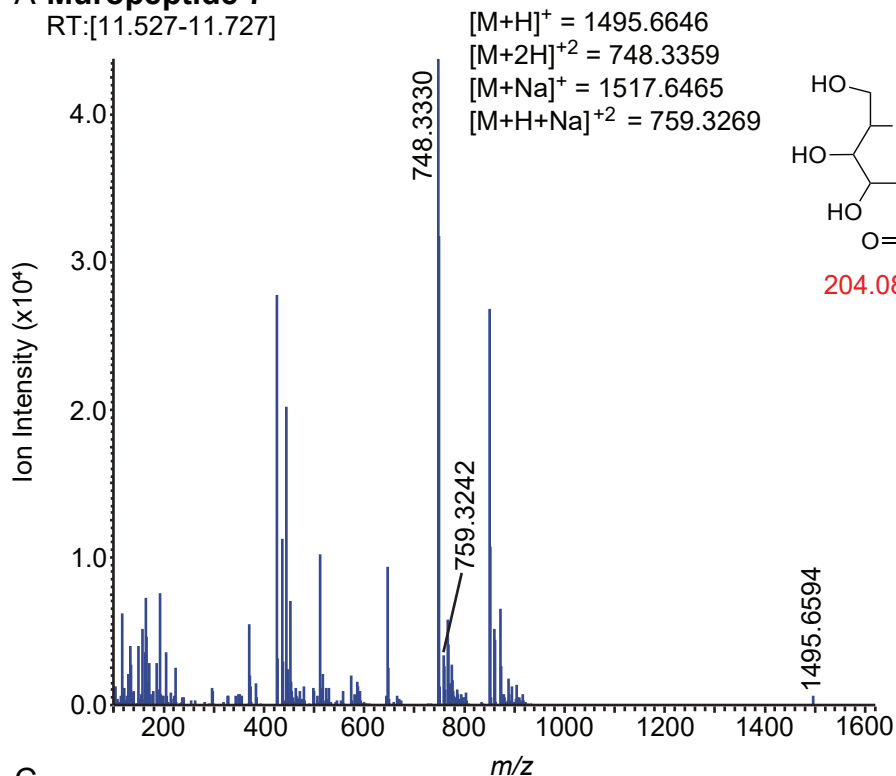

### B

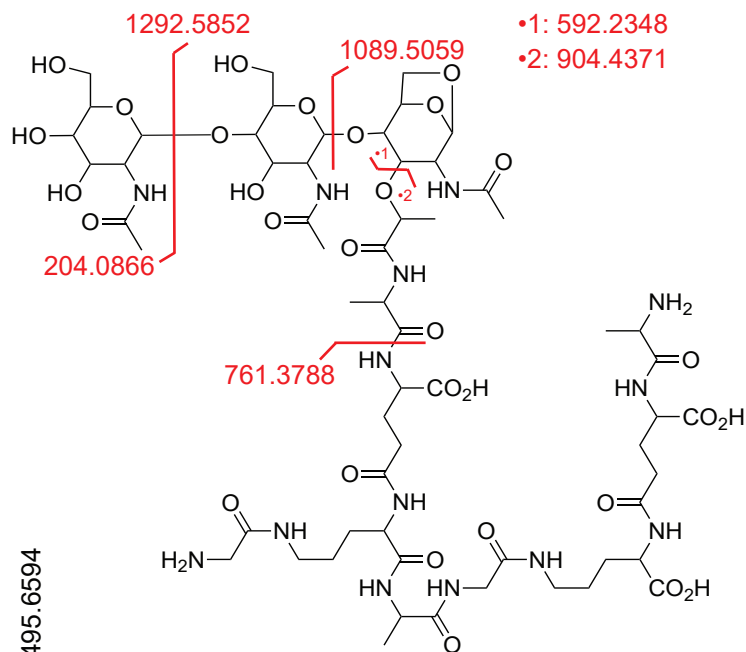

Chemical Formula:  $C_{60}H_{98}N_{14}O_{30}$   
Exact Mass: 1494.6573

### C

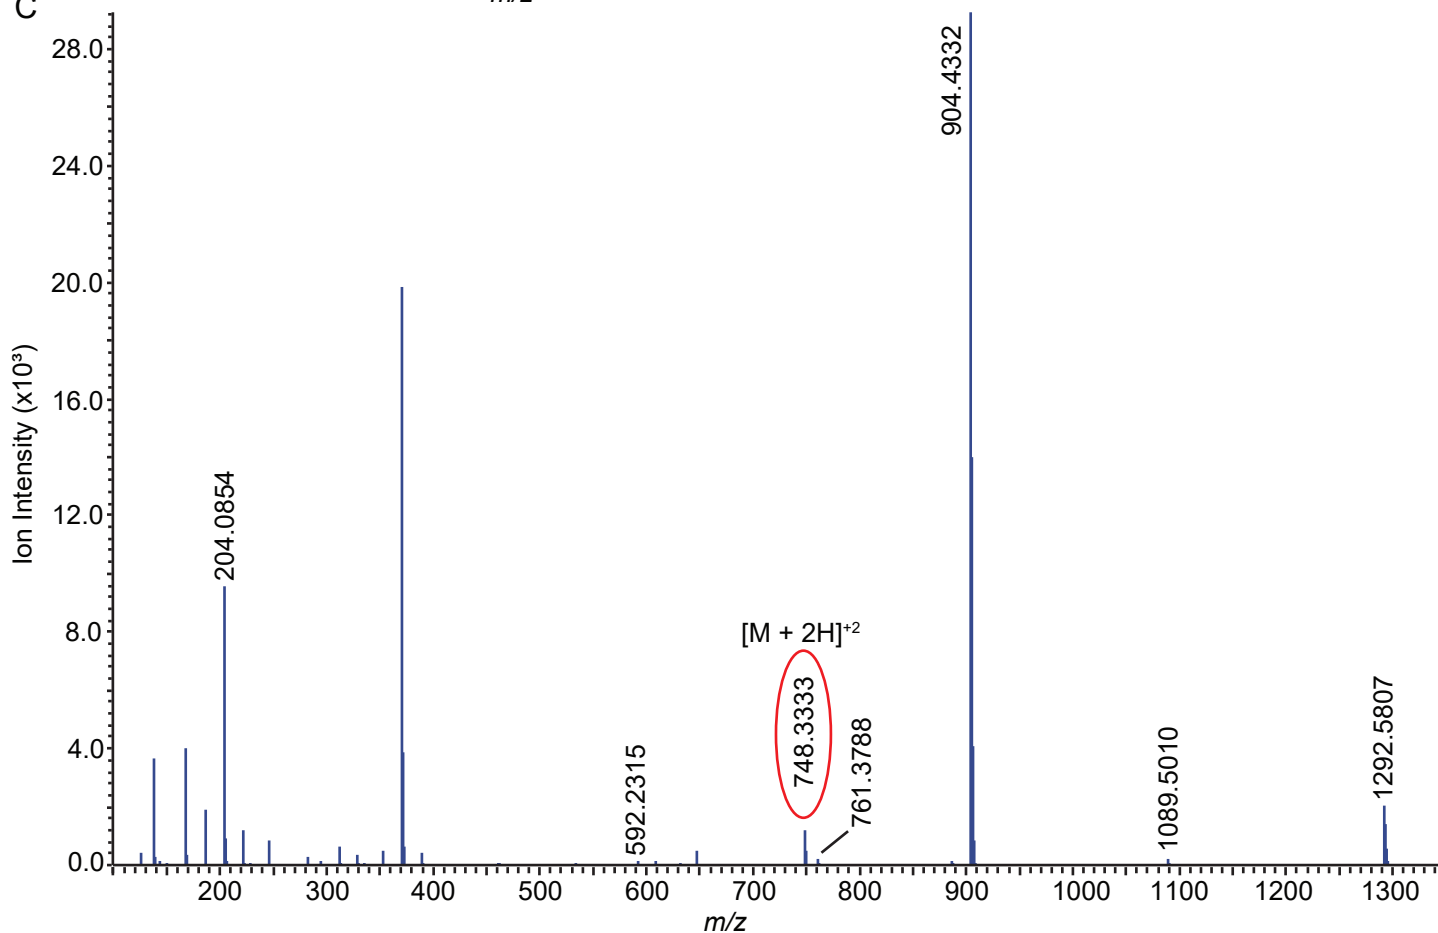

Supplemental Figure 10: (A) MS1 spectra generated from scanning retention times of 11.527-11.727 minutes. (B) The structure of muropeptide 7. Cleavages with resulting  $m/z$  fragments are shown in red. (C) MS2 obtained from targeting precursor ion 748.3359 [M+2H]<sup>2+</sup>. Red fragments generated in B correspond to observed MS2 fragments in C.

### A Muropeptide 8a

RT:[11.827-12.027]

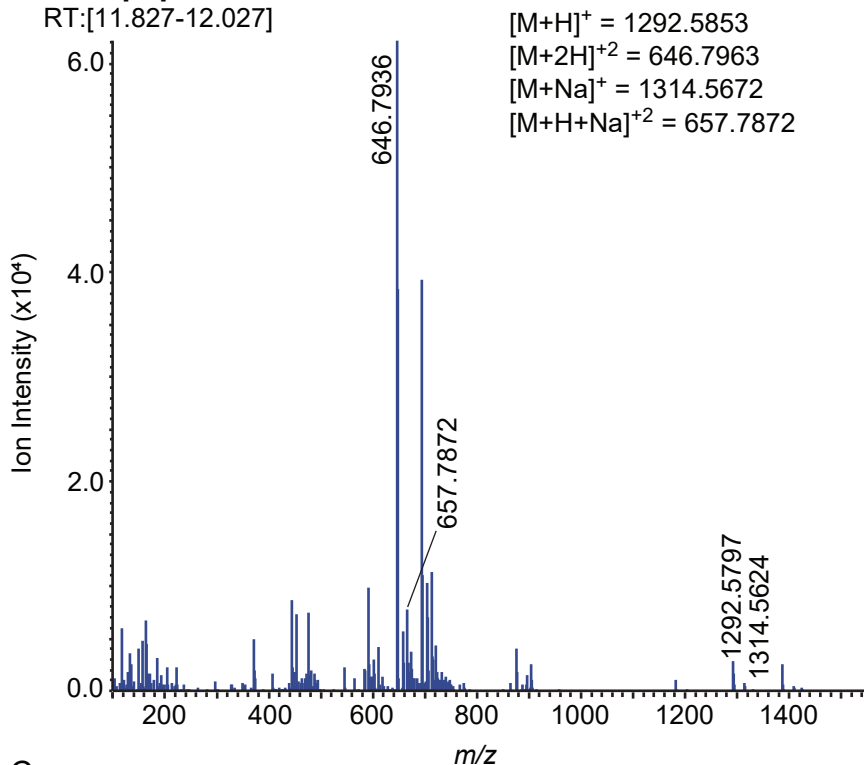

### B

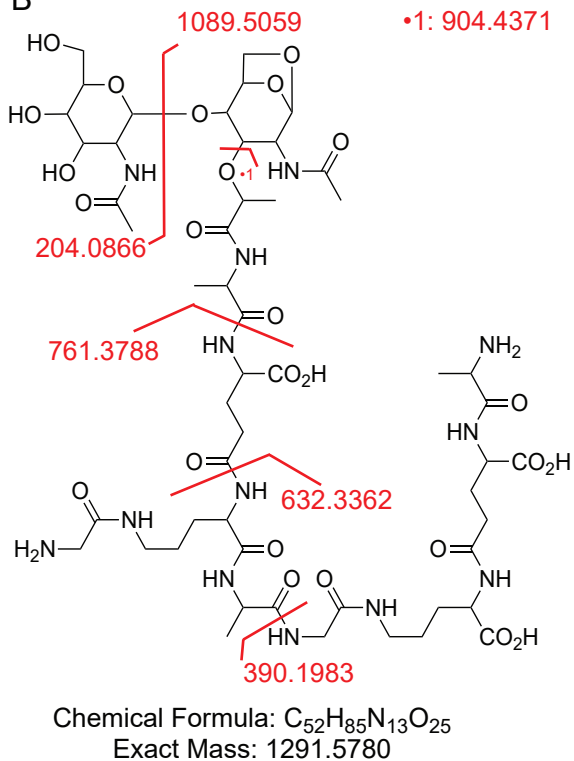

### C

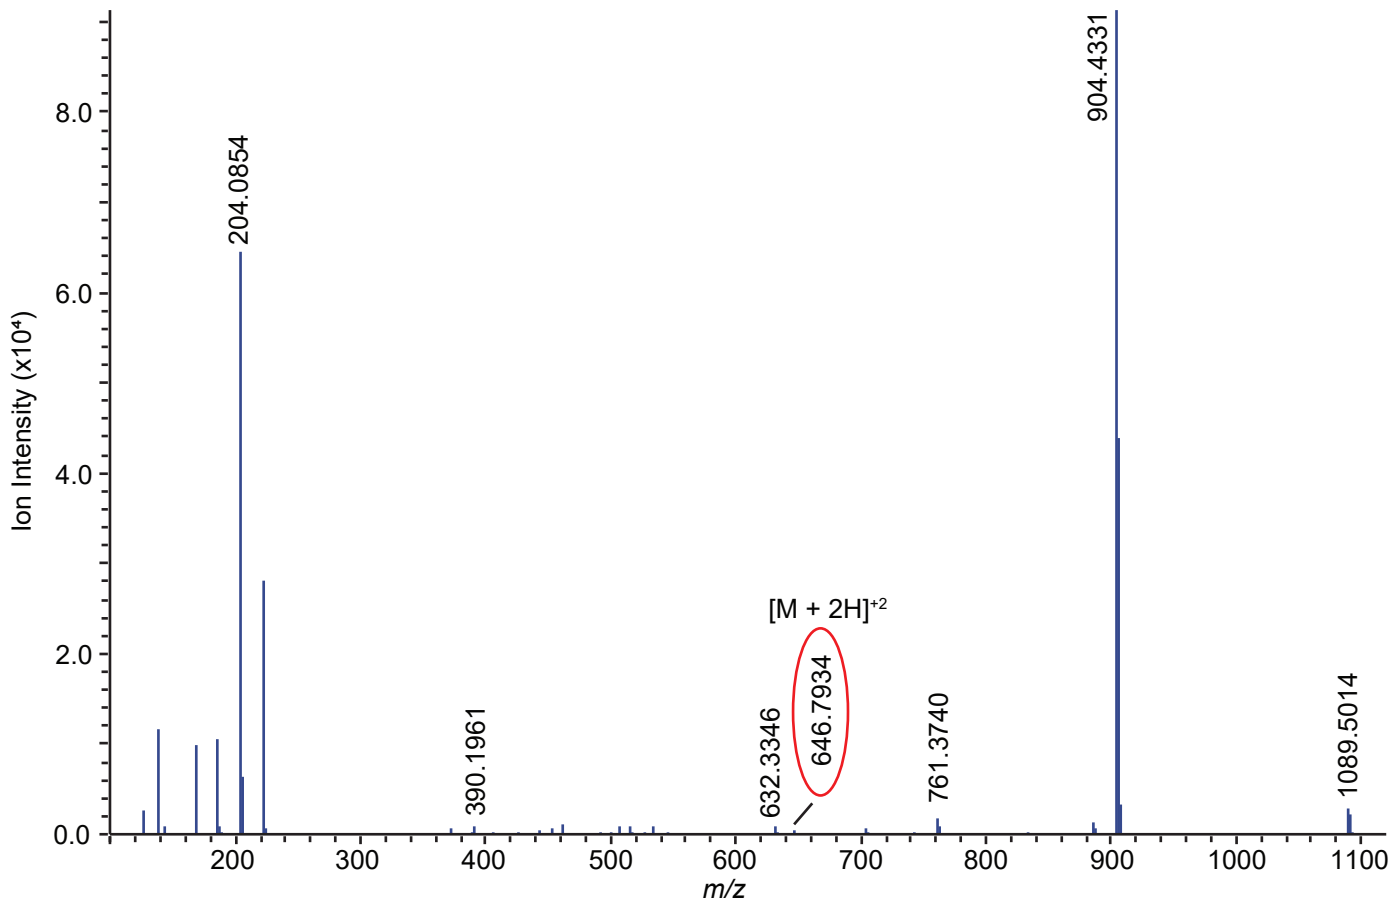

Supplemental Figure 11: (A) MS1 spectra generated from scanning retention times of 11.827-12.027 minutes. (B) The structure of muropeptide 8a. Cleavages with resulting  $m/z$  fragments are shown in red. (C) MS2 obtained from targeting precursor ion 646.7963  $[M+2H]^{+2}$ . Red fragments generated in B correspond to observed MS2 fragments in C.

### A Muropeptide 9a

RT:[11.827-12.027]

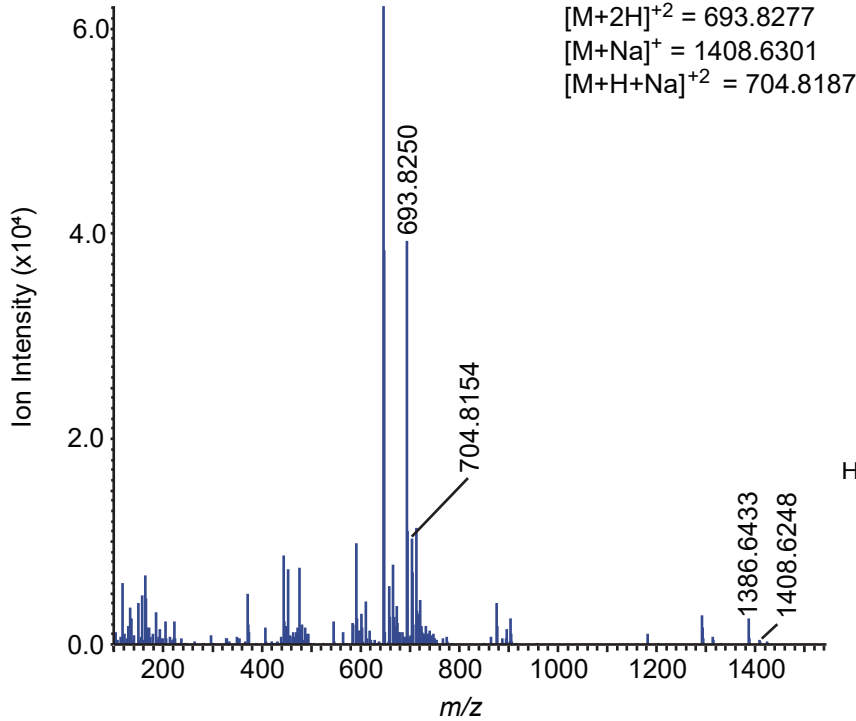

### B

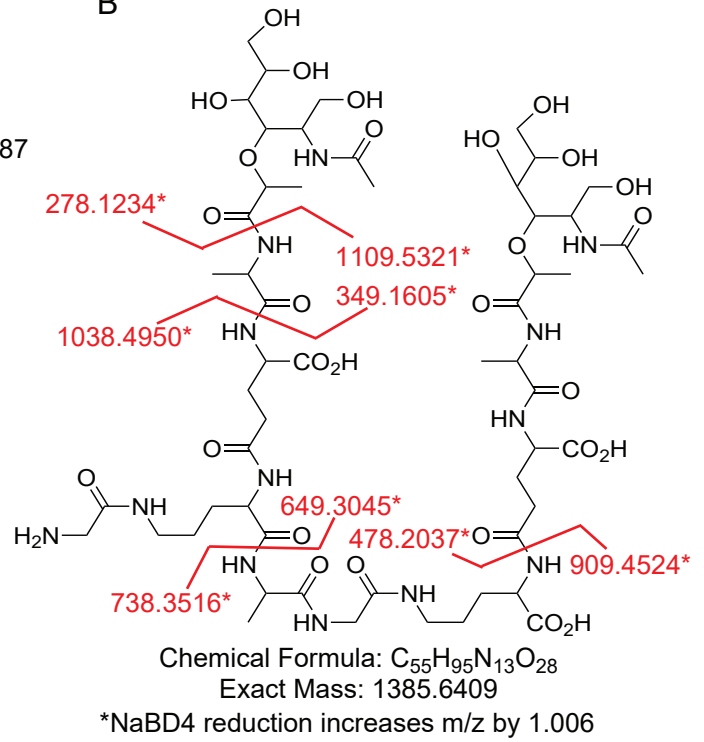

### C

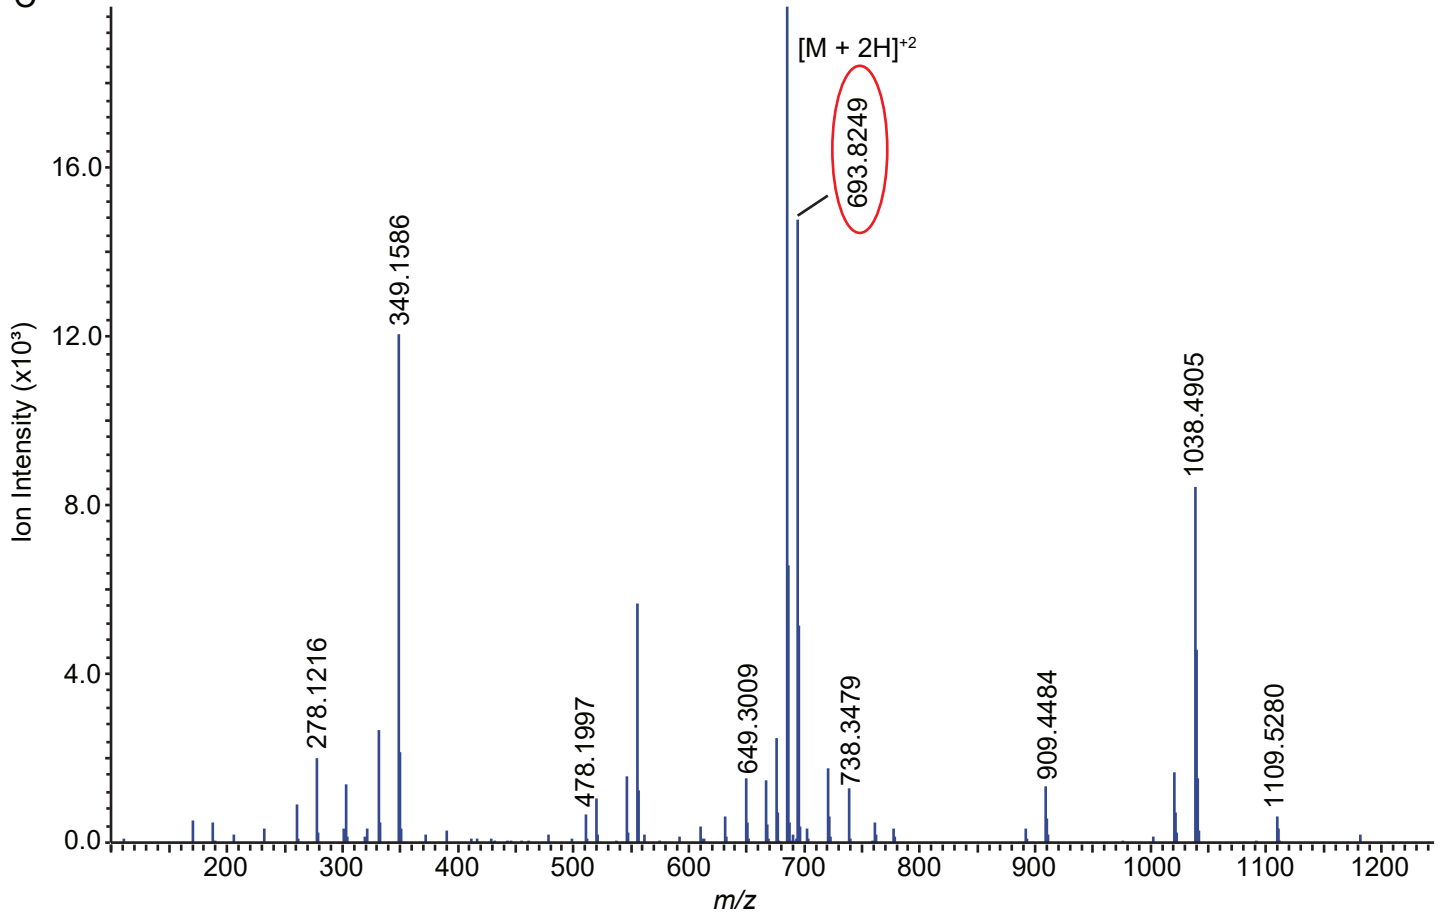

Supplemental Figure 12: (A) MS1 spectra generated from scanning retention times of 11.827-12.027 minutes. (B) The structure of muropeptide 9a. Cleavages with resulting  $m/z$  fragments are shown in red. (C) MS2 obtained from targeting precursor ion 693.8277  $[M+2H]^{+2}$ . Red fragments generated in B correspond to observed MS2 fragments in C.



**A Muropeptide 9b**

RT:[12.552-12.752]

$[M+H]^+ = 1386.6482$   
 $[M+2H]^{+2} = 693.8277$   
 $[M+Na]^+ = 1408.6301$   
 $[M+H+Na]^{+2} = 704.8187$

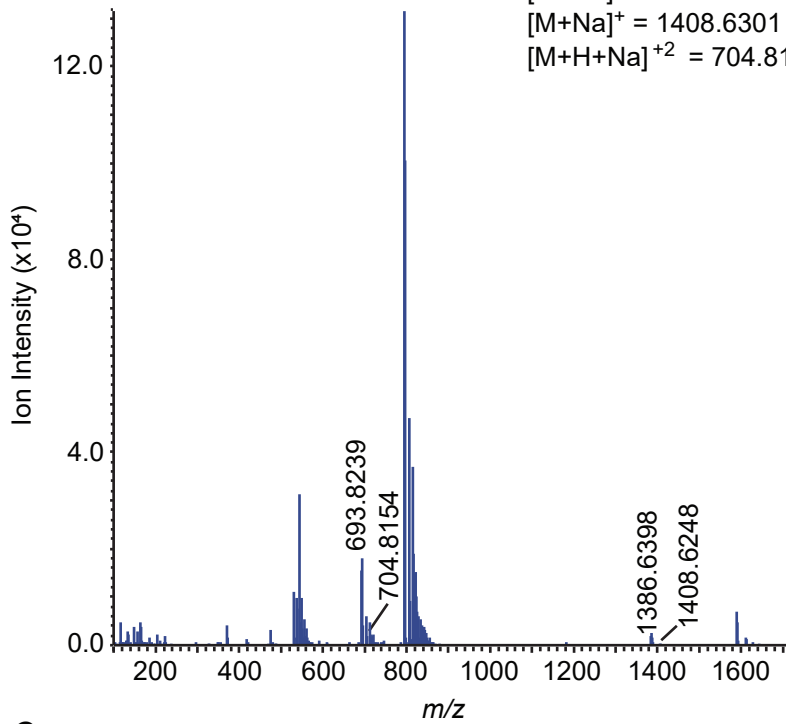**B**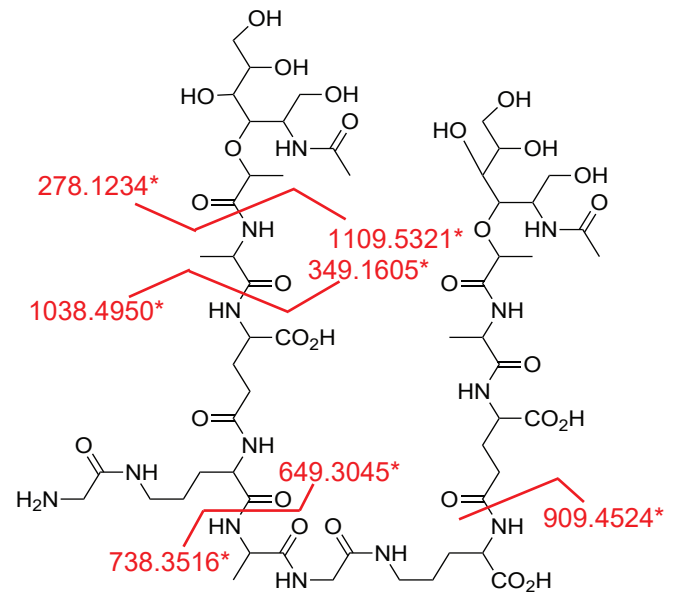

Chemical Formula: C<sub>55</sub>H<sub>95</sub>N<sub>13</sub>O<sub>28</sub>  
Exact Mass: 1385.6409

\*NaBD4 reduction increases m/z by 1.006

**C**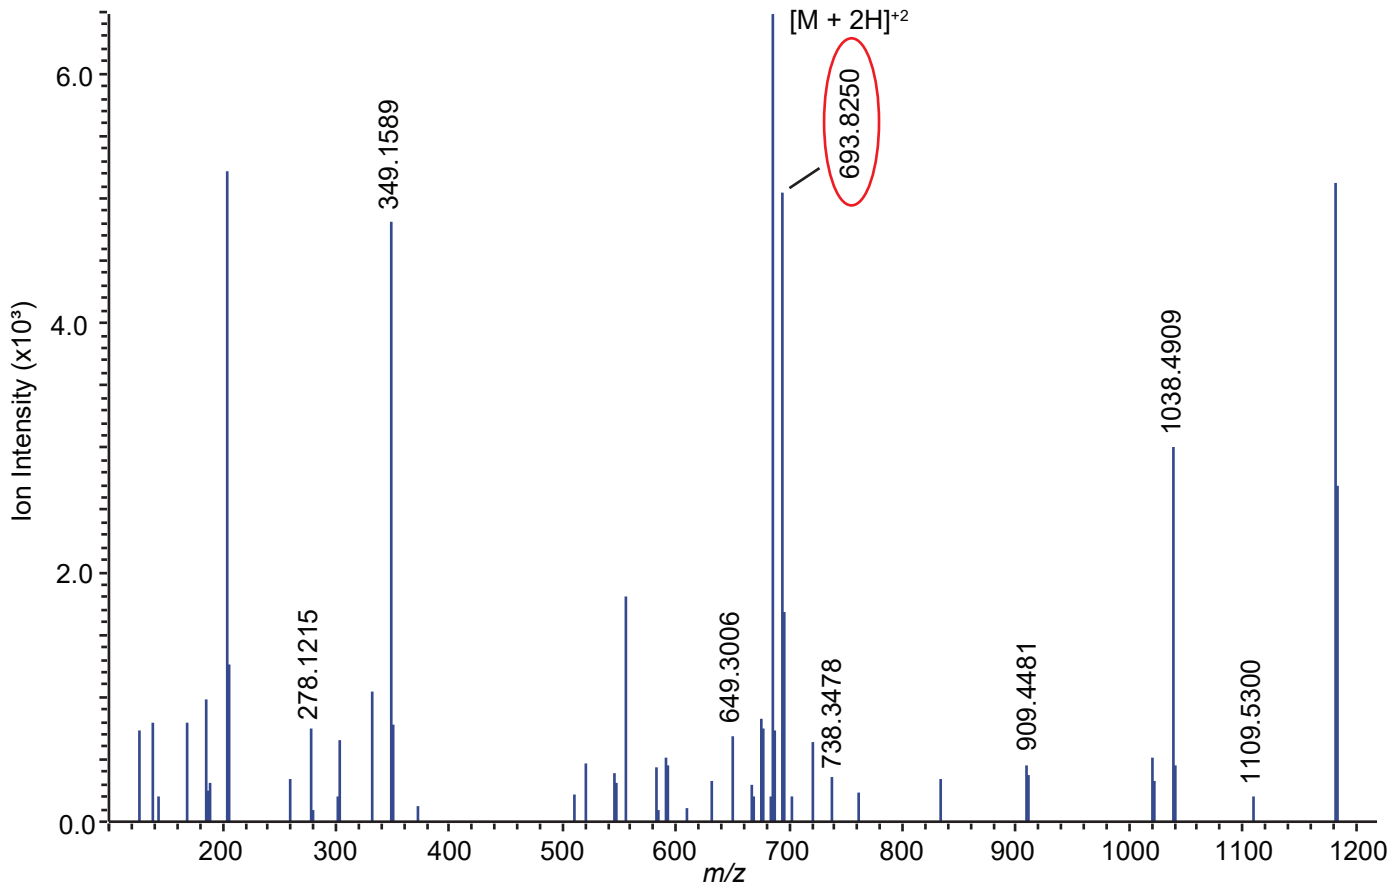

Supplemental Figure 13: (A) MS1 spectra generated from scanning retention times of 12.552-12.752 minutes. (B) The structure of muropeptide 9b. Cleavages with resulting m/z fragments are shown in red. (C) MS2 obtained from targeting precursor ion 693.8277  $[M+2H]^{+2}$ . Red fragments generated in B correspond to observed MS2 fragments in C.

### A Muropeptide 10a

RT:[12.552-12.752]

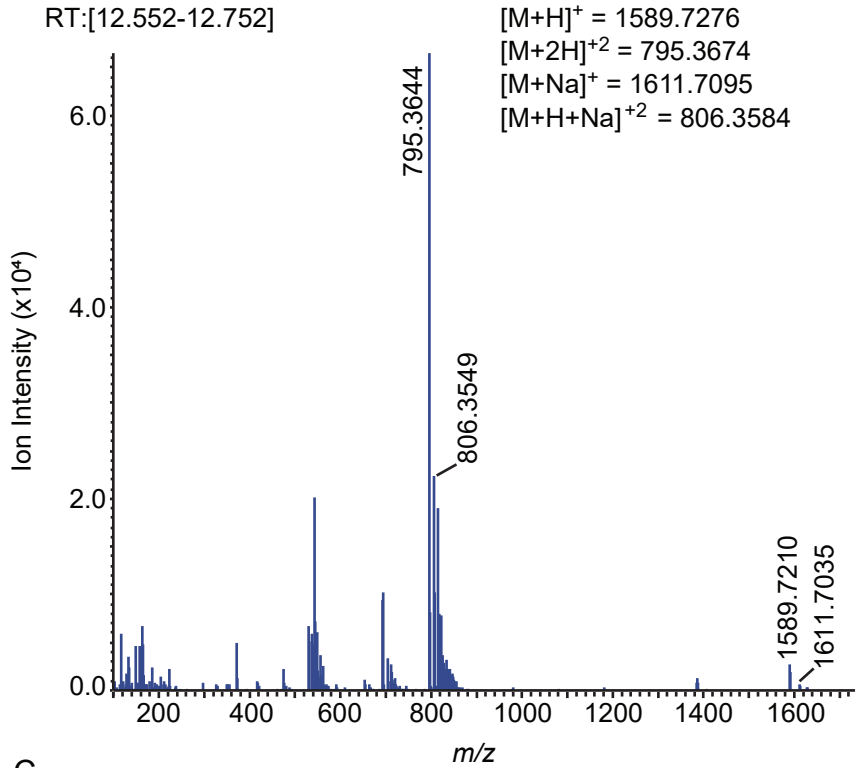

### B

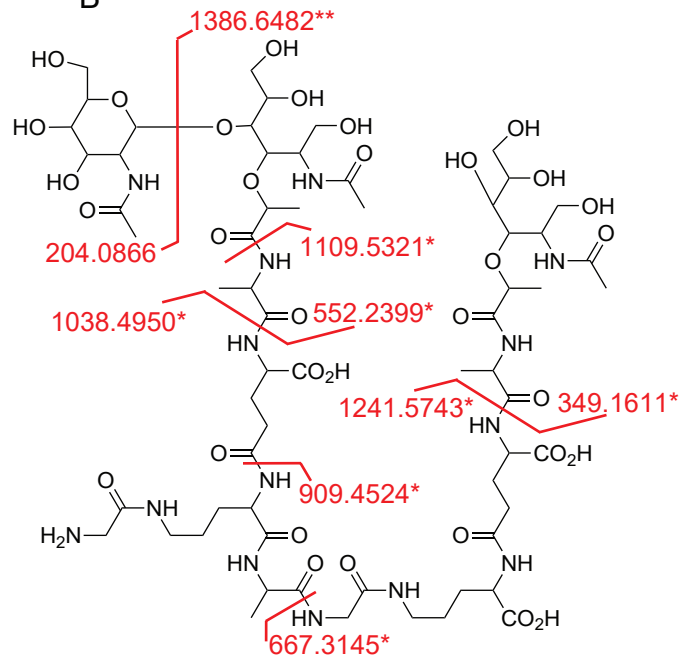

Chemical Formula: C<sub>63</sub>H<sub>108</sub>N<sub>14</sub>O<sub>33</sub>

Exact Mass: 1588.7203

\*NaBD4 reduction increases m/z by 1.006

\*\*NaBD4 reduction increases m/z by 2.012

### C

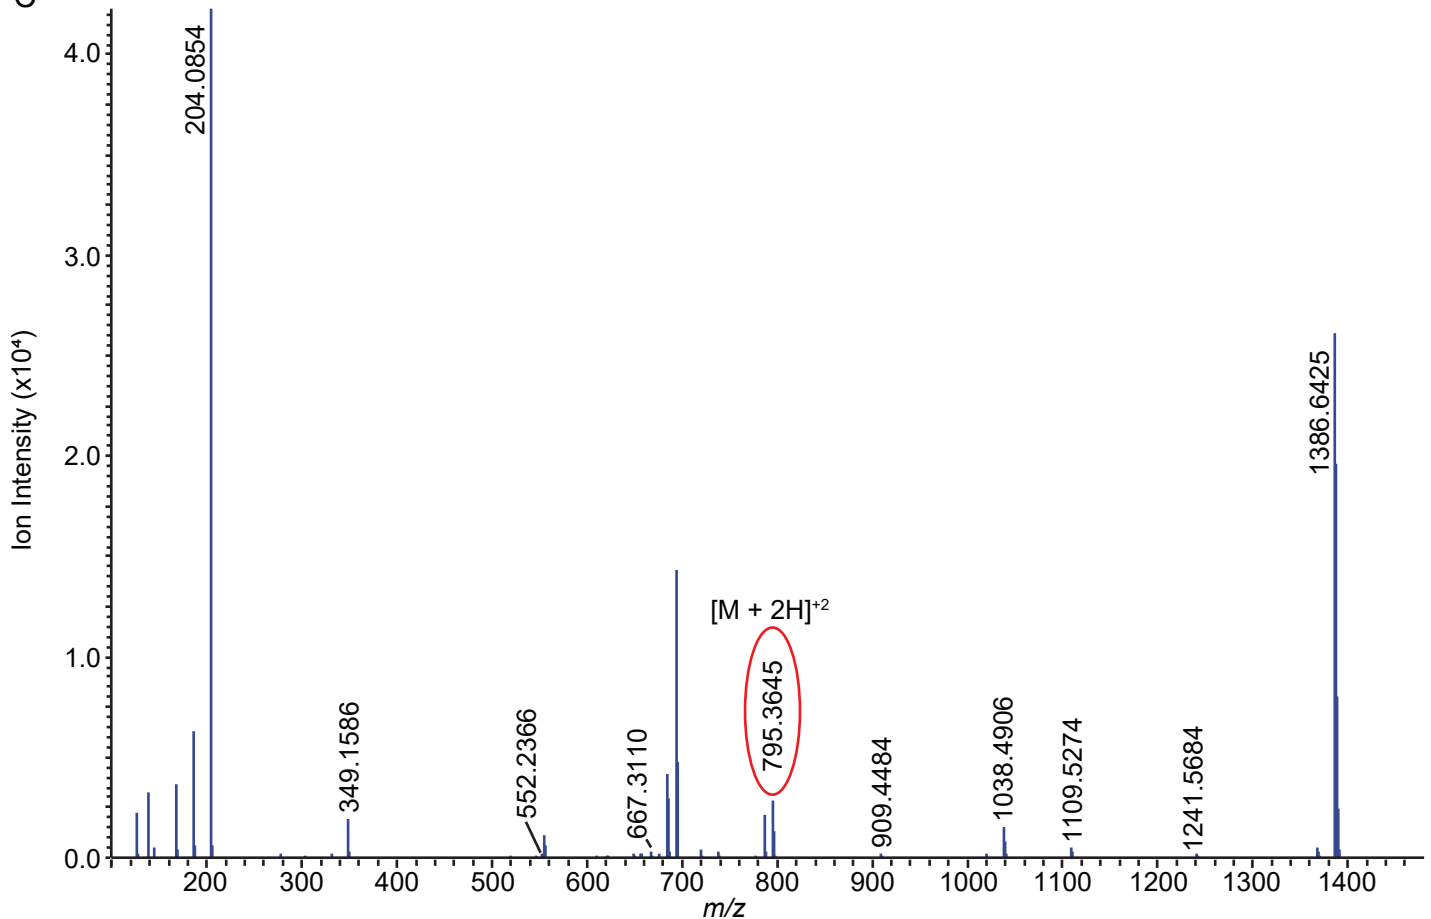

Supplemental Figure 14: (A) MS1 spectra generated from scanning retention times of 12.552-12.752 minutes. (B) The structure of muropeptide 10a. Cleavages with resulting *m/z* fragments are shown in red. (C) MS2 obtained from targeting precursor ion 795.3674  $[M+2H]^{+2}$ . Red fragments generated in B correspond to observed MS2 fragments in C.

### A Muropeptide 10b

RT:[13.127-13.427]

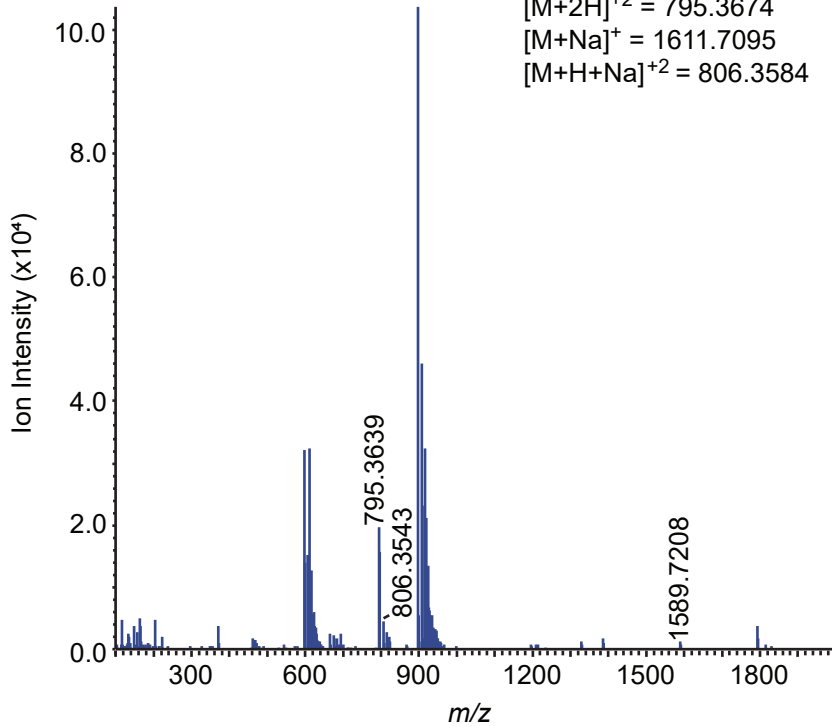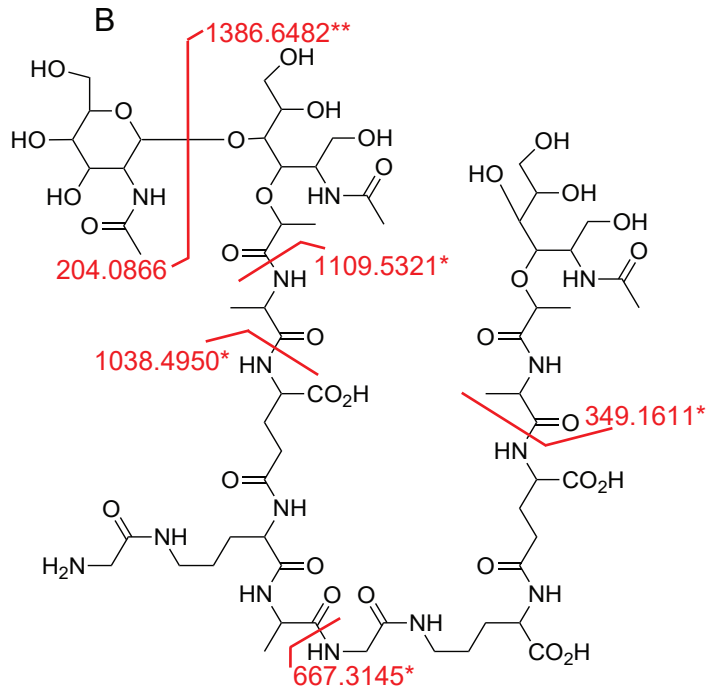

### C

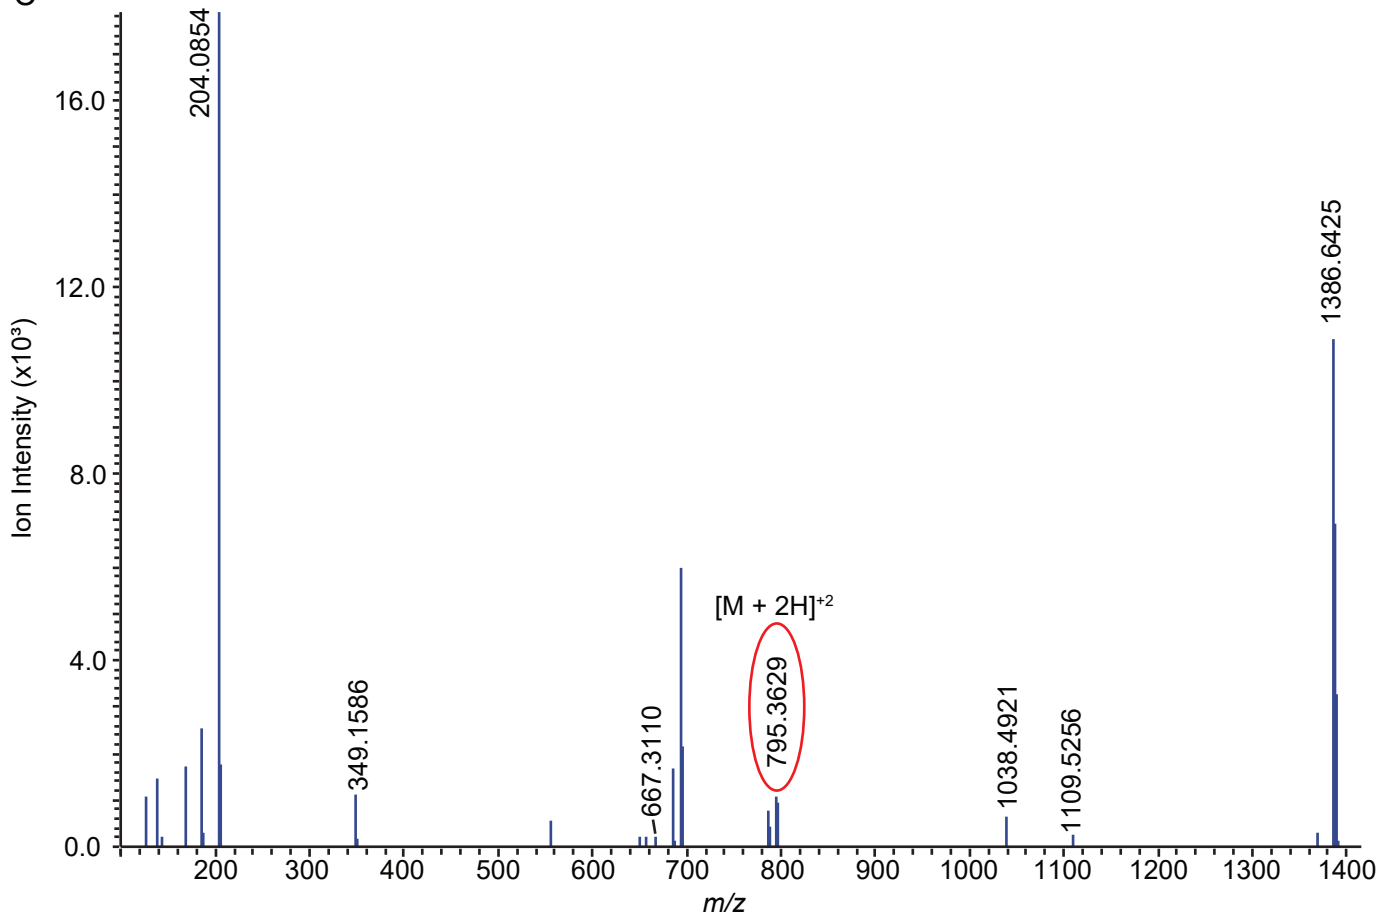

Supplemental Figure 15: (A) MS1 spectra generated from scanning retention times of 13.127-13.427 minutes. (B) The structure of muropeptide 10b. Cleavages with resulting *m/z* fragments are shown in red. (C) MS2 obtained from targeting precursor ion 795.3674  $[M+2H]^{+2}$ . Red fragments generated in B correspond to observed MS2 fragments in C.

# A Muropeptide 11

RT:[13.127-13.427]

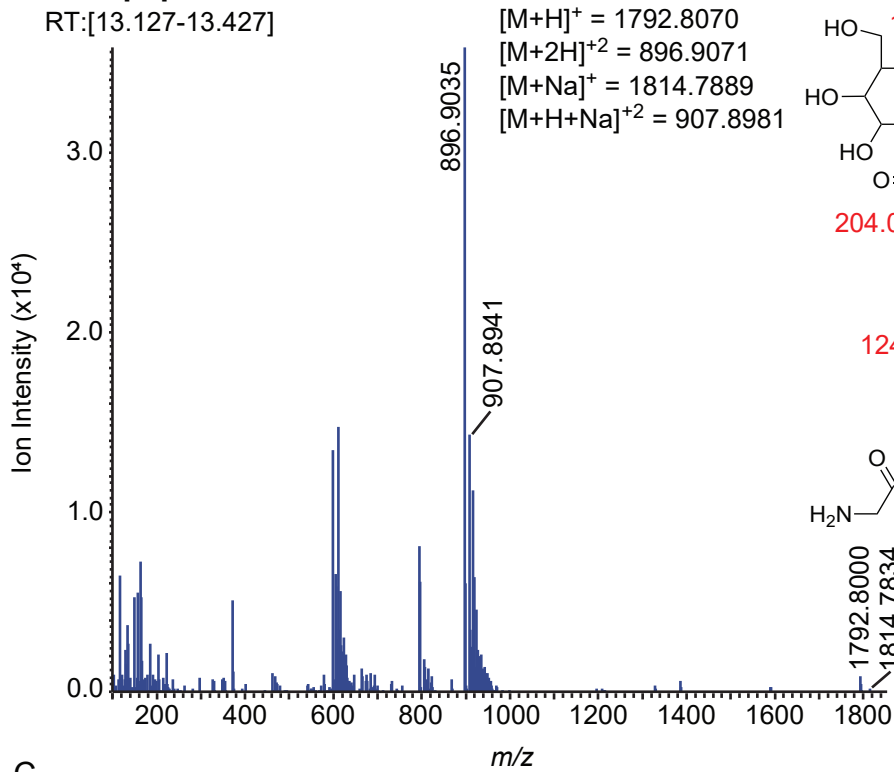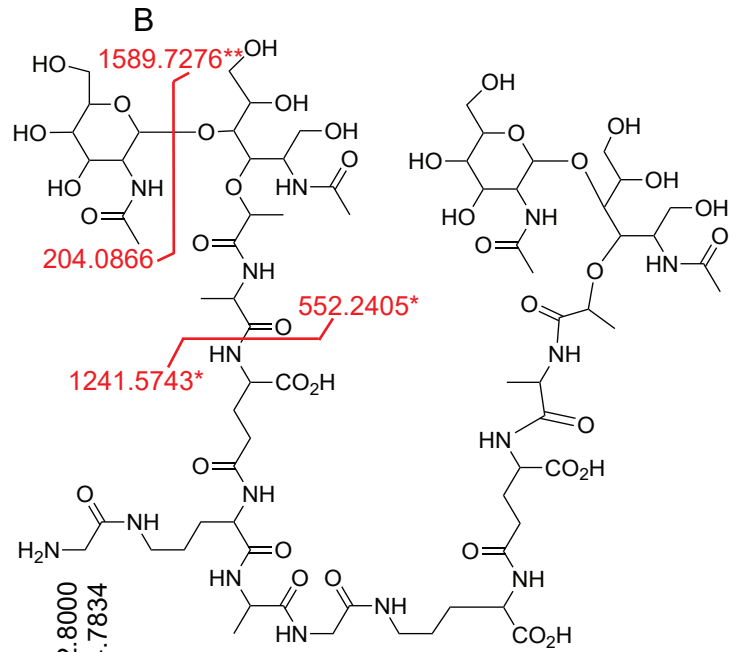

Chemical Formula:  $C_{71}H_{121}N_{15}O_{38}$   
Exact Mass: 1791.7997

\*NaBD<sub>4</sub> reduction increases m/z by 1.006  
\*\*NaBD<sub>4</sub> reduction increases m/z by 2.012

### C

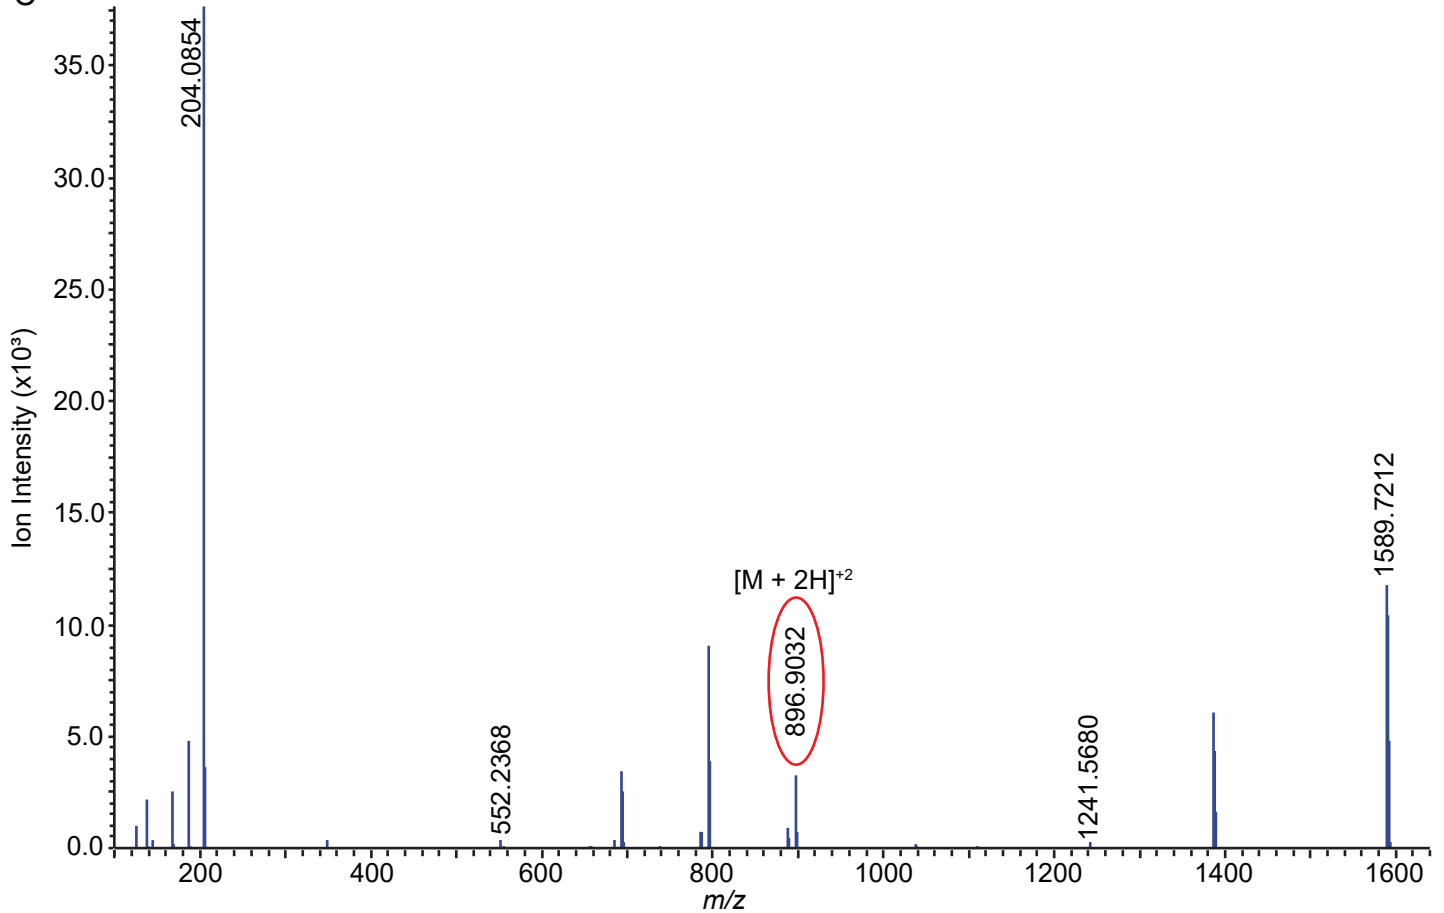

Supplemental Figure 16: (A) MS1 spectra generated from scanning retention times of 13.127-13.427 minutes. (B) The structure of muropeptide 11. Cleavages with resulting  $m/z$  fragments are shown in red. (C) MS2 obtained from targeting precursor ion 896.9035  $[M+H]^{+2}$ . Red fragments generated in B correspond to observed MS2 fragments in C.

### A Muropeptide 8b

RT:[13.677-13.927]

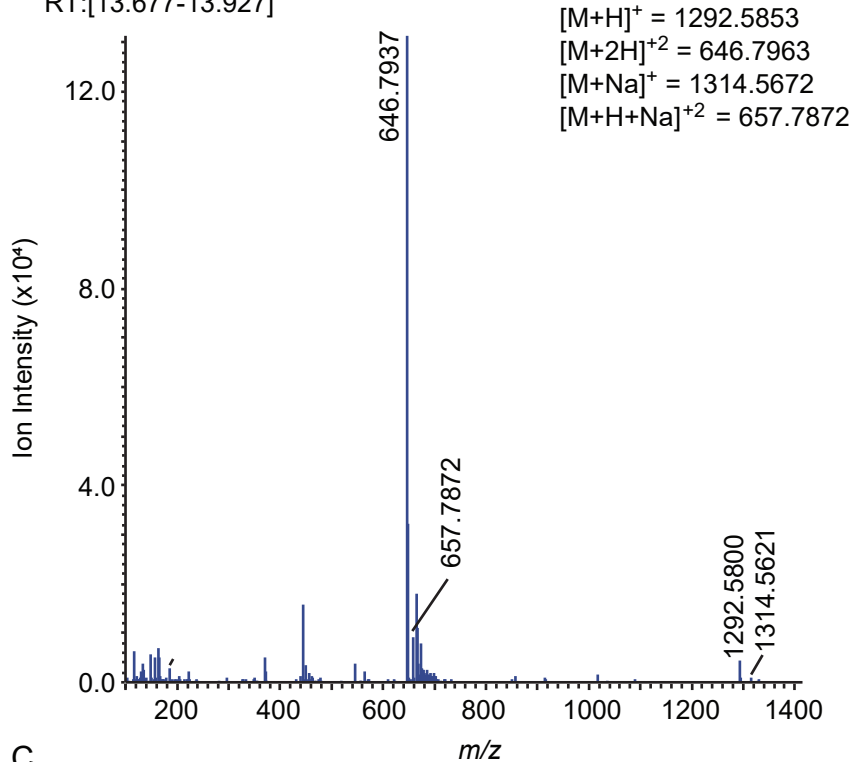

### B

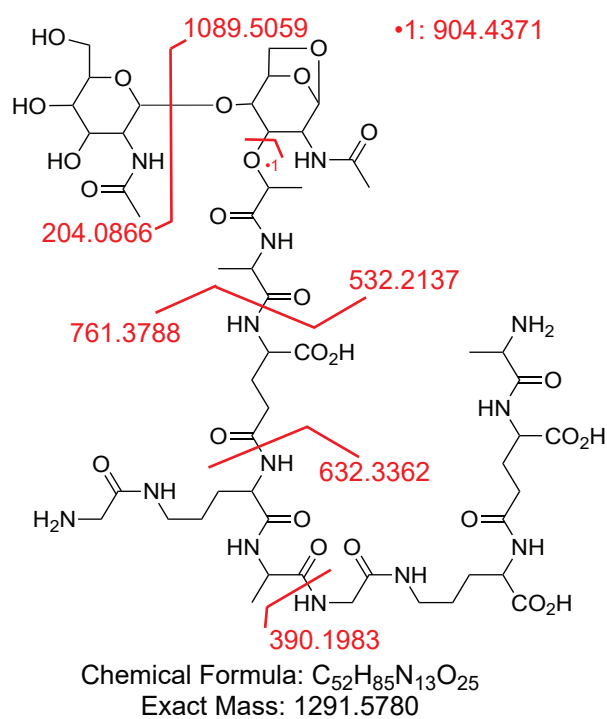

### C

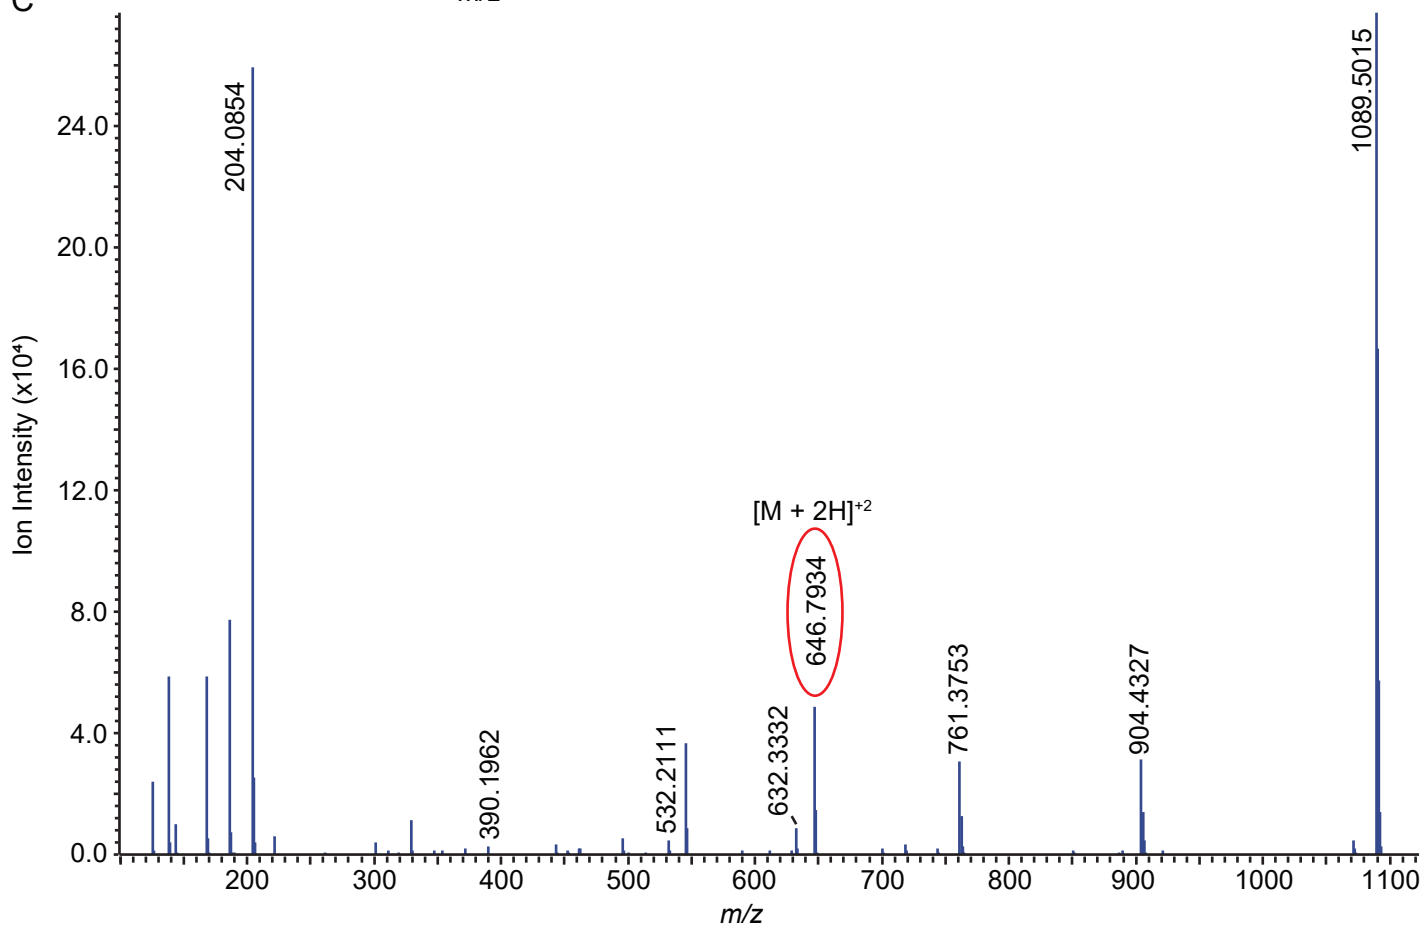

Supplemental Figure 17: (A) MS1 spectra generated from scanning retention times of 13.667-13.927 minutes. (B) The structure of muropeptide 8b. Cleavages with resulting  $m/z$  fragments are shown in red. (C) MS2 obtained from targeting precursor ion 646.7963  $[M+2H]^{+2}$ . Red fragments generated in B correspond to observed MS2 fragments in C.

**A Muropeptide 12a**

RT:[15.262-15.512]

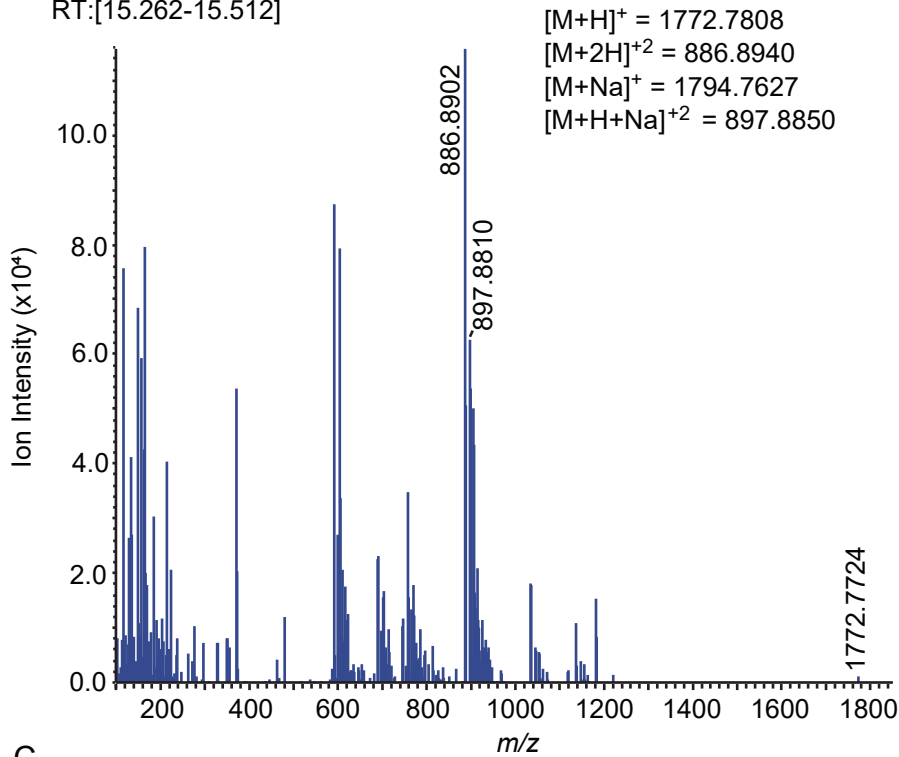**B**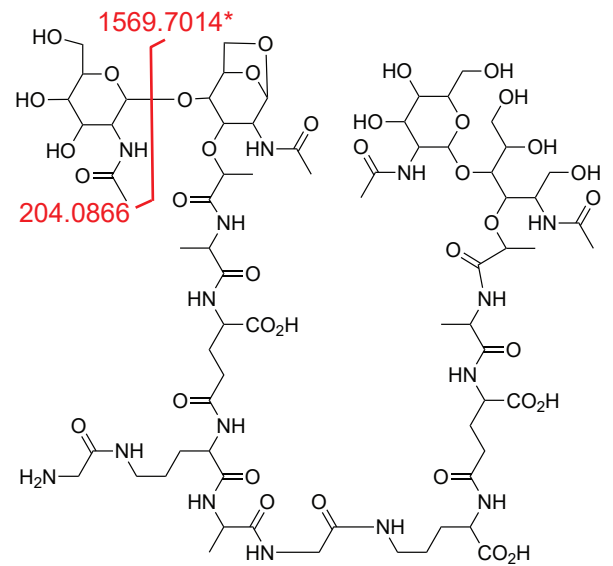Chemical Formula:  $C_{71}H_{117}N_{15}O_{37}$ 

Exact Mass: 1771.7735

\*NaBD<sub>4</sub> reduction increases m/z by 1.006**C**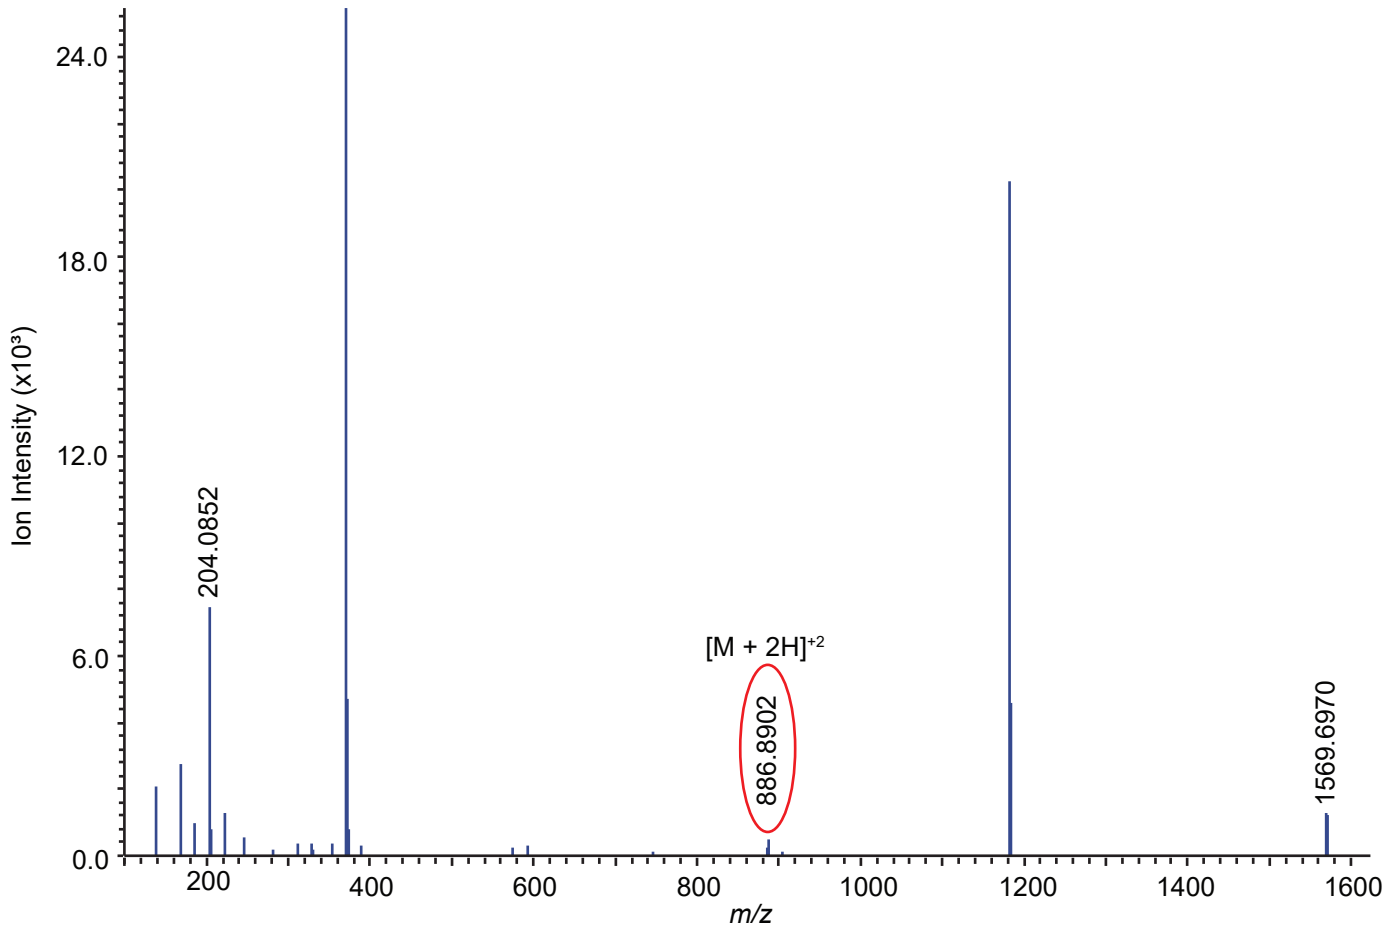

Supplemental Figure 18: (A) MS1 spectra generated from scanning retention times of 15.262-15.512 minutes. (B) The structure of muropeptide 12a. Cleavages with resulting  $m/z$  fragments are shown in red. (C) MS2 obtained from targeting precursor ion 886.8902  $[M+H]^+2$ . Red fragments generated in B correspond to observed MS2 fragments in C.

# A Muuropeptide 13

RT:[15.745-15.862]

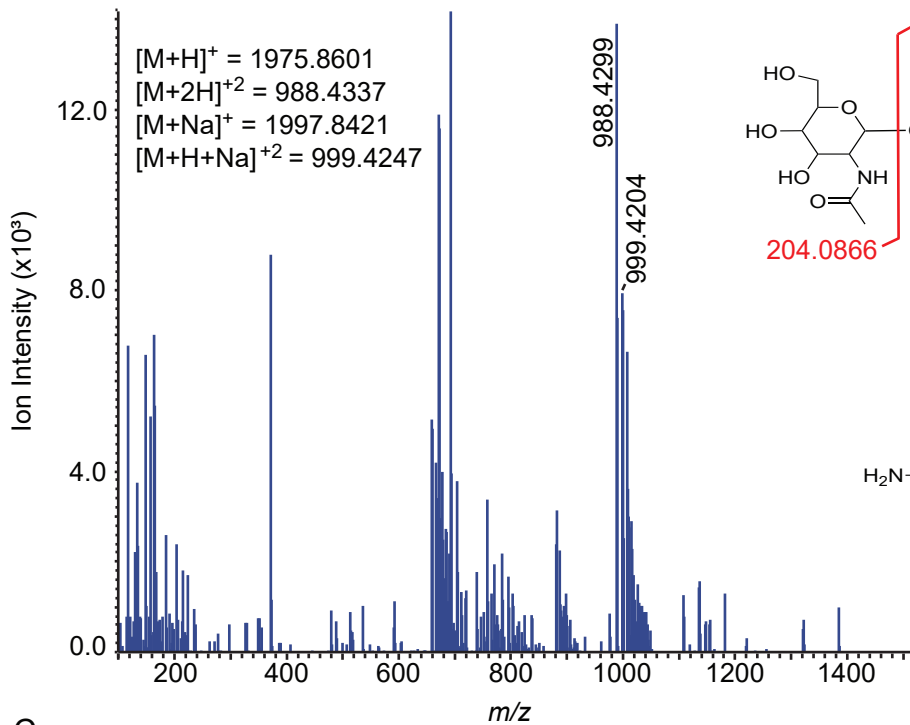

# B

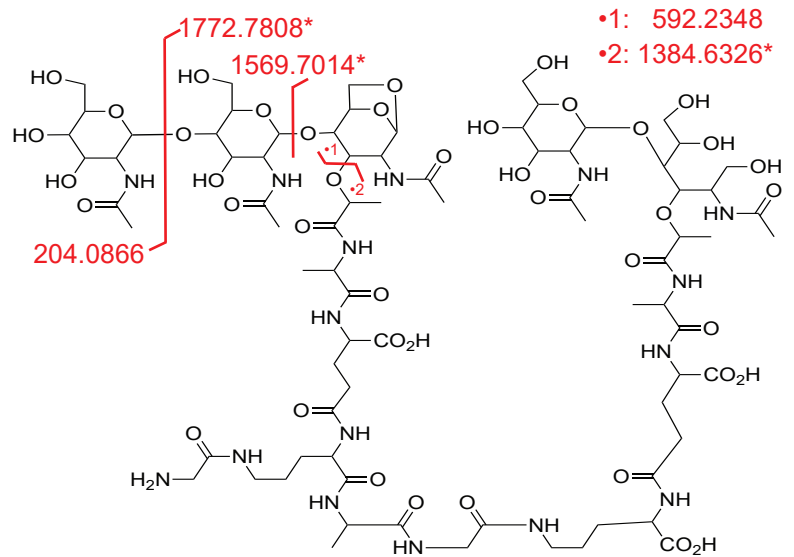

Chemical Formula:  $C_{79}H_{130}N_{16}O_{42}$

Exact Mass: 1974.8529

\*NaBD<sub>4</sub> reduction increases  $m/z$  by 1.006

# C

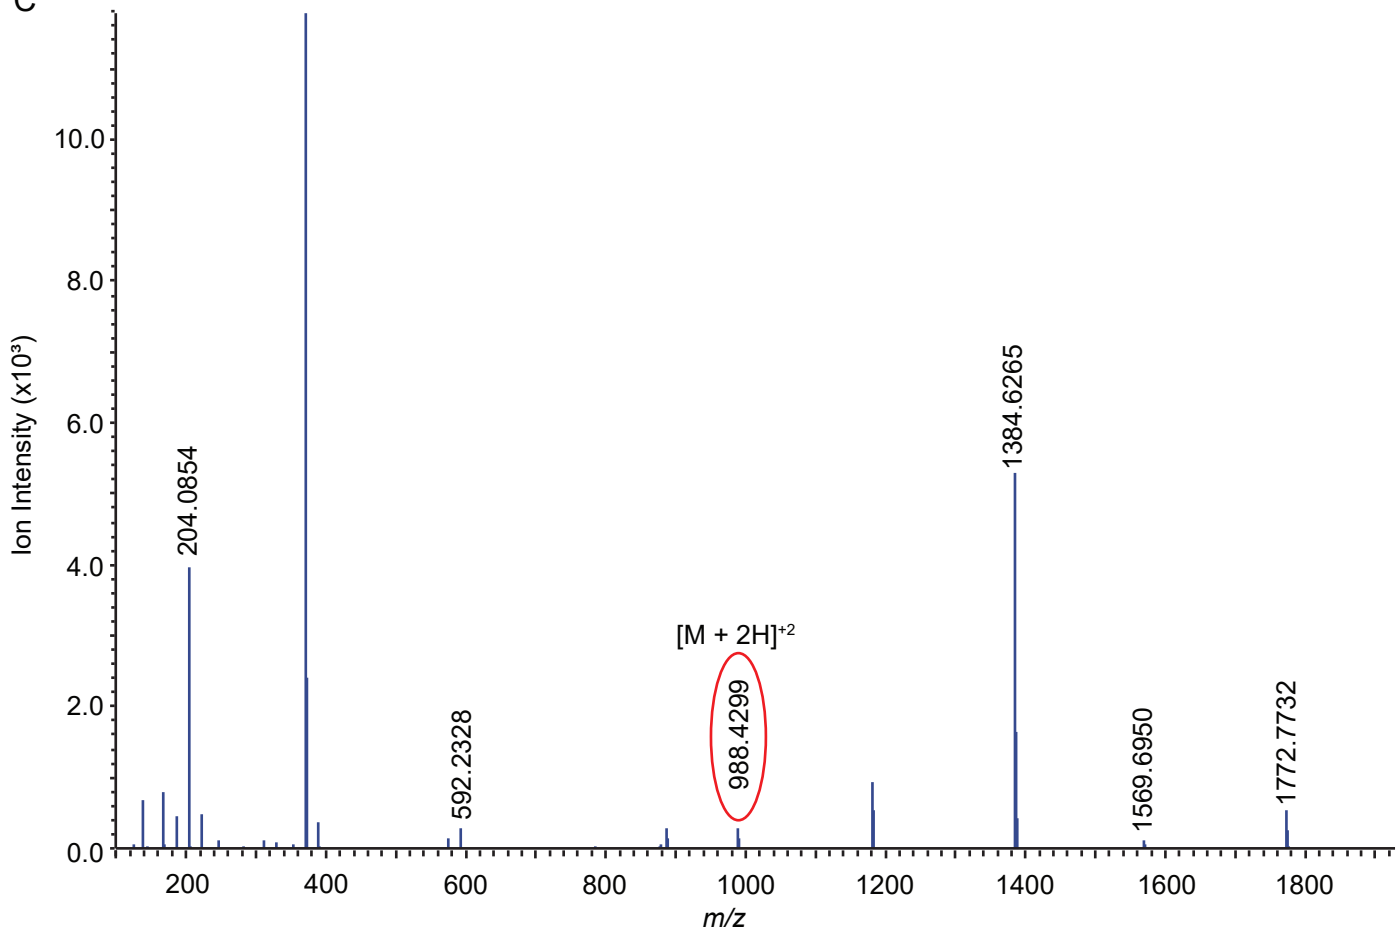

Supplemental Figure 19: (A) MS1 spectra generated from scanning retention times of 15.745-15.862 minutes. (B) The structure of muuropeptide 13. Cleavages with resulting  $m/z$  fragments are shown in red. (C) MS2 obtained from targeting precursor ion 988.4299  $[M+H]^{+2}$ . Red fragments generated in B correspond to observed MS2 fragments in C.

### A Muropeptide 14a

RT:[15.912-16.085]

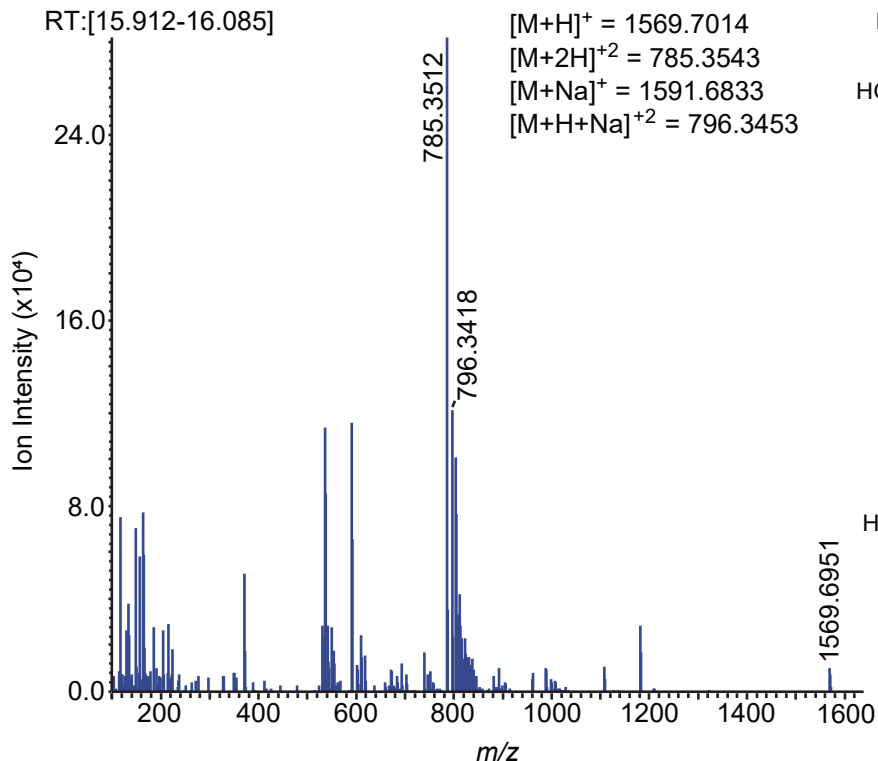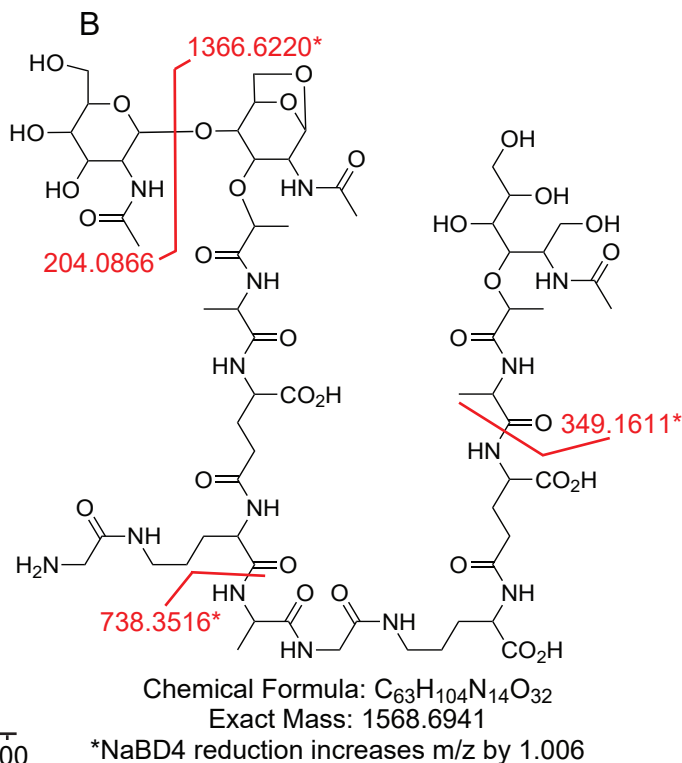

### C

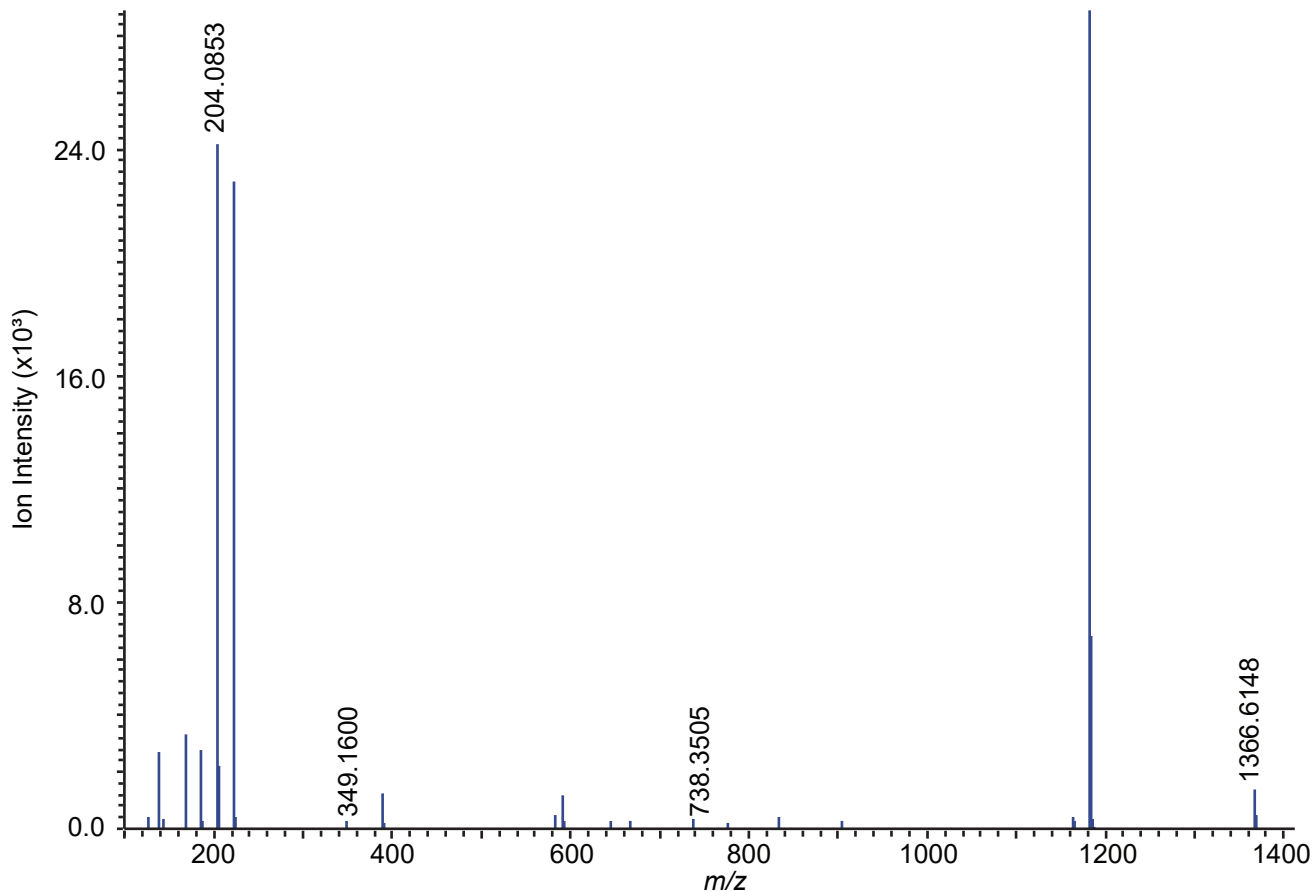

Supplemental Figure 20: (A) MS1 spectra generated from scanning retention times of 15.912-16.085 minutes. (B) The structure of muropeptide 14a. Cleavages with resulting  $m/z$  fragments are shown in red. (C) MS2 obtained from targeting precursor ion 785.3512  $[M+H]^{+2}$ . Red fragments generated in B correspond to observed MS2 fragments in C.



### A Muropeptide 12b

RT:[16.342-16.470]

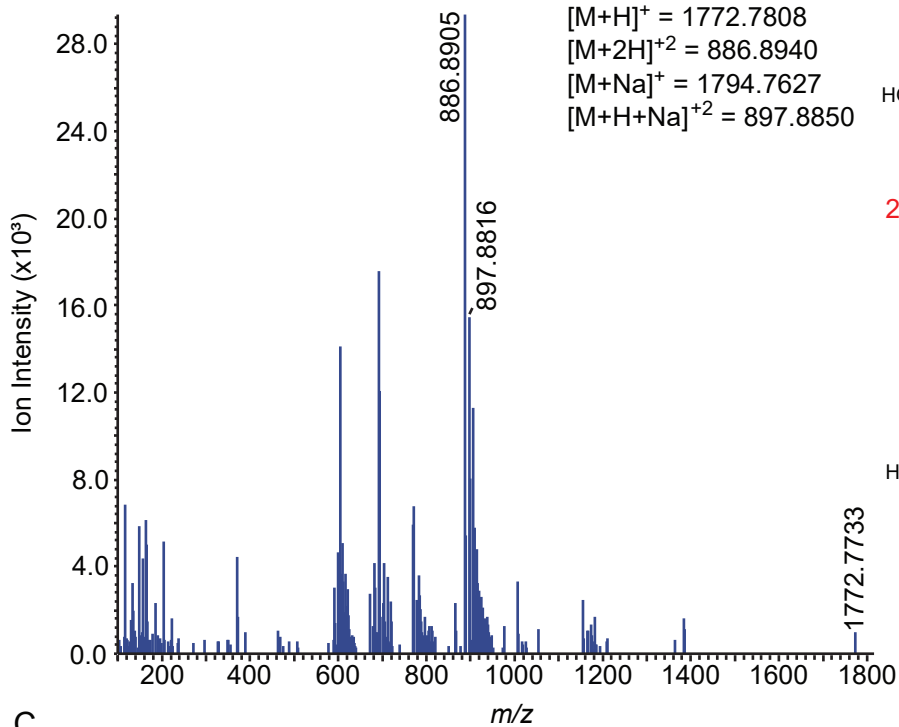

### B

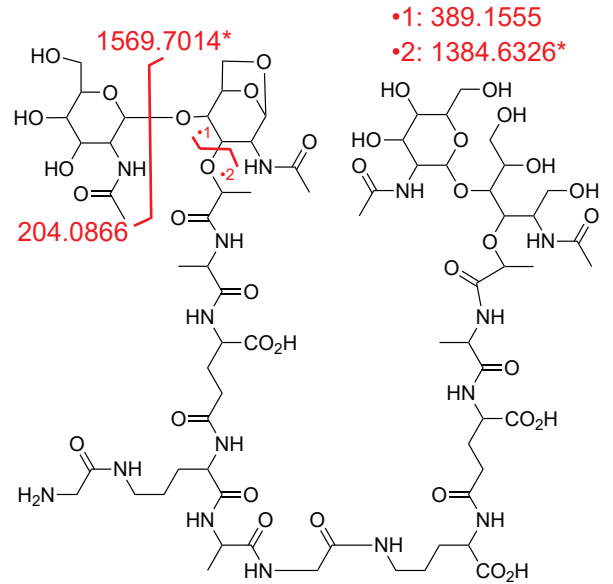

Chemical Formula:  $C_{71}H_{117}N_{15}O_{37}$   
Exact Mass: 1771.7735

\*NaBD<sub>4</sub> reduction increases m/z by 1.006

### C

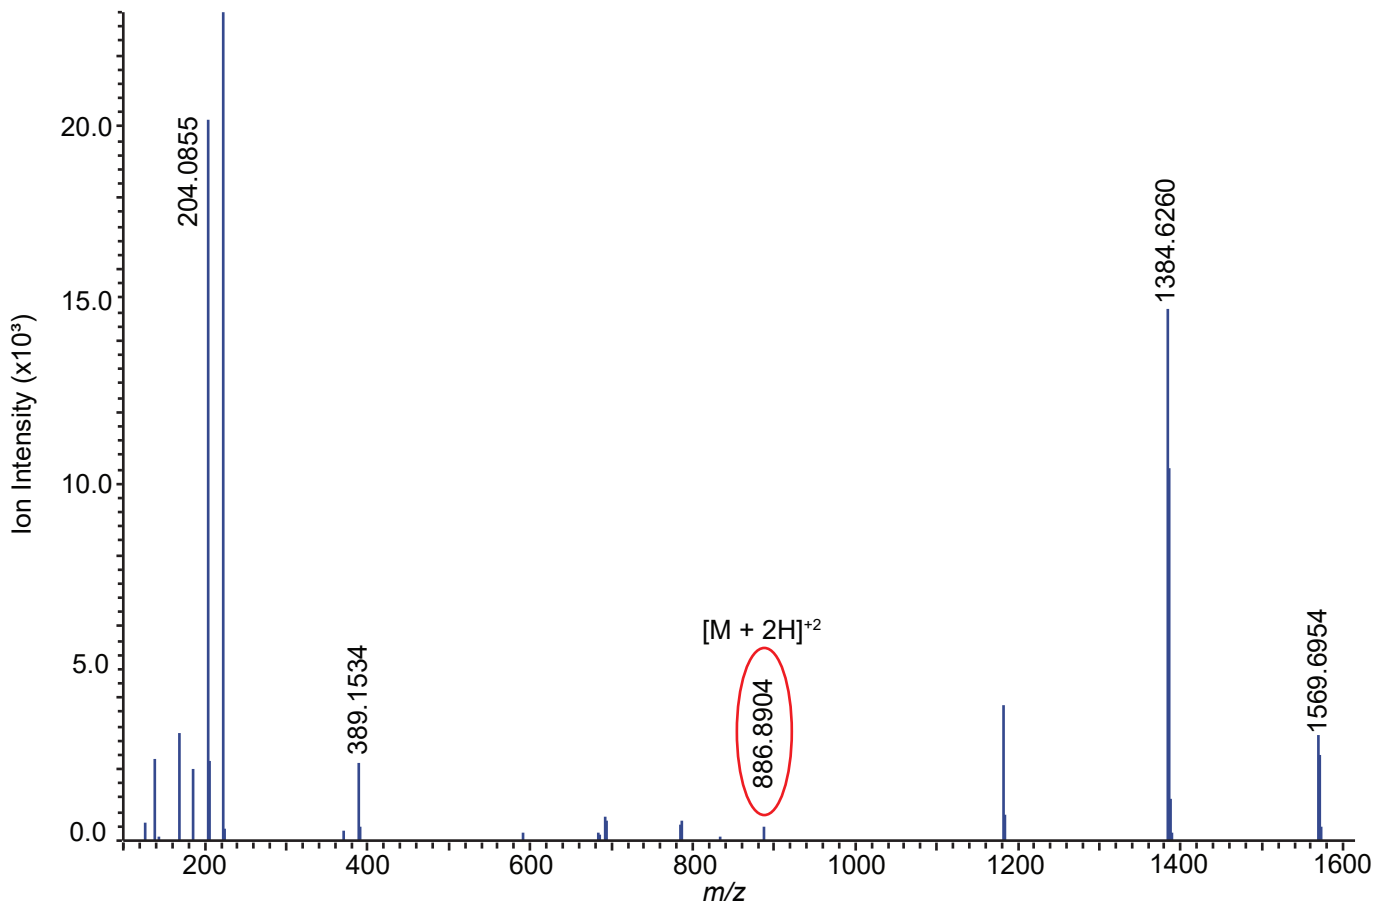

Supplemental Figure 21: (A) MS1 spectra generated from scanning retention times of 16.342-16.470 minutes. (B) The structure of muropeptide 12b. Cleavages with resulting  $m/z$  fragments are shown in red. (C) MS2 obtained from targeting precursor ion 886.8902  $[M+H]^+2$ . Red fragments generated in B correspond to observed MS2 fragments in C.

# A Muropeptide 14b

RT:[17.392-17.522]

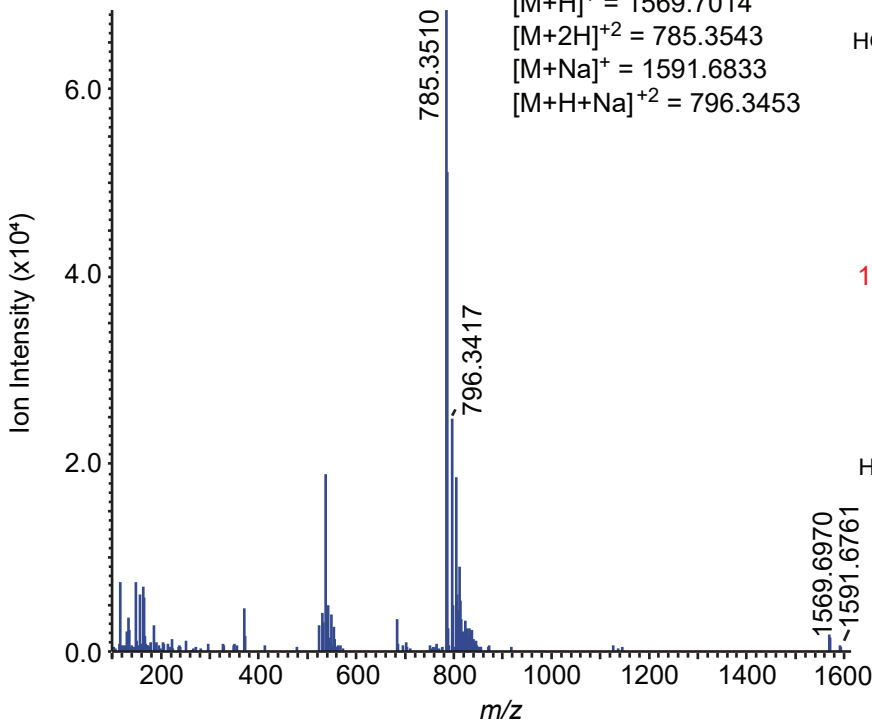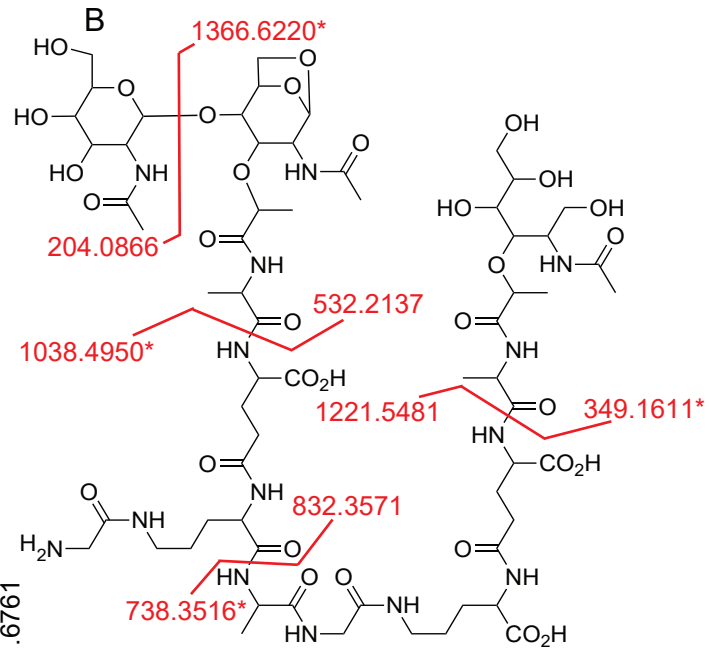

Chemical Formula:  $C_{63}H_{104}N_{14}O_{32}$   
Exact Mass: 1568.6941

\*NaBD4 reduction increases  $m/z$  by 1.006

# C

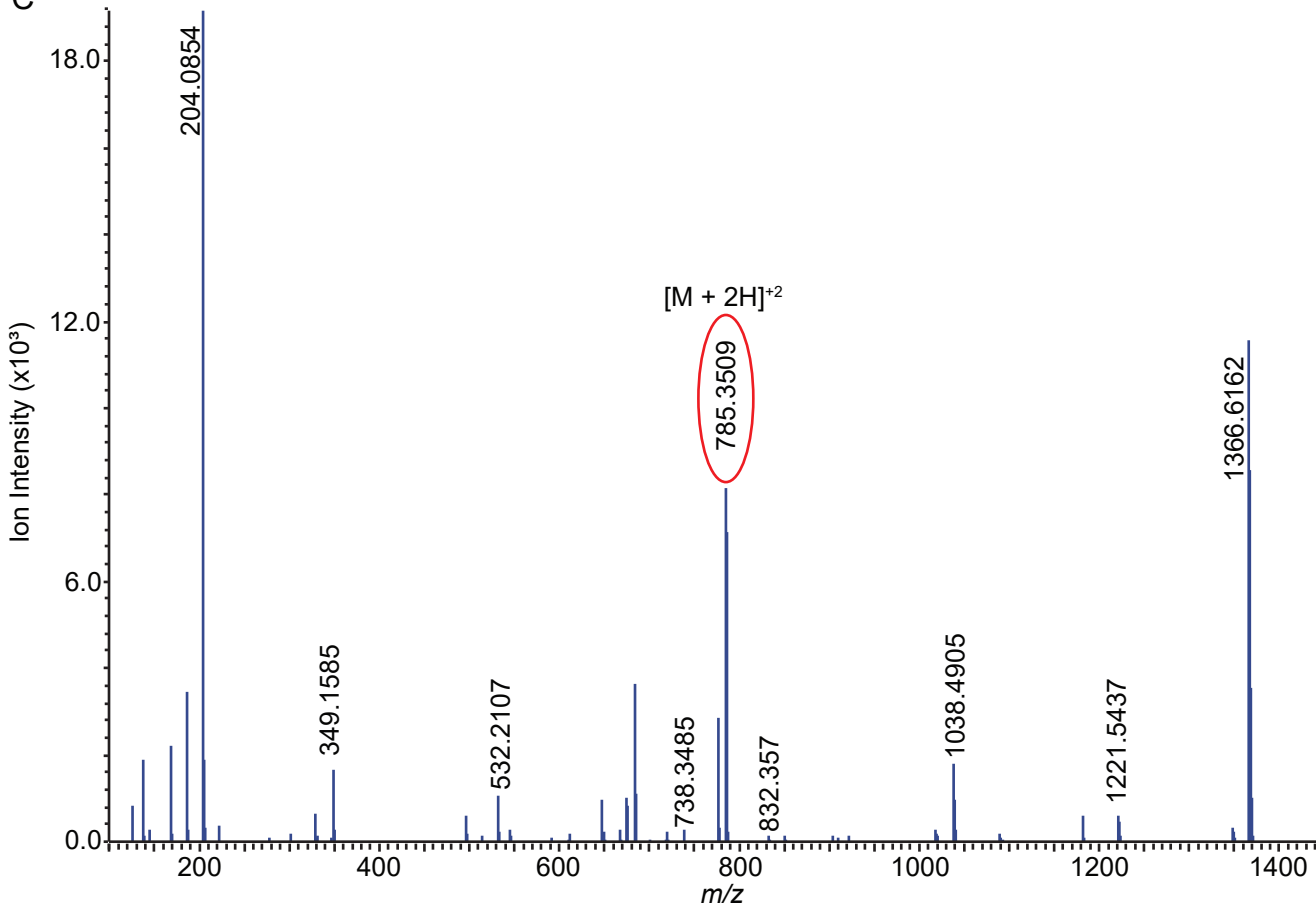

Supplemental Figure 22: (A) MS1 spectra generated from scanning retention times of 17.392-17.522 minutes. (B) The structure of muropeptide 14b. Cleavages with resulting  $m/z$  fragments are shown in red. (C) MS2 obtained from targeting precursor ion 785.3512  $[M+H]^{+2}$ . Red fragments generated in B correspond to observed MS2 fragments in C.

### A Muuropeptide 14c

RT:[17.717-17.890]

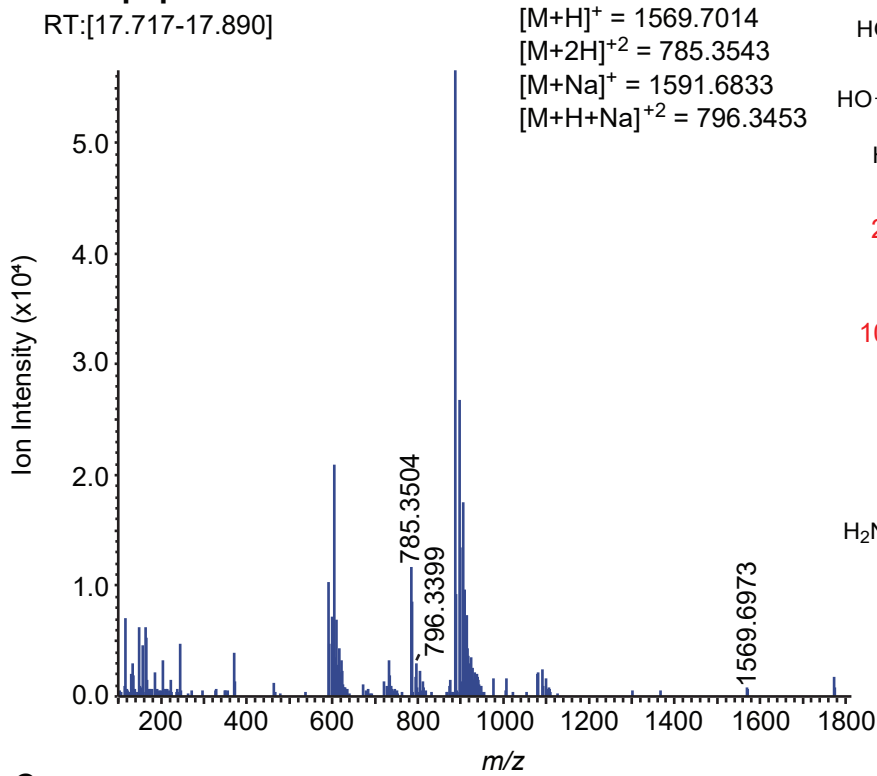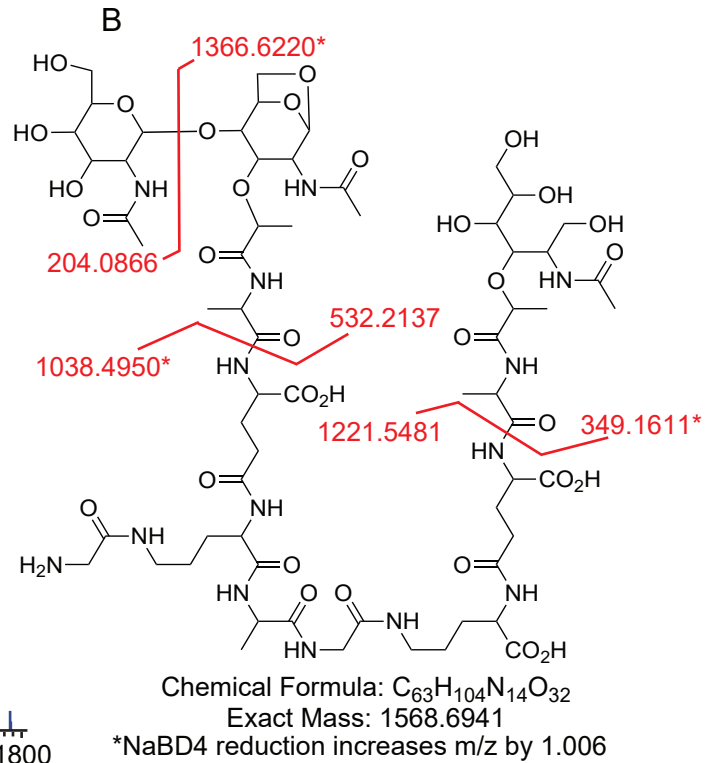

### C

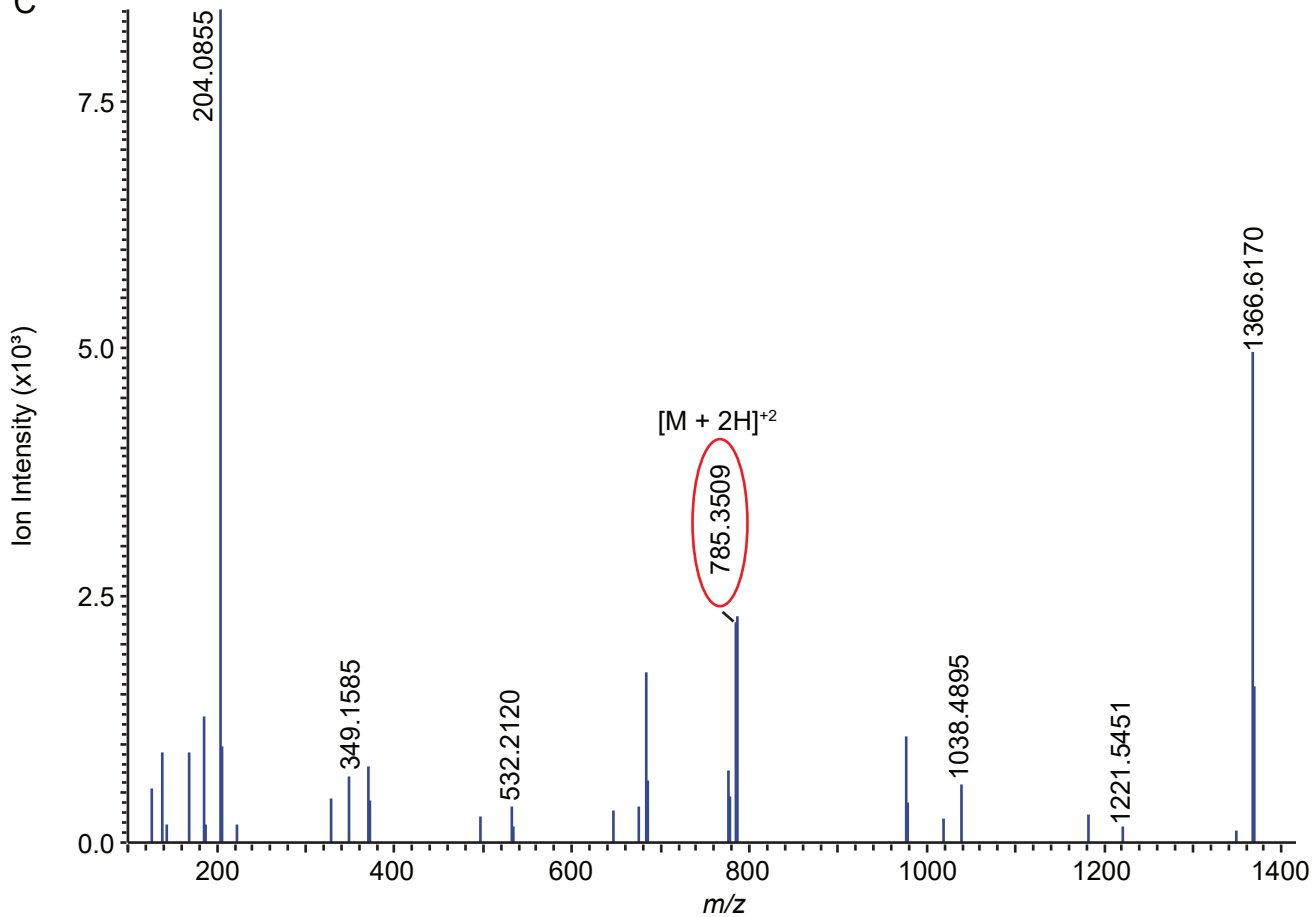

Supplemental Figure 23: (A) MS1 spectra generated from scanning retention times of 17.717-17.890 minutes. (B) The structure of muuropeptide 14c. Cleavages with resulting  $m/z$  fragments are shown in red. (C) MS2 obtained from targeting precursor ion 785.3512  $[M+H]^{+2}$ . Red fragments generated in B correspond to observed MS2 fragments in C.

**A Muropeptide 12c**

RT:[17.717-17.890]

 $[M+H]^+ = 1772.7808$   
 $[M+2H]^{+2} = 886.8940$   
 $[M+Na]^+ = 1794.7627$   
 $[M+H+Na]^{+2} = 897.8850$ 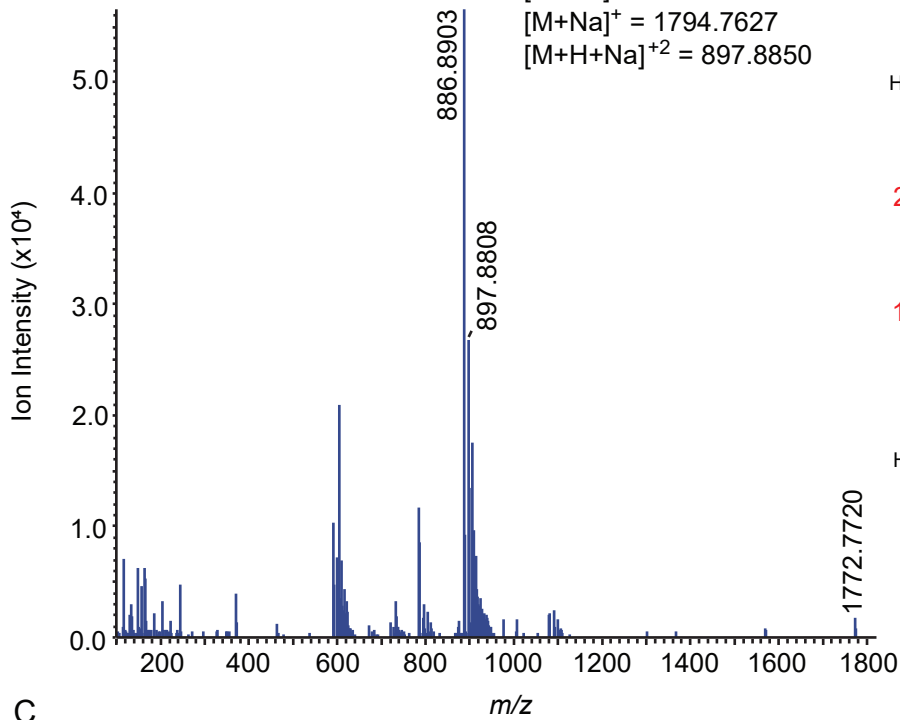**B**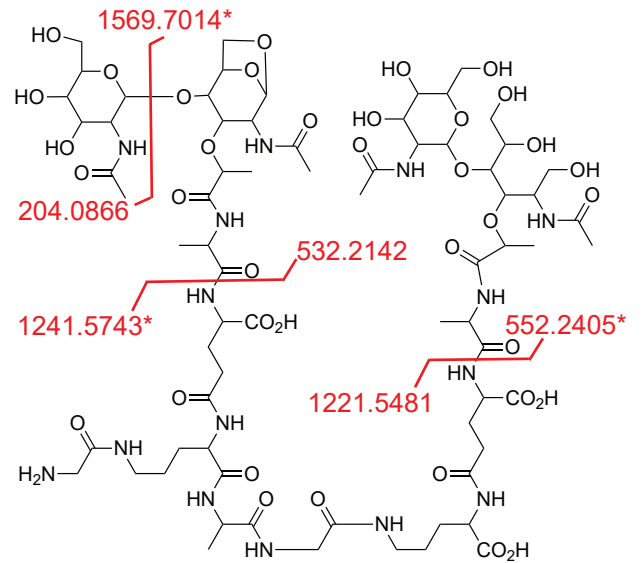Chemical Formula:  $C_{71}H_{117}N_{15}O_{37}$   
Exact Mass: 1771.7735\*NaBD<sub>4</sub> reduction increases  $m/z$  by 1.006**C**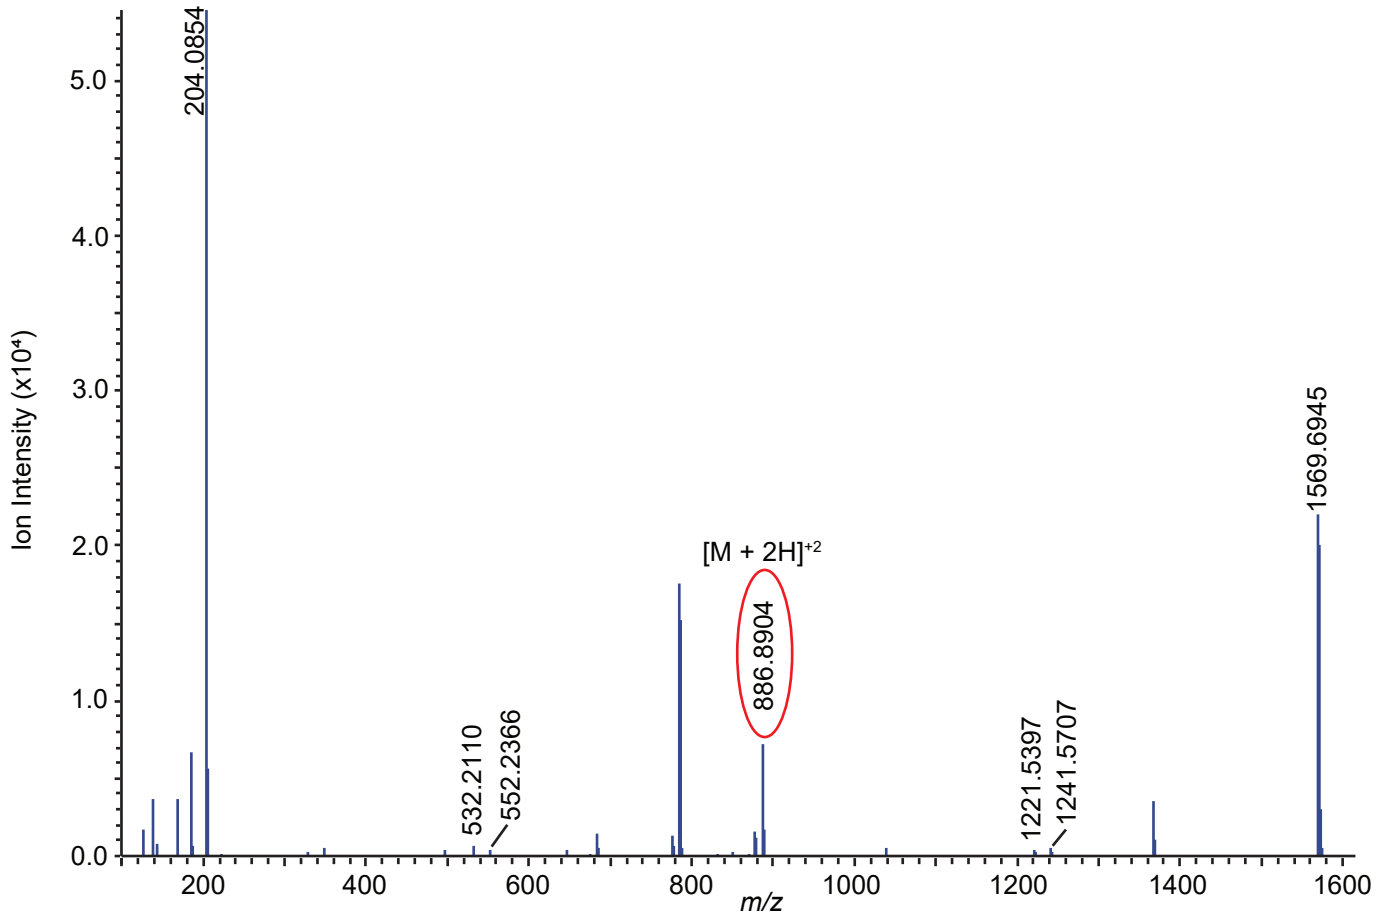

Supplemental Figure 24: (A) MS1 spectra generated from scanning retention times of 17.717-17.890 minutes. (B) The structure of muropeptide 12c. Cleavages with resulting  $m/z$  fragments are shown in red. (C) MS2 obtained from targeting precursor ion 886.8902  $[M+H]^{+2}$ . Red fragments generated in B correspond to observed MS2 fragments in C.

# A Muropeptide 15a

RT:[18.370-18.570]

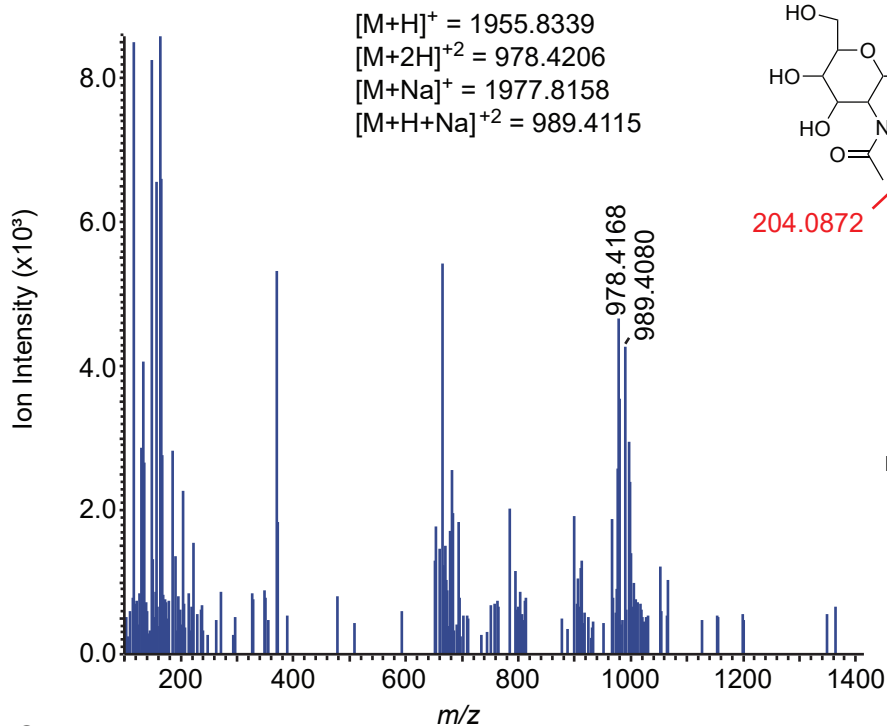

# B

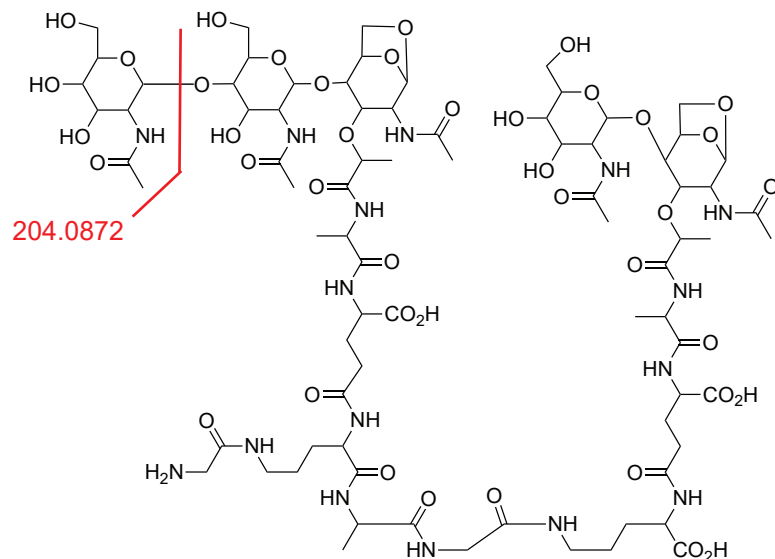

Chemical Formula:  $C_{79}H_{126}N_{16}O_{41}$   
Exact Mass: 1954.8266  
\*NaBD<sub>4</sub> reduction increases  $m/z$  by 1.006

# C

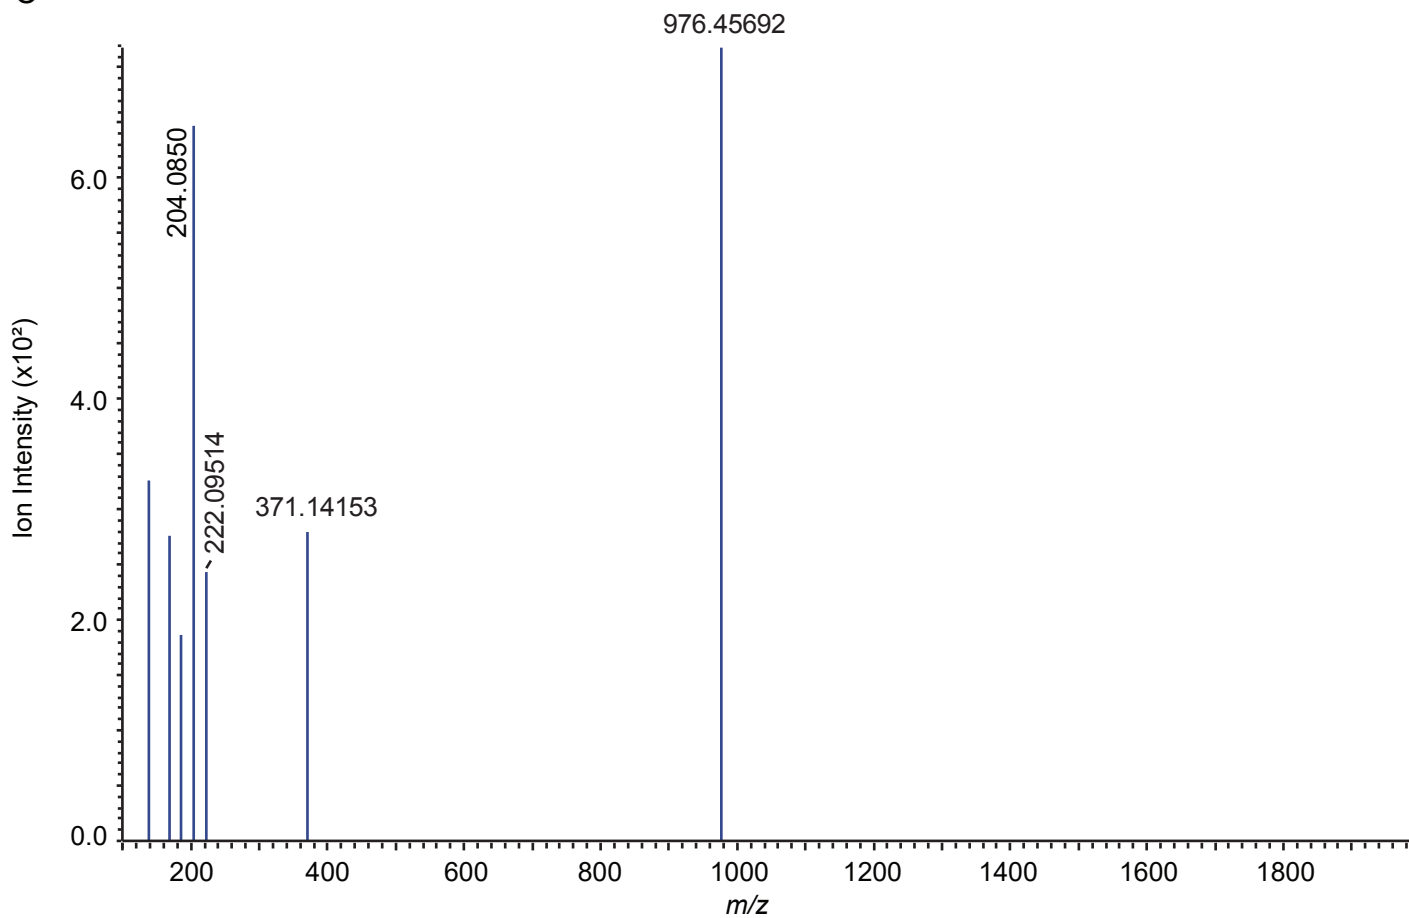

Supplemental Figure 25: (A) MS1 spectra generated from scanning retention times of 18.370-18.570 minutes. (B) The structure of muropeptide 15a. Cleavages with resulting  $m/z$  fragments are shown in red. (C) MS2 obtained from targeting precursor ion 978.417 [M+H]<sup>2+</sup>. Red fragments generated in B correspond to observed MS2 fragments in C.

# A Muropeptide 16a

RT:[18.917-19.130]

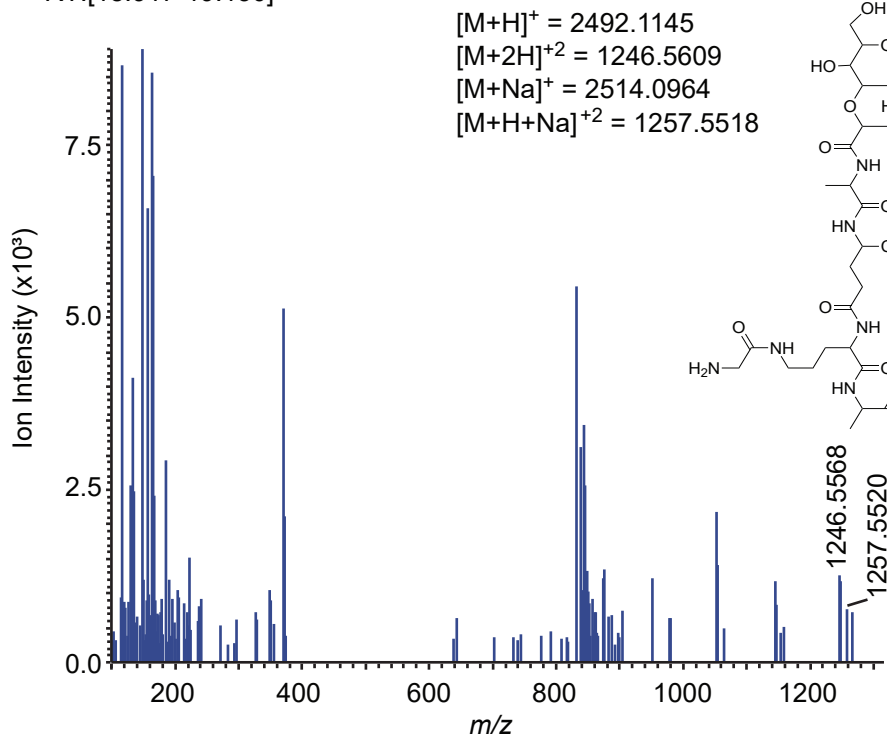

# B

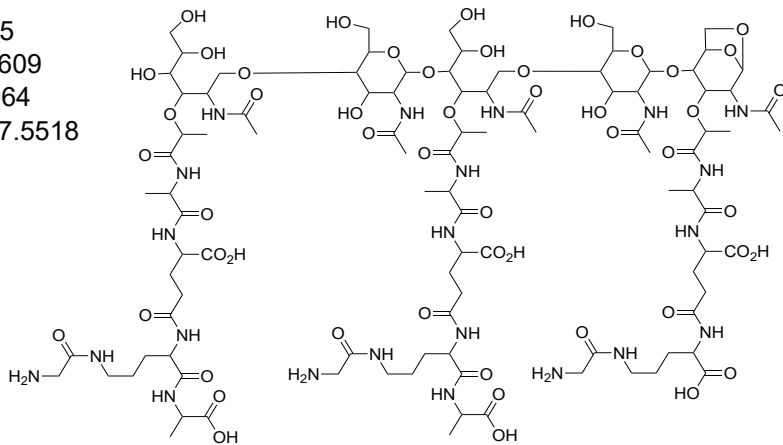

Chemical Formula:  $C_{100}H_{166}N_{22}O_{51}$   
Exact Mass: 2491.1072  
\*NaBD<sub>4</sub> reduction increases m/z by 1.006

# C

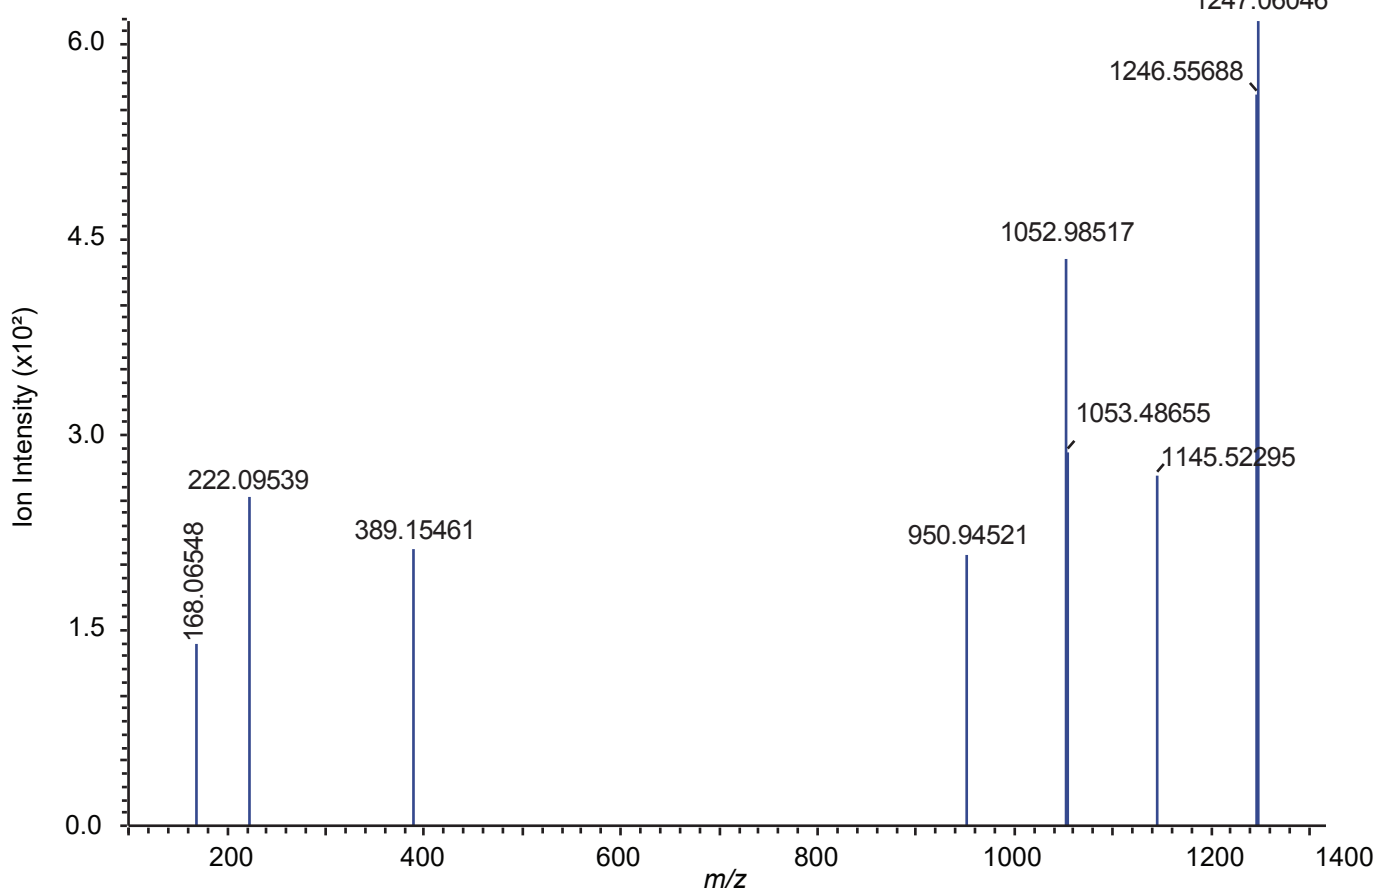

Supplemental Figure 26: (A) MS1 spectra generated from scanning retention times of 18.917-19.130 minutes. (B) The structure of muropeptide 16a. (C) MS2 obtained from targeting precursor ion 1246.5609  $[M+H]^{+2}$ .

### A Muropeptide 17a

RT:[19.197-19.330]

$[M+H]^+ = 1752.7546$   
 $[M+2H]^{+2} = 876.8809$   
 $[M+Na]^+ = 1774.7365$   
 $[M+H+Na] = 887.8719^{+2}$

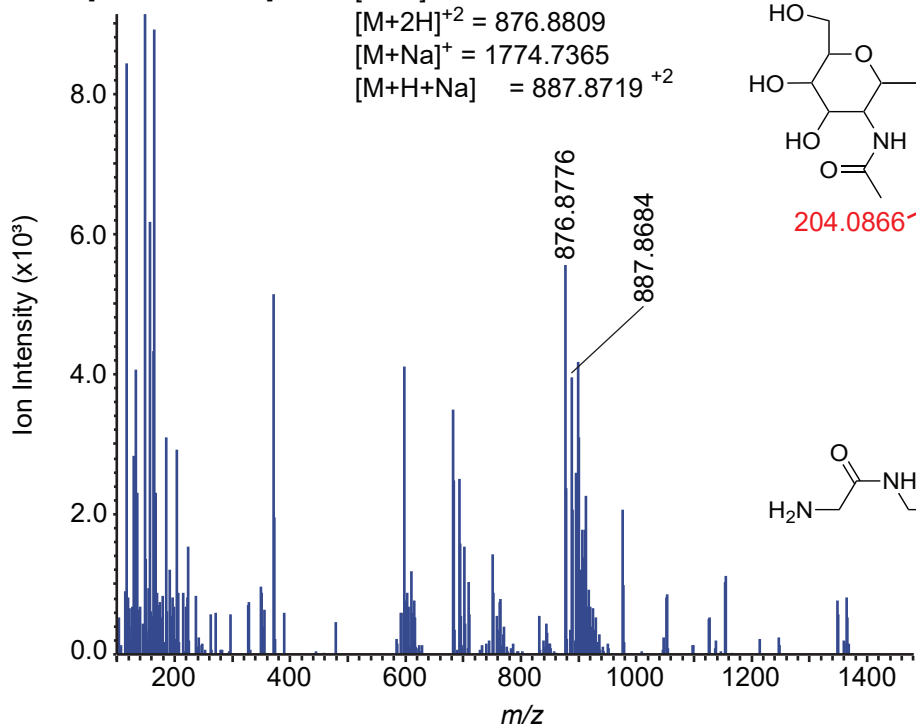

### B

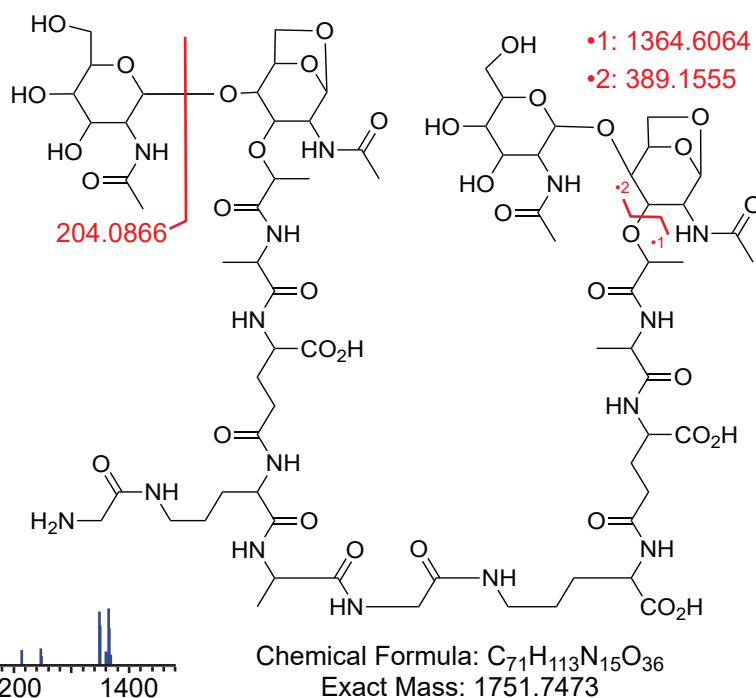

### C

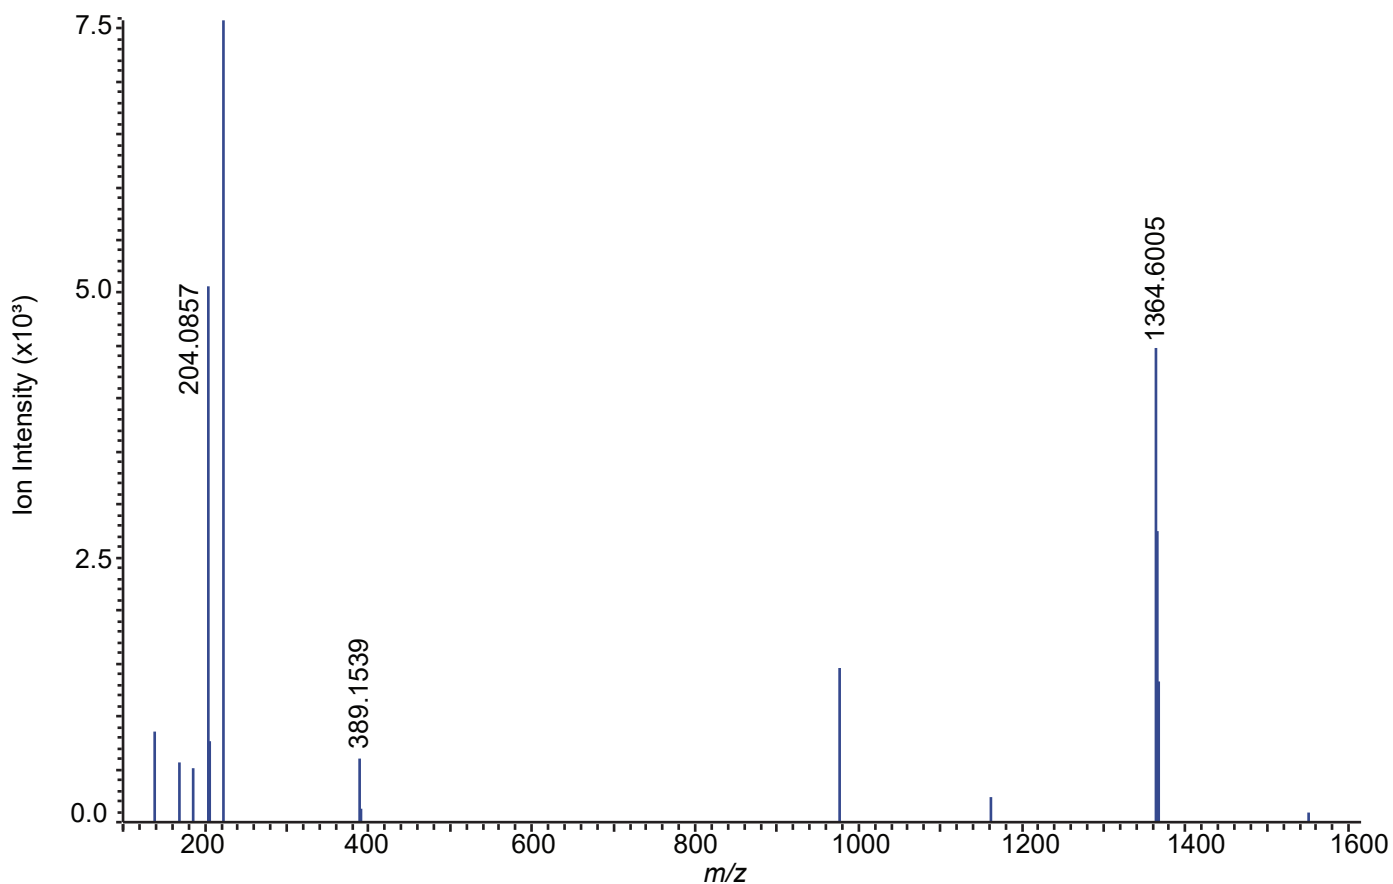

Supplemental Figure 27: (A) MS1 spectra generated from scanning retention times of 19.197-19.330 minutes. (B) The structure of muropeptide 17a. Cleavages with resulting  $m/z$  fragments are shown in red. (C) MS2 obtained from targeting precursor ion 876.8775  $[M+H]^{+2}$ . Red fragments generated in B correspond to observed MS2 fragments in C.

## A Muropeptide 15b

RT:[19.650-19.877]

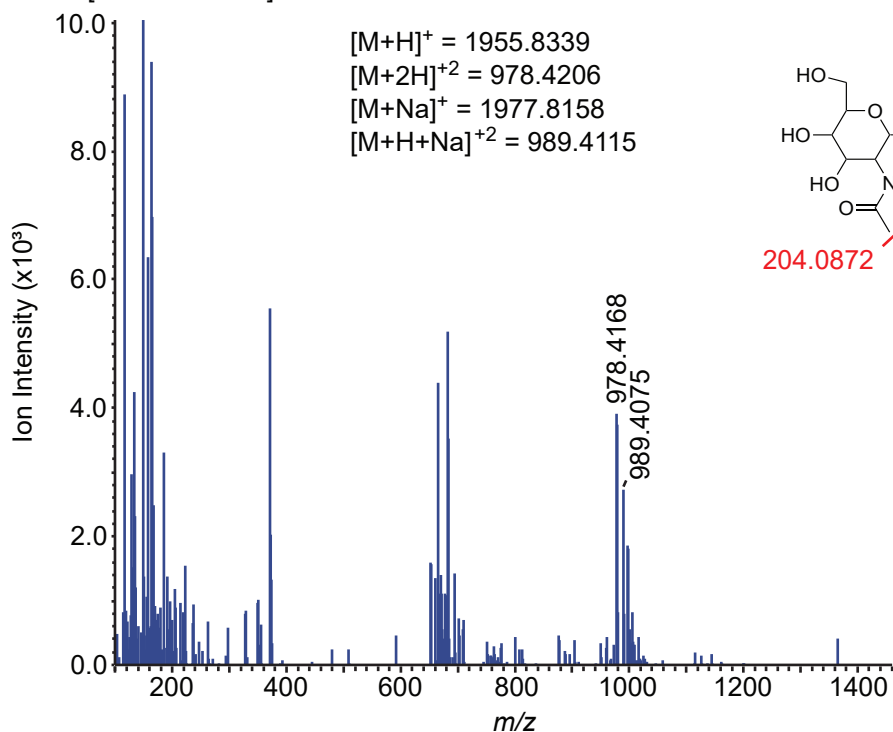

## B

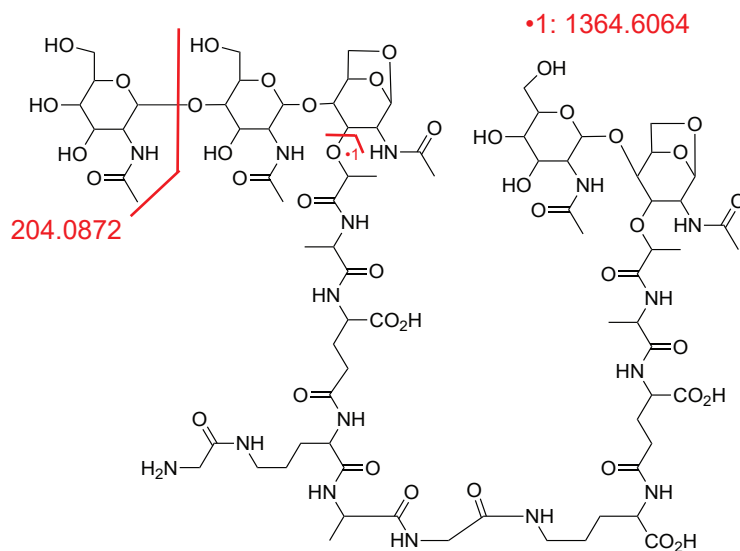

Chemical Formula: C<sub>79</sub>H<sub>126</sub>N<sub>16</sub>O<sub>41</sub>

Exact Mass: 1954.8266

\*NaBD<sub>4</sub> reduction increases m/z by 1.006

## C

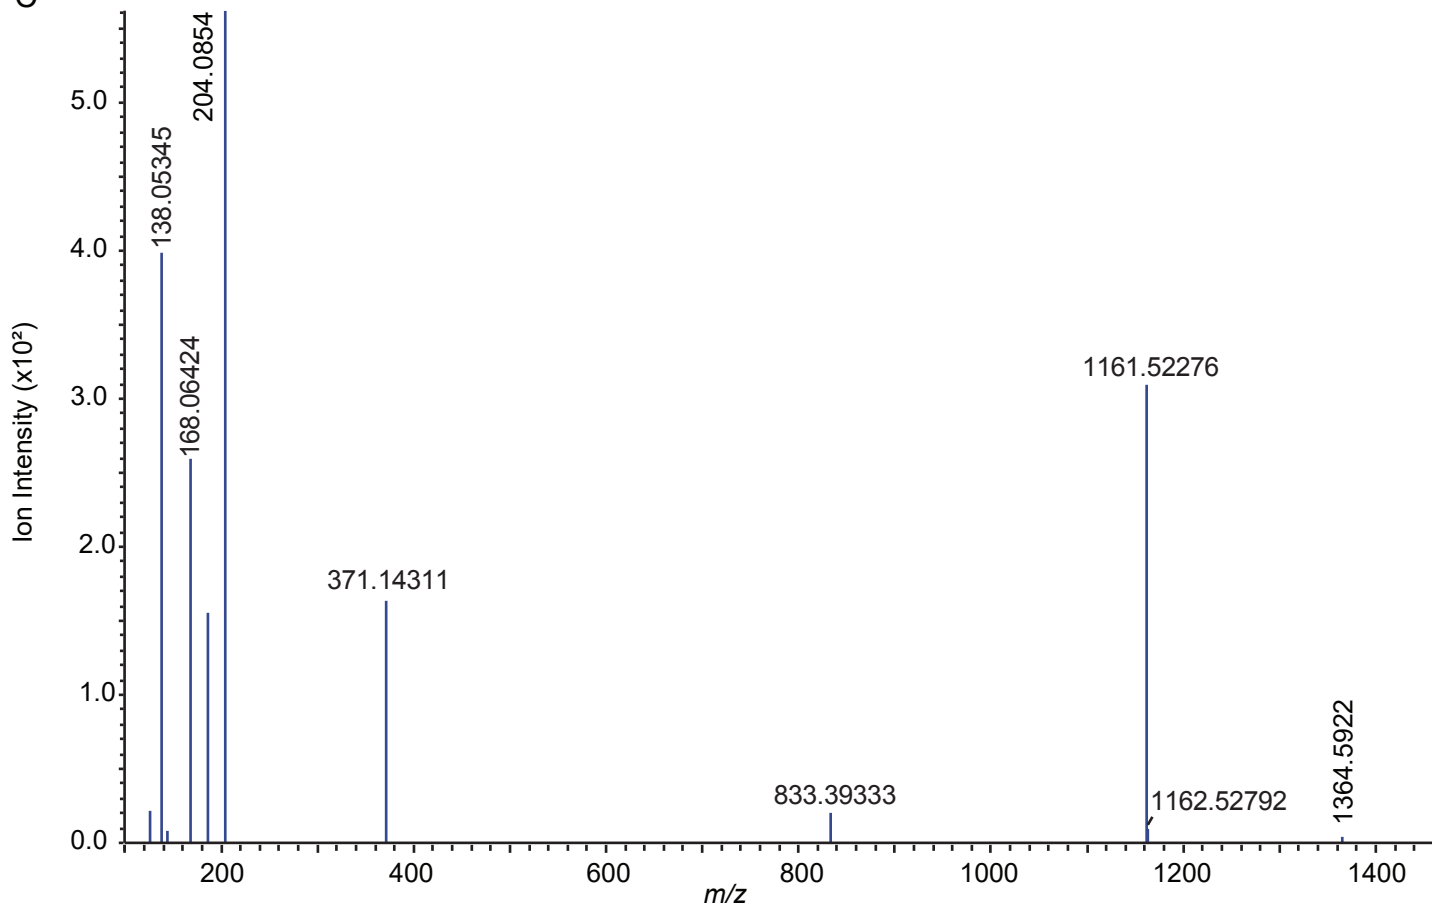

Supplemental Figure 28: (A) MS1 spectra generated from scanning retention times of 19.650-19.877 minutes. (B) The structure of muropeptide 15b. Cleavages with resulting *m/z* fragments are shown in red. (C) MS2 obtained from targeting precursor ion 978.4168 [M+H]<sup>+</sup>2. Red fragments generated in B correspond to observed MS2 fragments in C.



# A Muropeptide 16b

RT:[20.215-20.590]

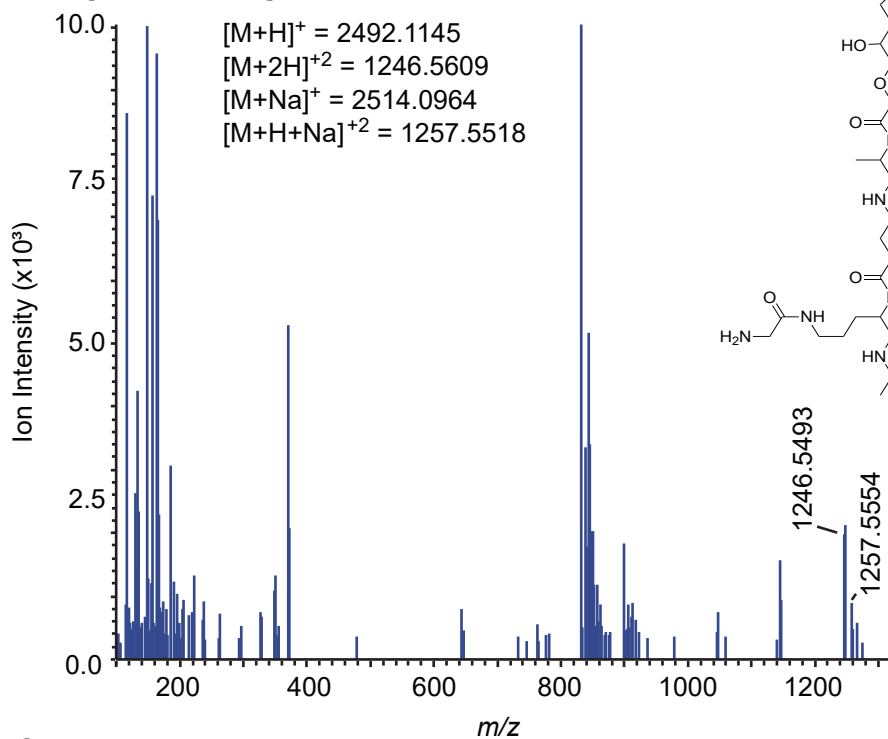

# B

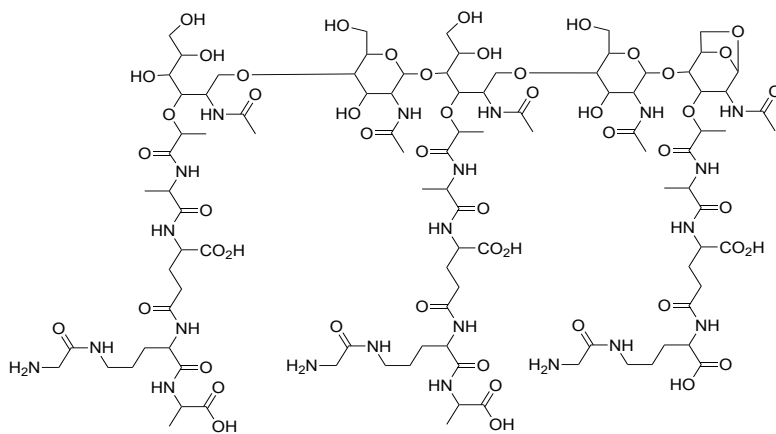

Chemical Formula: C<sub>100</sub>H<sub>166</sub>N<sub>22</sub>O<sub>51</sub>  
Exact Mass: 2491.1072  
\*NaBD<sub>4</sub> reduction increases m/z by 1.006

# C

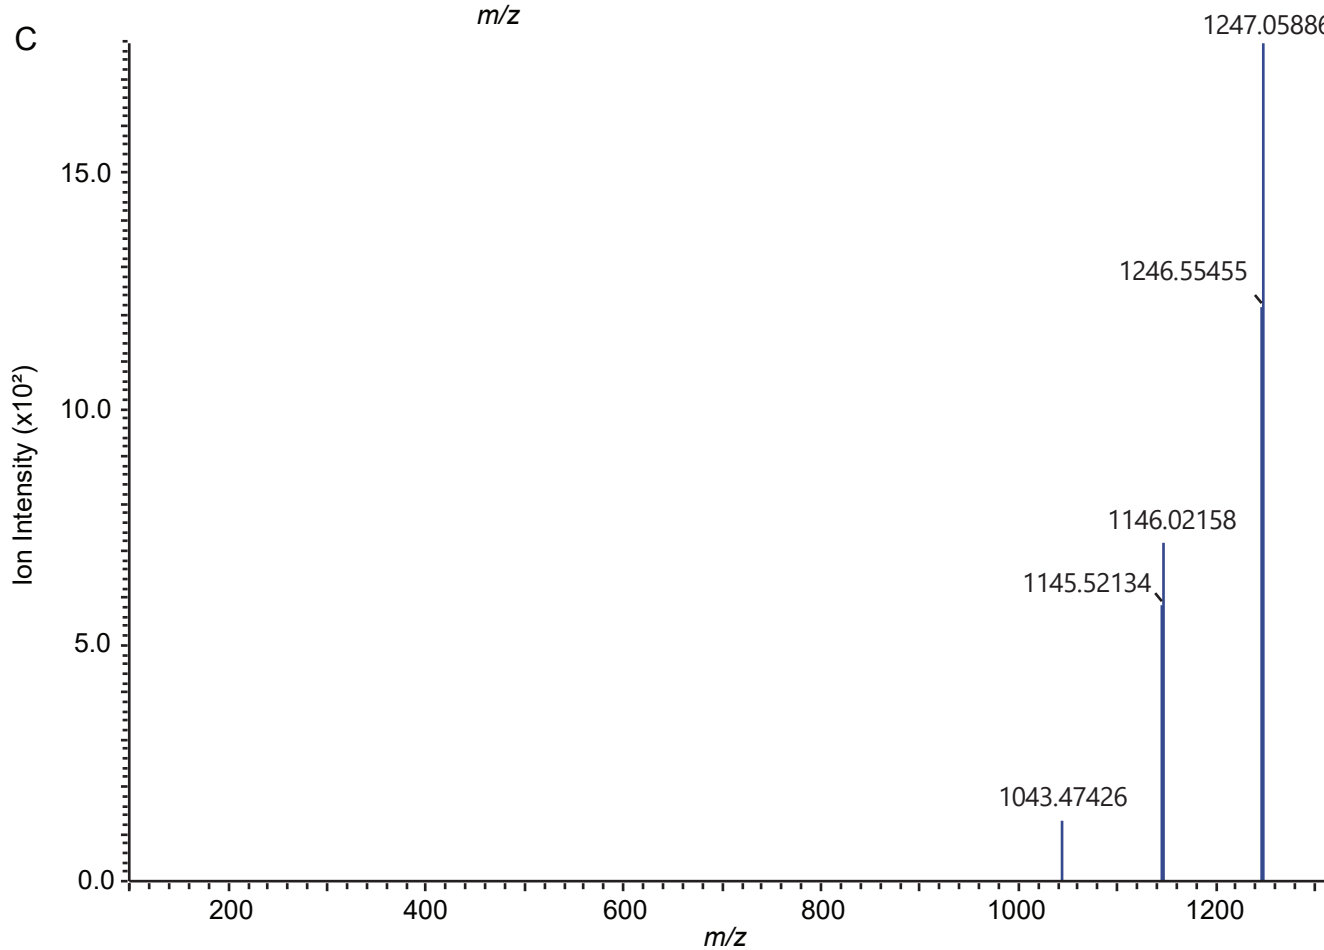

Supplemental Figure 29: (A) MS1 spectra generated from scanning retention times of 20.215-20.590 minutes. (B) The structure of muropeptide 16b. (C) MS2 obtained from targeting precursor ion 1246.5609 [M+H]<sup>+</sup>2.

### A Muropeptide 17b

RT:[20.457-20.590]

$[M+H]^+ = 1752.7546$   
 $[M+2H]^{+2} = 876.8809$   
 $[M+Na]^+ = 1774.7365$   
 $[M+H+Na]^{+2} = 887.8719$

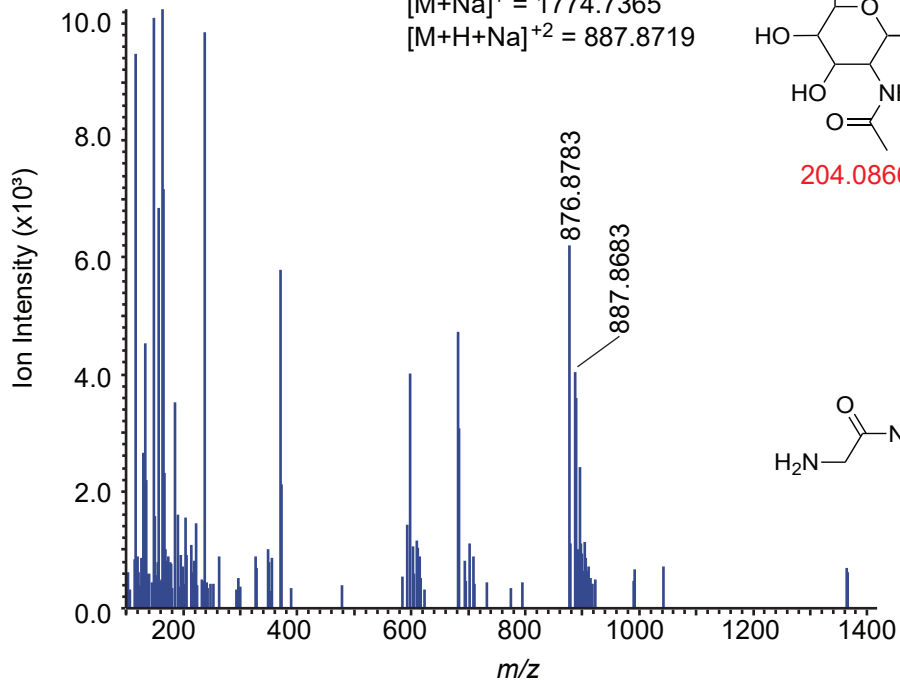

### B

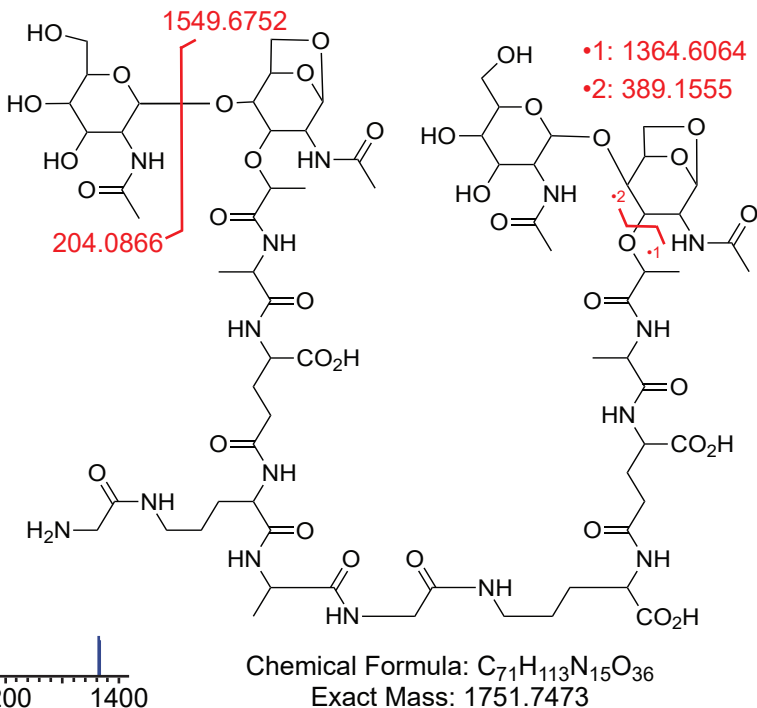

### C

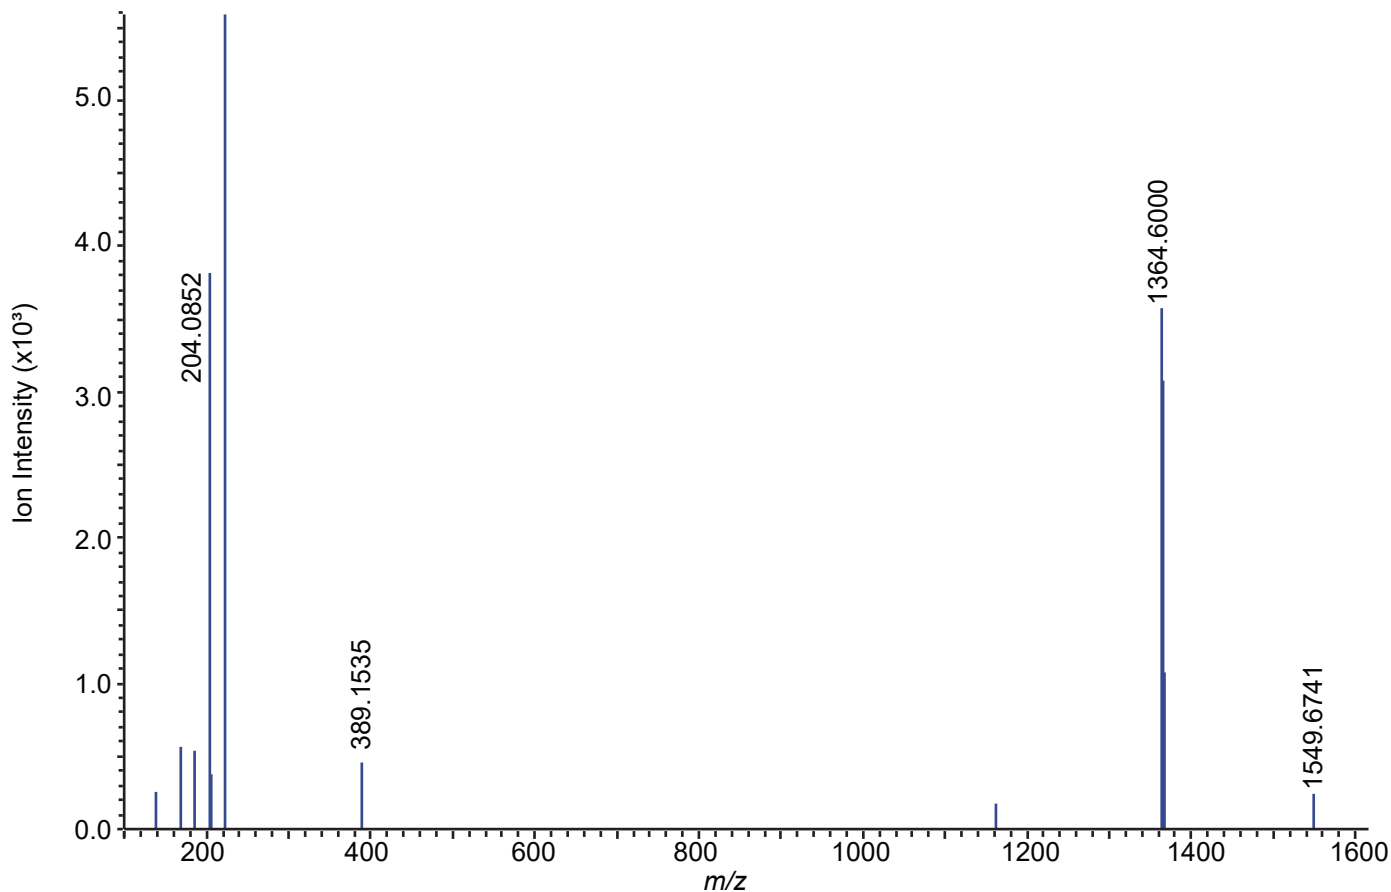

Supplemental Figure 30: (A) MS1 spectra generated from scanning retention times of 20.457-20.590 minutes. (B) The structure of muropeptide 17b. Cleavages with resulting  $m/z$  fragments are shown in red. (C) MS2 obtained from targeting precursor ion 876.87755  $[M+H]^{+2}$ . Red fragments generated in B correspond to observed MS2 fragments in C.

# A Muropeptide 17c

RT:[21.800-22.000]

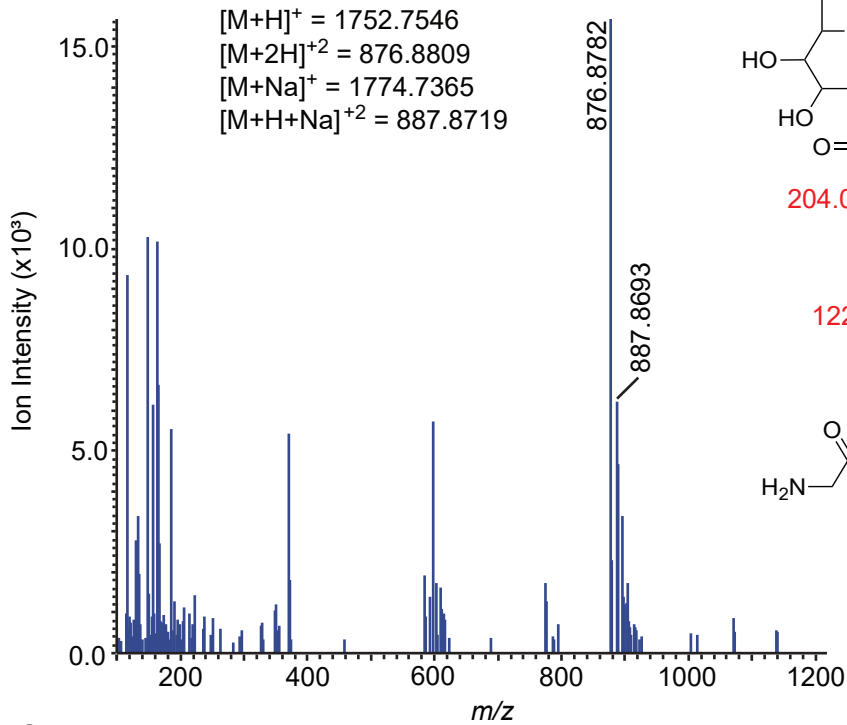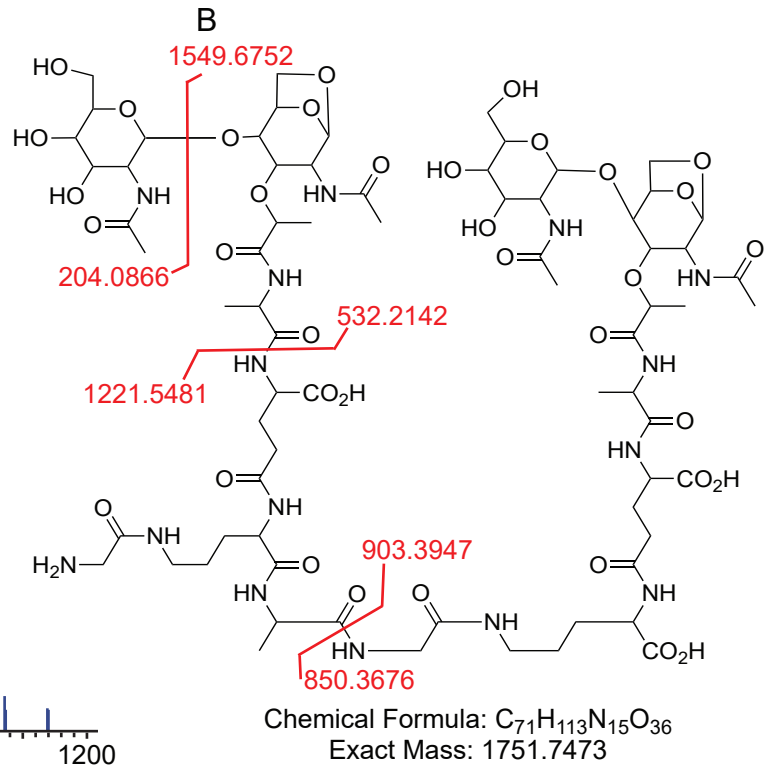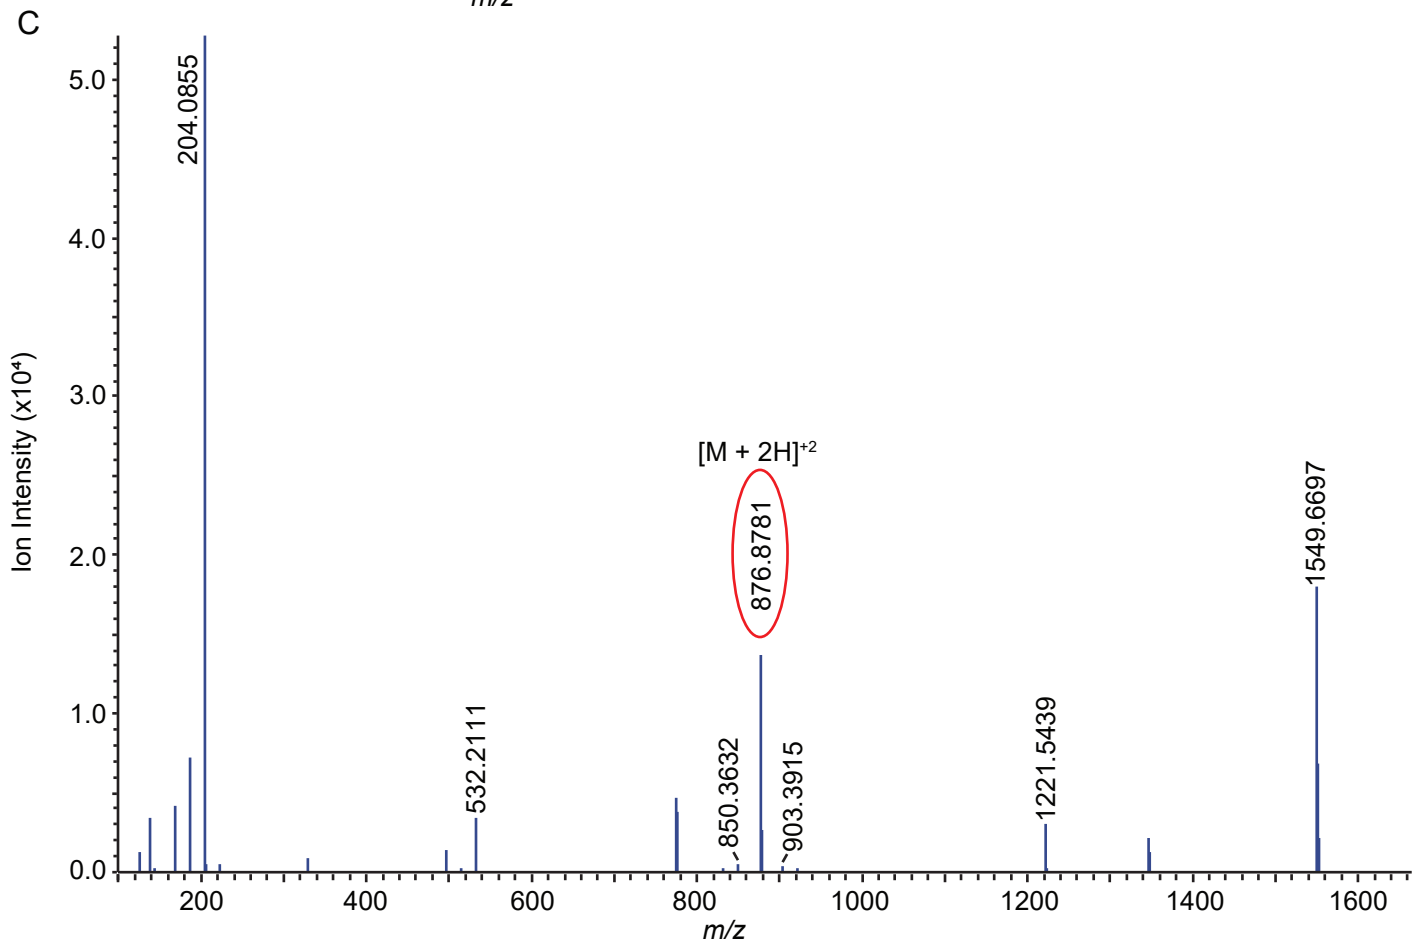

Supplemental Figure 31: (A) MS1 spectra generated from scanning retention times of 21.800-22.000 minutes. (B) The structure of muropeptide 17c. Cleavages with resulting  $m/z$  fragments are shown in red. (C) MS2 obtained from targeting precursor ion 876.87755  $[M+H]^{+2}$ . Red fragments generated in B correspond to observed MS2 fragments in C.

Supplemental Table 4: A comparison of plasmid content in 5A11, 5A3, 5A3 N.I., and 5A3/*chbC* *B. burgdorferi* strains.

| Plasmid       | 5A11 | 5A3 | 5A3 N. I. | 5A3/ <i>chbC</i> |
|---------------|------|-----|-----------|------------------|
| <i>cp9</i>    | +    | -   | -         | -                |
| <i>cp26</i>   | +    | +   | +         | +                |
| <i>cp32-1</i> | +    | +   | +         | +                |
| <i>cp32-3</i> | +    | +   | +         | +                |
| <i>cp32-4</i> | +    | +   | +         | +                |
| <i>cp32-6</i> | +    | +   | +         | +                |
| <i>cp32-7</i> | +    | +   | +         | +                |
| <i>cp32-8</i> | +    | +   | +         | +                |
| <i>cp32-9</i> | +    | +   | +         | +                |
| <i>lp5</i>    | +    | -   | -         | -                |
| <i>lp17</i>   | +    | +   | +         | +                |
| <i>lp21</i>   | +    | +   | -         | +                |
| <i>lp25</i>   | +    | +   | -         | +                |
| <i>lp28-1</i> | +    | +   | -         | +                |
| <i>lp28-2</i> | +    | +   | +         | +                |
| <i>lp28-3</i> | +    | +   | +         | +                |
| <i>lp28-4</i> | +    | +   | +         | +                |
| <i>lp36</i>   | +    | +   | -         | +                |
| <i>lp38</i>   | +    | +   | +         | +                |
| <i>lp54</i>   | +    | +   | +         | +                |
| <i>lp56</i>   | +    | +   | +         | +                |

Supplemental Table 5: In addition to the clean deletion of *chbC*, 5A3/*chbC* had the following single nucleotide polymorphisms, relative to 5A3.

| Location      | Position | Mutation        | Annotation                    | Gene       |
|---------------|----------|-----------------|-------------------------------|------------|
| <i>lp28-1</i> | 27,425   | S141S (AGT→AGC) | variable surface antigen VlsE | BB_RS05840 |
| <i>lp28-1</i> | 37,433   | A144D (GCT→GAT) | variable surface antigen VlsE | BB_RS05840 |
| <i>lp28-1</i> | 27,897   | D299N (GAT→AAT) | variable surface antigen VlsE | BB_RS05840 |
| <i>lp28-1</i> | 27,901   | G300D (GGT→GAT) | variable surface antigen VlsE | BB_RS05840 |
| <i>lp28-1</i> | 27,910   | E303G (GAG→GGG) | variable surface antigen VlsE | BB_RS05840 |

A

| Feature Name     | Retention Time (min) | # of Peaks |
|------------------|----------------------|------------|
| C01              | 13.34                | 31         |
| C02              | 17.01                | 23         |
| C03 <sup>°</sup> | 9.08                 | 17         |
| C04              | 11.61                | 13         |
| C05              | 17.83                | 12         |
| C06              | 3.10                 | 12         |
| C09              | 3.10                 | 9          |
| C10              | 12.71                | 8          |
| C11*             | 15.86                | 7          |
| C12              | 16.45                | 7          |
| C13              | 13.34                | 6          |
| C14              | 13.35                | 6          |
| C15              | 13.35                | 6          |
| C16              | 3.10                 | 6          |
| C17              | 1.82                 | 6          |
| C18              | 16.45                | 5          |
| C19              | 17.01                | 5          |
| C20              | 17.82                | 3          |
| C21              | 13.34                | 3          |
| C22              | 13.34                | 3          |
| C23              | 12.80                | 3          |
| C24              | 5.74                 | 3          |
| C25              | 20.38                | 2          |
| C26              | 19.15                | 2          |
| C27              | 16.02                | 2          |
| C28              | 13.34                | 2          |
| C29              | 12.71                | 2          |
| C30              | 13.03                | 2          |
| C31              | 12.78                | 2          |
| C36              | 3.09                 | 2          |
| C37              | 3.11                 | 2          |

Supplementary Table 6: A) Features generated by RamCluster used for the comparison of G-G-anhM content in peptidoglycan from A3 and A3/*chbC* *B. burgdorferi*. Each feature is composed of a retention time and at least two peaks that correspond to an individual *m/z*. All features listed were used in the analysis. Features designated with an asterisk contain peaks corresponding to G-G-anhM. Features not listed (feature c07, c08, and c32-c35) were manually omitted — they represented adducts and redundancies that were not filtered out by RamClustR. A further breakdown of the peaks that compose each feature can be found in Supplemental Dataset 1. B) Relative comparison of G-G-anhM intensity in 5A3 and 5A3/*chbC* *B. burgdorferi*. All features were divided into two groups: G-G-anhM (features C03 & C11, designated by asterisk) or G-M (all other features).

<sup>°</sup>Feature C03 contained peaks corresponding to two separate muropeptides that had nearly identical retention times — one G-G-anhM and one G-M. Peaks within C03 were manually assigned as G-G-anhM or G-M depending on the muropeptide they correspond to. A further breakdown of which peaks in C03 correspond to G-G-anhM can be found in Source Data.

B

| Strain           | Total G-G-anhM Intensity | Total G-M Intensity | % G-G-anhM in Total PG | % G-G-anhM Reduction Relative to 5A3 |
|------------------|--------------------------|---------------------|------------------------|--------------------------------------|
| 5A3              | 68977                    | 4813717             | 1.43                   | —                                    |
| 5A3/ <i>chbC</i> | 47423                    | 5249974             | 0.90                   | 37.1                                 |

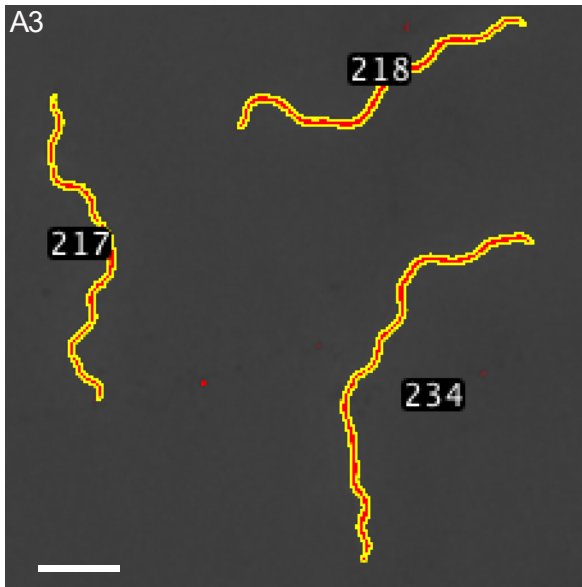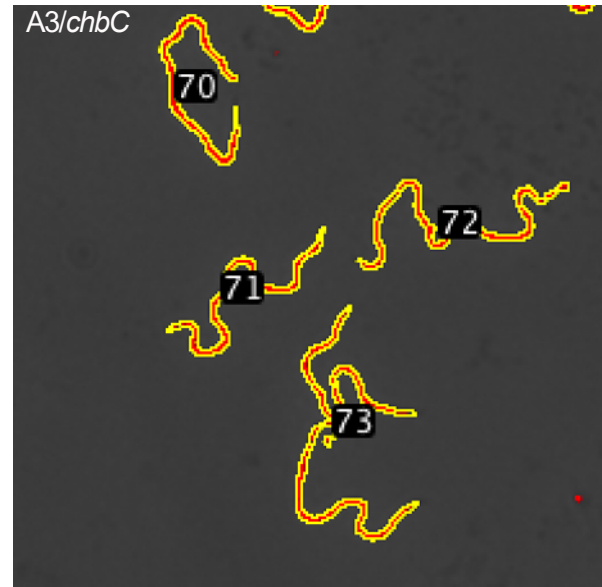

Supplemental Figure 32: Thresholds applied to phase-contrast micrographs containing *B. burgdorferi* A3 (left) and A3/chbC (right). Thresholds were generated using Fiji. Scale bars are 5  $\mu\text{m}$ .
